# Supplementary material for: Digitisation of a modular plug and play 3D printed continuous flow system for chemical synthesis
Source: Royal Society of Chemistry journal article supplement (doi:10.1039/d3dd00128h), 2023-01-01
Supplement: d3dd00128h1.pdf [file d3dd00128h1.pdf]

## Supporting information

# Digitisation of a Modular Plug and Play 3D Printed Continuous Flow System for Chemical Synthesis

Mireia Benito Montaner, Matthew R. Penny and Stephen T. Hilton\*

UCL School of Pharmacy, 29-39 Brunswick Square, London WC1N 1AX

† Electronic supplementary information (ESI) available

\*Corresponding author: [s.hilton@ucl.ac.uk](mailto:s.hilton@ucl.ac.uk)

Mireia Benito Montaner: <https://orcid.org/0009-0001-6406-9248>

Matthew R. Penny: <https://orcid.org/0000-0003-3572-1783>

Stephen T. Hilton: <https://orcid.org/0000-0001-8782-4499>

GITHUB LINK: [GitHub - sthilton/Proteus-Flow-Digital-](https://github.com/sthilton/Proteus-Flow-Digital-)

## TABLE OF CONTENTS

|         |                                                                                                                     |    |
|---------|---------------------------------------------------------------------------------------------------------------------|----|
| S.1     | Experimental .....                                                                                                  | 10 |
| S.1.1   | General Experimental and analysis .....                                                                             | 10 |
| S.2     | Digital Continuous Flow System Design .....                                                                         | 11 |
| S.2.1   | Design of Digital Flow base .....                                                                                   | 11 |
| S.2.2   | Ultimaker Cura settings and Tinkercad design for 3D printed components .....                                        | 12 |
| S.2.2.1 | Digital Flow Base .....                                                                                             | 12 |
| S.2.2.2 | Base Supports .....                                                                                                 | 13 |
| S.2.2.3 | Lid for Digital Flow Base .....                                                                                     | 14 |
| S.2.3   | Assembly of the 3D printed and electronic components Digital Base Flow .....                                        | 15 |
| S.2.3.1 | Wire connections .....                                                                                              | 19 |
| S.2.4   | Bill of Materials .....                                                                                             | 21 |
| S.2.5   | Meguno Interface Platform .....                                                                                     | 22 |
| S.2.6   | Arduino code .....                                                                                                  | 25 |
| S.3     | Phototemperature sensor Module .....                                                                                | 30 |
| S.3.1   | Ultimaker Cura settings and Tinkercad designs for 3D printed components of the Phototemperature Sensor Module ..... | 30 |
| S.3.1.1 | Phototemperature Sensor Module .....                                                                                | 31 |
| S.3.1.2 | Lid for the Phototemperature Sensor Module .....                                                                    | 32 |
| S.3.1.3 | Reactor Support and air cooling system bottom part .....                                                            | 33 |
| S.3.1.4 | Reactor Support and air cooling system top part .....                                                               | 35 |
| S.3.3   | Assembly of the 3D printed and electronic components of the Phototemperature Sensor Module .....                    | 36 |
| S.3.4   | Bill of Materials .....                                                                                             | 39 |
| S.4     | Flow rate sensor Module .....                                                                                       | 40 |
| S.4.1   | Design of the flow rate Sensor Module .....                                                                         | 40 |
| S.4.2   | Ultimaker Cura settings and Tinkercad designs for 3D printed components of the flow rate sensor module .....        | 41 |
| S.4.2.1 | Flow rate Sensor Module .....                                                                                       | 42 |
| S.4.2.2 | Lid for the Flow rate sensor module .....                                                                           | 43 |
| S.4.3   | Assembly of the 3D printed and electronic components of the flow rate sensor module .....                           | 43 |
| S.4.4   | Bill of Materials .....                                                                                             | 46 |
| S.5     | Three Temperature sensor Module .....                                                                               | 46 |
| S.5.1   | Design of the flow rate Sensor Module .....                                                                         | 46 |
| S.5.2   | Ultimaker Cura settings and Tinkercad designs for 3D printed components of the 3 Temperature Sensor Module .....    | 47 |
| S.5.2.1 | Three Temperature Sensor Module .....                                                                               | 48 |

|                                                                                                                |     |
|----------------------------------------------------------------------------------------------------------------|-----|
| S.5.2.2 Lid for the Three Temperature Sensor Module.....                                                       | 49  |
| S.5.3 Assembly of the 3D printed and electronic components of the 3 Temperature Sensor Module .....            | 50  |
| S.5.4 Bill of Materials.....                                                                                   | 51  |
| S.6 Scale up version of Digital Continuous Flow System Design .....                                            | 52  |
| S.6.1 Design of Scale up version.....                                                                          | 52  |
| S.6.2 Tinkercad design and assembly of the base block for the scale up version .....                           | 52  |
| S.6.2.1 Tinkercad design of scale up Digital Flow Base .....                                                   | 53  |
| S.6.2.2 Wiring connections of scale up Digital Flow Base .....                                                 | 54  |
| S.6.3. Tinkercad design and assembly of the 3D printed and electronic components scale up Injection block..... | 55  |
| S.6.3.1 Tinkercad design of scale up Digital Injection Block.....                                              | 56  |
| S.6.3.2 Tinkercad design of scale up Digital Injection Block.....                                              | 57  |
| S.6.3.3 Assembly of the 3D printed and electronic components to the scale up Digital Injection Block.....      | 59  |
| S.6.4 Design of the 3D printed scale up bottle holder .....                                                    | 62  |
| S.6.5 Assembly of Scale up flow system .....                                                                   | 65  |
| S.6.6 Bill of Materials.....                                                                                   | 65  |
| S.6.7 Meguno Link Interface Platform.....                                                                      | 66  |
| S.6.8 Arduino Codes .....                                                                                      | 77  |
| S.7 Ultimaker Cura Settings.....                                                                               | 85  |
| S.7.1. PLA 3D Printing settings without support.....                                                           | 85  |
| S.7.2. PLA 3D Printing settings with support .....                                                             | 87  |
| S.7.3. PP 3D Printing settings .....                                                                           | 89  |
| S.8 Desings for 3D printed reactors .....                                                                      | 91  |
| S.8.1 CDR for the Phototemperature module with a temperature sensor slot .....                                 | 91  |
| S.8.2 CDR with a temperature sensor slot.....                                                                  | 92  |
| S.8.3 CDR with a probe slot inserted into the channel .....                                                    | 93  |
| S.9 Technical data of electronics .....                                                                        | 94  |
| S.9.1 Arduino boards .....                                                                                     | 94  |
| S.9.2 Relay Shield .....                                                                                       | 95  |
| S.9.3 Temperature Sensor .....                                                                                 | 95  |
| S.9.3.1 Calibration .....                                                                                      | 96  |
| S.9.4 Flow rate sensor.....                                                                                    | 96  |
| S.9.4.1 Flow rate sensor calibration Methanol.....                                                             | 99  |
| S.9.4.2 Flow rate sensor calibration IPA .....                                                                 | 100 |
| S.9.4.3 Flow rate sensor calibration Acetone .....                                                             | 101 |
| S.9.4.4 Flow rate sensor calibration Ethanol .....                                                             | 102 |

|         |                                                |     |
|---------|------------------------------------------------|-----|
| S.9.4.5 | Flow rate sensor calibration Acetonitrile..... | 103 |
| S.10    | General reaction procedures.....               | 104 |
| S.11    | References .....                               | 113 |

## SUPPLEMENTARY FIGURES

|                                                                                                                                                                                                                       |    |
|-----------------------------------------------------------------------------------------------------------------------------------------------------------------------------------------------------------------------|----|
| Supplementary Figure 1: Design and fitting of the Digital Base flow on the continuous flow system (Red Square). A) Front view; B) Top view; C) Side view, D) Analog continuous flow system .....                      | 11 |
| Supplementary Figure 2: 3D printed continuous flow system with the Three Temperature module inserted. A) Front view. B) Side view .....                                                                               | 12 |
| Supplementary Figure 3: Technical Drawing Showing the Dimensions of the Digital Base Flow Design .....                                                                                                                | 12 |
| Supplementary Figure 4: Tinkercad design illustrating the Digital Base Flow. ....                                                                                                                                     | 13 |
| Supplementary Figure 5: Tinkercad design illustrating the planned support for the base component. ....                                                                                                                | 13 |
| Supplementary Figure 6: Technical Drawing Showing the Dimensions of the Digital Base Flow lid Design.....                                                                                                             | 14 |
| Supplementary Figure 7: Tinkercad design illustrating the planned lid for the base block. ..                                                                                                                          | 14 |
| Supplementary Figure 8: 3D printed components of the Digital Base flow. A) Bottom view; B) Front view; C) Top view; D) Digital Base flow lid; E) Back view. ....                                                      | 15 |
| Supplementary Figure 9: Electronic components .....                                                                                                                                                                   | 15 |
| Supplementary Figure 10: installation of DB15 and kessil lamp connector. A) Back view; B) Front view .....                                                                                                            | 16 |
| Supplementary Figure 11: installation of the Arduino board. ....                                                                                                                                                      | 16 |
| Supplementary Figure 12: installation of the Relay shield. ....                                                                                                                                                       | 16 |
| Supplementary Figure 13: Arduino wire connections.....                                                                                                                                                                | 17 |
| Supplementary Figure 14: power supply wire connections to the lid.....                                                                                                                                                | 17 |
| Supplementary Figure 15: A) power supply wire connections to the base; B) power supply wire connections to the Arduino .....                                                                                          | 17 |
| Supplementary Figure 16: Installation of lid.....                                                                                                                                                                     | 18 |
| Supplementary Figure 17: completion of Digital flow base. A) Back view; B) Lateral view; C) Front view .....                                                                                                          | 18 |
| Supplementary Figure 18: Fritzing design showing all the wire connections of the Digital base.....                                                                                                                    | 19 |
| Supplementary Figure 19: Connection manager tab .....                                                                                                                                                                 | 23 |
| Supplementary Figure 20: Monitor tab .....                                                                                                                                                                            | 23 |
| Supplementary Figure 21: MegunoLink Interface of the project using the Arduino Uno Board. A) Welcome screen tab. B) Temperature monitoring tab. C) Flow rate monitoring tab. D) Phototemperature monitoring tab. .... | 24 |
| Supplementary Figure 22: CommandHandler file.....                                                                                                                                                                     | 26 |
| Supplementary Figure 23: A) Phototemperature module inserted in the digital flow system. B) Phototemperature module. C) Reactor holder and air cooler .....                                                           | 30 |
| Supplementary Figure 24: Tinkercad design illustrating the planned Phototemperature Sensor Module .....                                                                                                               | 31 |
| Supplementary Figure 25: Technical Drawing Showing the Dimensions of the Phototemperature Sensor Module.....                                                                                                          | 31 |
| Supplementary Figure 26: Tinkercad design illustrating the planned lid for the Phototemperature Module sensor. ....                                                                                                   | 32 |
| Supplementary Figure 27: Technical Drawing Showing the Dimensions of the Phototemperature Sensor Module lid .....                                                                                                     | 32 |
| Supplementary Figure 28: Tinkercad design illustrating the planned Reactor Support and air cooling system bottom part .....                                                                                           | 33 |
| Supplementary Figure 29: Technical Drawing Showing the Dimensions of the Phototemperature Module reactor holder bottom part .....                                                                                     | 34 |

|                                                                                                                                                                                                                                          |    |
|------------------------------------------------------------------------------------------------------------------------------------------------------------------------------------------------------------------------------------------|----|
| Supplementary Figure 30: Tinkercad design illustrating the planned Reactor Support and air cooling system top part .....                                                                                                                 | 35 |
| Supplementary Figure 31: Technical Drawing Showing the Dimensions of the Phototemperature Module reactor holder top part .....                                                                                                           | 35 |
| Supplementary Figure 32: 3D printed and electronic components of the Phototemperature sensor Module .....                                                                                                                                | 36 |
| Supplementary Figure 33: Installation of 15 pin male connector (Step 1) .....                                                                                                                                                            | 36 |
| Supplementary Figure 34: Installation of Step 2. ....                                                                                                                                                                                    | 37 |
| Supplementary Figure 35: Installation of Step 3. ....                                                                                                                                                                                    | 37 |
| Supplementary Figure 36: Wire connections of the sensor .....                                                                                                                                                                            | 37 |
| Supplementary Figure 37: completion of flow rate sensor module.....                                                                                                                                                                      | 38 |
| Supplementary Figure 38: reactor support covered in aluminium film .....                                                                                                                                                                 | 38 |
| Supplementary Figure 39: reactor support bottom part with mirror .....                                                                                                                                                                   | 38 |
| Supplementary Figure 40: 3D printed reactor on top of the reactor support bottom part.....                                                                                                                                               | 38 |
| Supplementary Figure 41: reactor support covered in aluminium film .....                                                                                                                                                                 | 39 |
| Supplementary Figure 42: Flow rate module inserted in the digital flow system. ....                                                                                                                                                      | 41 |
| Supplementary Figure 43: Tinkercad design illustrating the planned flow rate Sensor Module .....                                                                                                                                         | 42 |
| Supplementary Figure 44: Technical Drawing Showing the Dimensions of the flow rate sensor Module .....                                                                                                                                   | 42 |
| Supplementary Figure 45: Tinkercad design illustrating the planned lid for the flow rate sensor Module. ....                                                                                                                             | 43 |
| Supplementary Figure 46: 3D printed and electronic components of the flow rate sensor Module .....                                                                                                                                       | 44 |
| Supplementary Figure 47: Installation of 15 pin male connector (Step 1) .....                                                                                                                                                            | 44 |
| Supplementary Figure 48: Installation of Step 2. ....                                                                                                                                                                                    | 45 |
| Supplementary Figure 49: Wire connections of the sensor .....                                                                                                                                                                            | 45 |
| Supplementary Figure 50: completion of flow rate sensor module.....                                                                                                                                                                      | 45 |
| Supplementary Figure 51: Flow rate module inserted in the digital flow system. ....                                                                                                                                                      | 47 |
| Supplementary Figure 52: Tinkercad design illustrating the planned Three Temperature Sensor Module .....                                                                                                                                 | 48 |
| Supplementary Figure 53: Technical Drawing Showing the Dimensions of the 3 Temperature Sensor Module.....                                                                                                                                | 48 |
| Supplementary Figure 54: Tinkercad design illustrating the planned lid for the Three Temperature Module sensor. ....                                                                                                                     | 49 |
| Supplementary Figure 55: 3D printed plug-in Three temperature module. A) Module assembled B) Electronics.....                                                                                                                            | 50 |
| Supplementary Figure 56: Design and fitting of the Scale up system with the new versions of the Bottle holder and Base and injection block on the continuous flow system (Red blocks). A) Lateral view; B) Side view; C) Front view..... | 52 |
| Supplementary Figure 57: Tinkercad design illustrating the Digital Base Flow. ....                                                                                                                                                       | 53 |
| Supplementary Figure 58: Technical Drawing Showing the Dimensions of the Arduino Mega base block.....                                                                                                                                    | 53 |
| Supplementary Figure 59: Arduino Mega board wire connections.....                                                                                                                                                                        | 54 |
| Supplementary Figure 60: Tinkercad design illustrating the scale up Injection block version. ....                                                                                                                                        | 56 |
| Supplementary Figure 61: Technical Drawing Showing the Dimensions of the Injection block .....                                                                                                                                           | 56 |
| Supplementary Figure 62: Tinkercad design illustrating the scale up Injection block lid. ....                                                                                                                                            | 57 |
| Supplementary Figure 63: Technical Drawing Showing the Dimensions of the Injection block lid.....                                                                                                                                        | 57 |

|                                                                                                                                                                                                                                              |    |
|----------------------------------------------------------------------------------------------------------------------------------------------------------------------------------------------------------------------------------------------|----|
| Supplementary Figure 64: 6 way loop valve.....                                                                                                                                                                                               | 58 |
| Supplementary Figure 65: 3D printed components of the Scale up injection block.....                                                                                                                                                          | 59 |
| Supplementary Figure 66: Components of the Injection block.....                                                                                                                                                                              | 59 |
| Supplementary Figure 67: installation of union body, lock washer and nut to the injection block lid.....                                                                                                                                     | 60 |
| Supplementary Figure 68: installation of two L-type valves.....                                                                                                                                                                              | 60 |
| Supplementary Figure 69: installation of two 6-port loop injection valves.....                                                                                                                                                               | 60 |
| Supplementary Figure 70: installation of tubing from the L-type valve to the union body ...                                                                                                                                                  | 61 |
| Supplementary Figure 71: installation of the waste tube.....                                                                                                                                                                                 | 61 |
| Supplementary Figure 72: installation of two 2mL loop tubing.....                                                                                                                                                                            | 61 |
| Supplementary Figure 73: installation of the Relay shield.....                                                                                                                                                                               | 62 |
| Supplementary Figure 74: lid secured to the injection block.....                                                                                                                                                                             | 62 |
| Supplementary Figure 75: Tinkercad design illustrating the scale up bottle holder.....                                                                                                                                                       | 63 |
| Supplementary Figure 76: Technical Drawing Showing the Dimensions of the bottle holder for the scale up system.....                                                                                                                          | 63 |
| Supplementary Figure 77: Three-way valves operation A) Valve closed. B) Valve opened.                                                                                                                                                        | 64 |
| Supplementary Figure 78: Assembly step by step of the different blocks.....                                                                                                                                                                  | 65 |
| Supplementary Figure 79: Connection manager tab.....                                                                                                                                                                                         | 67 |
| Supplementary Figure 80: Monitor tab.....                                                                                                                                                                                                    | 68 |
| Supplementary Figure 81: MegunoLink Interface of the project. A) Welcome screen tab. B) System configuration tab. C) System control tab. D) Temperature monitoring tab. E) Phototemperature monitoring tab. F) Flow rate monitoring tab..... | 69 |
| Supplementary Figure 82: Cura preview file showing the Phototemperature Sensor Module with the support placement to 3D print.....                                                                                                            | 89 |
| Supplementary Figure 83: Tinkercad design illustrating the planned reactor for the Phototemperature module.....                                                                                                                              | 91 |
| Supplementary Figure 84: Tinkercad design illustrating the planned reactor with a temperature sensor slot.....                                                                                                                               | 92 |
| Supplementary Figure 85: Tinkercad design illustrating the planned reactor with a probe slot inserted into the channel.....                                                                                                                  | 93 |
| Supplementary Figure 86: Flow rate sensor liquid chemical compatibilities. 4.....                                                                                                                                                            | 97 |

## SUPPLEMENTARY TABLES

|                                                                                                                                                   |    |
|---------------------------------------------------------------------------------------------------------------------------------------------------|----|
| Supplementary Table 1: Ultimaker Cura Settings for 3D printing of Base component .....                                                            | 13 |
| Supplementary Table 2: Ultimaker Cura Settings for 3D printing of Support for the base component.....                                             | 13 |
| Supplementary Table 3: Ultimaker Cura Settings for 3D printing of the lid for the Digital Flow Base .....                                         | 14 |
| Supplementary Table 4: Wire connections of Relay and Arduino shield.....                                                                          | 20 |
| Supplementary Table 5: Bill of Materials for the Digital Flow Base component.....                                                                 | 21 |
| Supplementary Table 6: Ultimaker Cura Settings for 3D printing of the Phototemperature sensor module .....                                        | 31 |
| Supplementary Table 7: Ultimaker Cura Settings for 3D printing of the lid for the Phototemperature Sensor Module.....                             | 33 |
| Supplementary Table 8: Ultimaker Cura Settings for 3D printing of the Reactor Support and air cooling system bottom part .....                    | 34 |
| Supplementary Table 9: Ultimaker Cura Settings for 3D printing of the Reactor Support and air cooling system top part .....                       | 36 |
| Supplementary Table 10: Bill of Materials for the Phototemperature Sensor Module .....                                                            | 40 |
| Supplementary Table 11: Ultimaker Cura Settings for 3D printing of the flow rate sensor module.....                                               | 43 |
| Supplementary Table 12: Ultimaker Cura Settings for 3D printing of the lid for the flow rate Sensor Module lid .....                              | 43 |
| Supplementary Table 13: Bill of Materials for the flow rate sensor Module.....                                                                    | 46 |
| Supplementary Table 14: Ultimaker Cura Settings for 3D printing of the Three Temperature sensor module .....                                      | 49 |
| Supplementary Table 15: Ultimaker Cura Settings for 3D printing of the lid for the Three Temperature Sensor Module.....                           | 49 |
| Supplementary Table 16: Bill of Materials for the 3 Temperature Sensor Module .....                                                               | 51 |
| Supplementary Table 17: Ultimaker Cura Settings for 3D printing of the base block for the scale up version.....                                   | 53 |
| Supplementary Table 18: Wire connections of Relay shield and Arduino Mega Borad.....                                                              | 55 |
| Supplementary Table 19: Ultimaker Cura Settings for 3D printing the injection block for the scale up version.....                                 | 57 |
| Supplementary Table 20: Ultimaker Cura Settings for 3D printing the lid of injection block for the scale up version .....                         | 58 |
| Supplementary Table 21: Ultimaker Cura Settings for 3D the bottle holder for the scale up version .....                                           | 64 |
| Supplementary Table 22: Bill of Materials for the 3 Temperature Sensor Module .....                                                               | 66 |
| Supplementary Table 23: Flow rate of Methanol at different pressures and capillaries.....                                                         | 71 |
| Supplementary Table 24: Flow rate of IPA at different pressures and capillaries .....                                                             | 72 |
| Supplementary Table 25: Flow rate of Ethanol at different pressures and capillaries .....                                                         | 73 |
| Supplementary Table 26: Flow rate of Acetone at different pressures and capillaries .....                                                         | 74 |
| Supplementary Table 27: Flow rate of Water at different pressures and capillaries.....                                                            | 75 |
| Supplementary Table 28: Flow rate of Acetonitrile at different pressures and capillaries.....                                                     | 76 |
| Supplementary Table 29: PLA 3D Printing settings without support .....                                                                            | 86 |
| Supplementary Table 30: PLA 3D Printing settings with support.....                                                                                | 88 |
| Supplementary Table 31: PP 3D Printing settings.....                                                                                              | 90 |
| Supplementary Table 32: Ultimaker Cura Settings for 3D printing of the reactor for the Phototemperature module.....                               | 91 |
| Supplementary Table 33: Ultimaker Cura Post processing modification settings for 3D printing of the reactor for the Phototemperature module ..... | 91 |



|                                                                                                                                                 |     |
|-------------------------------------------------------------------------------------------------------------------------------------------------|-----|
| Supplementary Table 34: Ultimaker Cura Settings for 3D printing of the reactor with a temperature sensor slot .....                             | 92  |
| Supplementary Table 35: Ultimaker Cura Post processing modification settings for 3D printing of the reactor with a temperature sensor slot..... | 92  |
| Supplementary Table 36: Ultimaker Cura Settings for 3D printing of the reactor inserted into the channel .....                                  | 93  |
| Supplementary Table 37: Ultimaker Cura Post processing modification settings for 3D printing of the reactor inserted into the channel.....      | 93  |
| Supplementary Table 38: Arduino Uno Wifi Rev 2 and Arduino Mega Features. 2.....                                                                | 94  |
| Supplementary Table 39: Relay shield Features. 3 .....                                                                                          | 95  |
| Supplementary Table 40: Temperature sensor Features .....                                                                                       | 95  |
| Supplementary Table 41: Supplementary Table 26: Temperature calibrations.....                                                                   | 96  |
| Supplementary Table 42: Flow rate Sensor Features. 4.....                                                                                       | 96  |
| Supplementary Table 43: Flow rate of Methanol calibrations .....                                                                                | 99  |
| Supplementary Table 44: Flow rate of IPA calibrations .....                                                                                     | 100 |
| Supplementary Table 45: Flow rate of Acetone calibrations .....                                                                                 | 101 |
| Supplementary Table 46: Flow rate of Ethanol calibrations .....                                                                                 | 102 |
| Supplementary Table 47: Flow rate of Acetonitrile calibrations .....                                                                            | 103 |

## SUPPLEMENTARY GRAPHS

|                                                                                                                                     |     |
|-------------------------------------------------------------------------------------------------------------------------------------|-----|
| Supplementary Graph 1: Selected capillaries to measure the flow rate of Methanol at specific pressures.....                         | 71  |
| Supplementary Graph 2: Selected capillaries to measure the flow rate of IPA at specific pressures.....                              | 72  |
| Supplementary Graph 3: Selected capillaries to measure the flow rate of Ethanol at specific pressures.....                          | 73  |
| Supplementary Graph 4: Selected capillaries to measure the flow rate of Acetone at specific pressures.....                          | 74  |
| Supplementary Graph 5: Selected capillaries to measure the flow rate of Water at specific pressures.....                            | 75  |
| Supplementary Graph 6: Selected capillaries to measure the flow rate of Acetonitrile at specific pressures.....                     | 76  |
| Supplementary Graph 7: relation between Temperature from three different temperature sensors and a thermometer.....                 | 96  |
| Supplementary Graph 8: Correlation of the flow rates of multiple solvents and the liquid flow sensor value at room temperature..... | 98  |
| Supplementary Graph 9: Correlation of the flow rates of Methanol and the liquid flow sensor value at room temperature.....          | 99  |
| Supplementary Graph 10: Correlation of the flow rates of IPA and the liquid flow sensor value at room temperature.....              | 100 |
| Supplementary Graph 11: Correlation of the flow rates of Acetone and the liquid flow sensor value at room temperature.....          | 101 |
| Supplementary Graph 12: Correlation of the flow rates of Ethanol and the liquid flow sensor value at room temperature.....          | 102 |
| Supplementary Graph 13: Correlation of the flow rates of Acetonitrile and the liquid flow sensor value at room temperature.....     | 103 |

## **S.1 Experimental**

### **S.1.1 General Experimental and analysis**

Stirrer hotplates used in this research were an IKA RCT basic stirrer hotplate and an IKA RCT digital stirrer hotplate. The continuous flow systems used in this research was based on that developed by the Hilton group.<sup>1</sup> All reagents and solvents were purchased from Sigma-Aldrich, Fluka or VWR and used without further purification. The electronic components were purchased from Arduino, Amazon or Keyestudio. Polypropylene (2.85 mm filament) and PLA (2.85 mm filament) was purchased from 3DGBire.<sup>2</sup> 3D Printing was carried out on an Ultimaker 3 3D printer. Metal capillary tubing was purchased from Agilent Technologies. Analytical TLC was carried out on Merck silica gel 60 F<sub>254</sub> pre-coated plastic plates. Short wave UV (245 nm) were used to visualise components. <sup>1</sup>H and <sup>13</sup>C NMR data were recorded on a Bruker AV400 spectrometers. Spectra were recorded in deuteriochloroform and referenced to residual CHCl<sub>3</sub> (<sup>1</sup>H, 7.26 ppm; <sup>13</sup>C, 77.16 ppm). <sup>1</sup>H, and <sup>13</sup>C spectral data were visualized and processed using MestReNova software. Chemical shifts are expressed in ppm ( $\delta$ ) relative to the standard and coupling constants (J) in Hz. The Arduino IDE software version used was 1.8.19, and the MegunoLink library version used was 1.39.0.

## S.2 Digital Continuous Flow System Design

### S.2.1 Design of Digital Flow base

The Digital flow base was designed using the freeware web-based application Tinkercad (Autodesk) software.<sup>3</sup> The components were 3D printed using an Ultimaker 3 – 3D printer and PLA (2.85 mm) filament. The base block was designed to replace the previously used base block from the previously described flow system.<sup>1</sup> The internal space was created to have enough space for an Arduino board and Relay shield and wiring connections. This block has a cavity in the front that allows each of the three modules to fit together and be easily interchanged (**Sup. Fig. 1**).

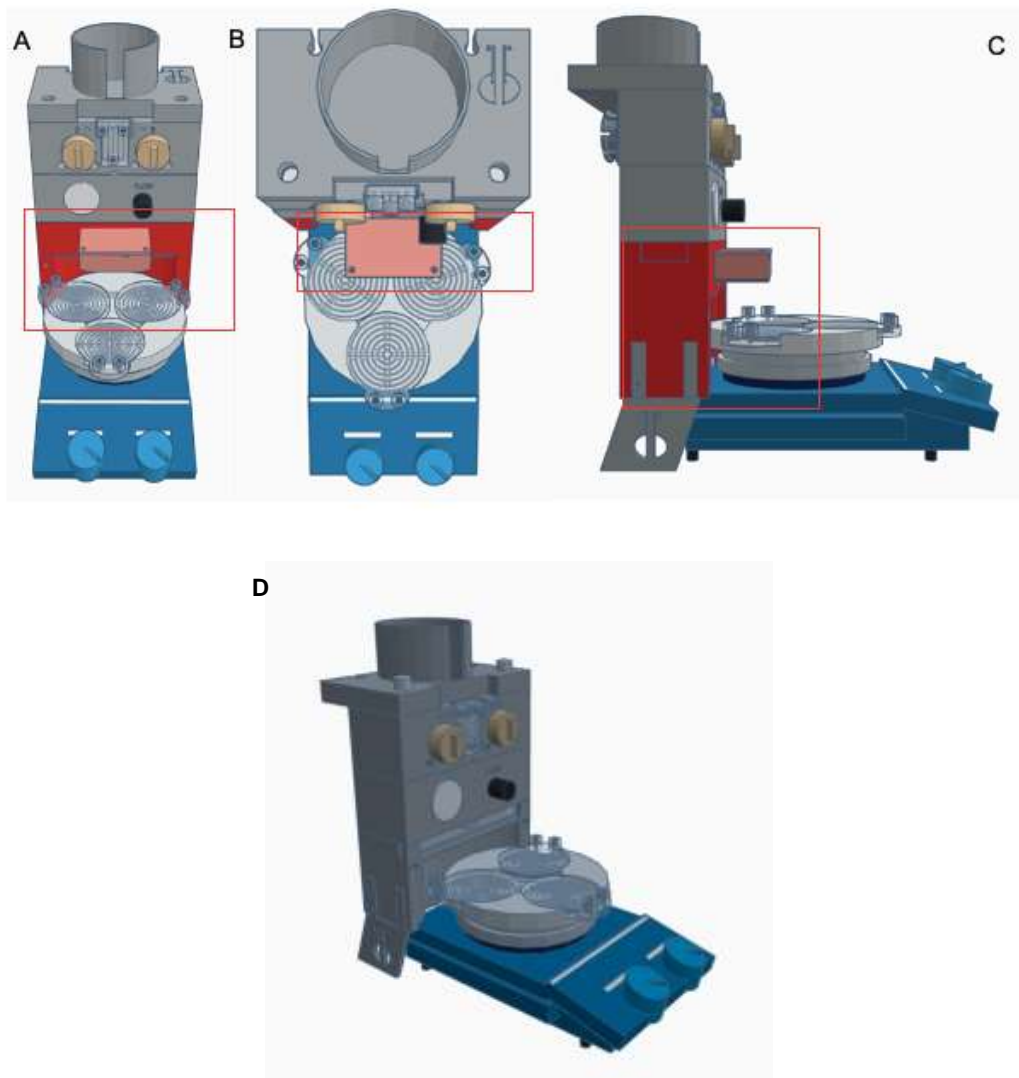

**Supplementary Figure 1:** Design and fitting of the Digital Base flow on the continuous flow system (Red Square). A) Front view; B) Top view; C) Side view, D) Analog continuous flow system.

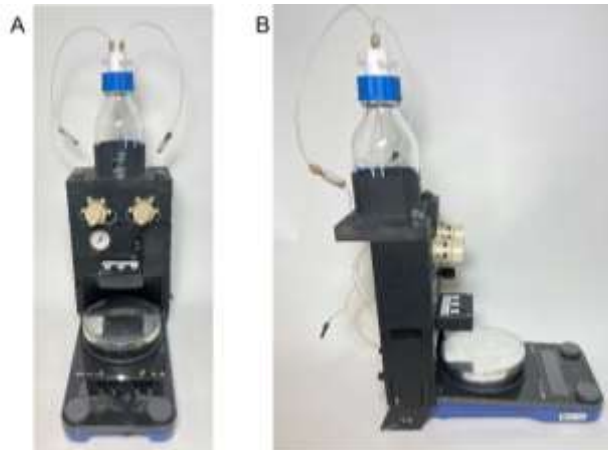

**Supplementary Figure 2:** 3D printed continuous flow system with the Three Temperature module inserted. A) Front view. B) Side view.

## S.2.2 Ultimaker Cura settings and Tinkercad design for 3D printed components

Once the design of the components was completed in Tinkercad, they were exported individually as an STL (Standard Tessellation Language) file and uploaded to Cura software, sliced and 3D printed. The printing settings used for 3D printing the following component are shown in section 7.1.<sup>4</sup>

### S.2.2.1 Digital Flow Base

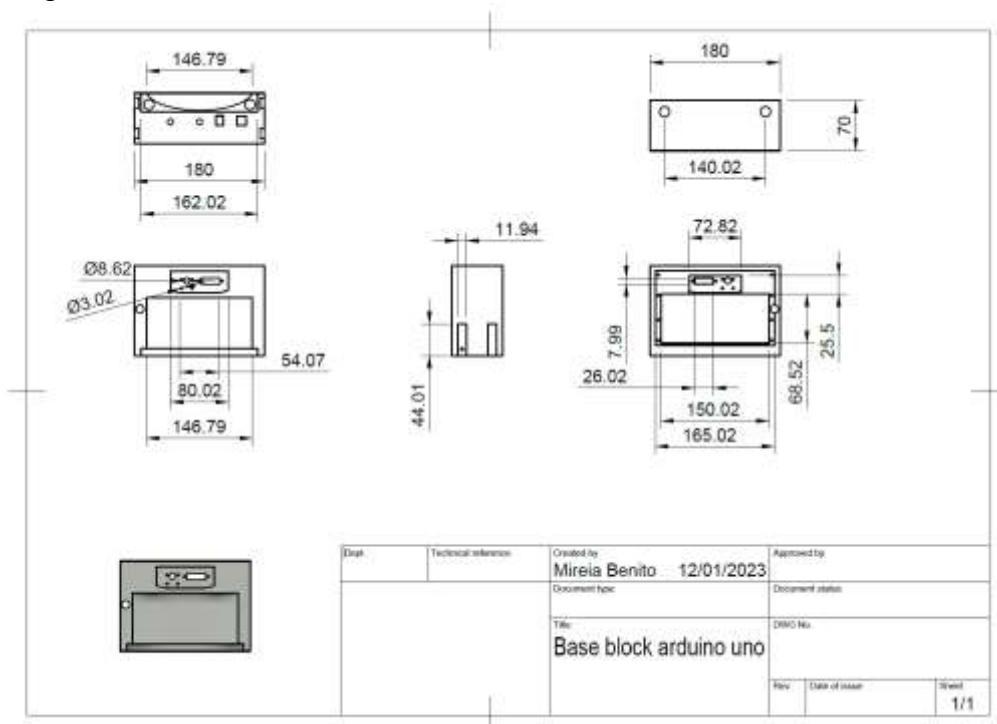

**Supplementary Figure 3:** Technical Drawing Showing the Dimensions of the Digital Base Flow Design.

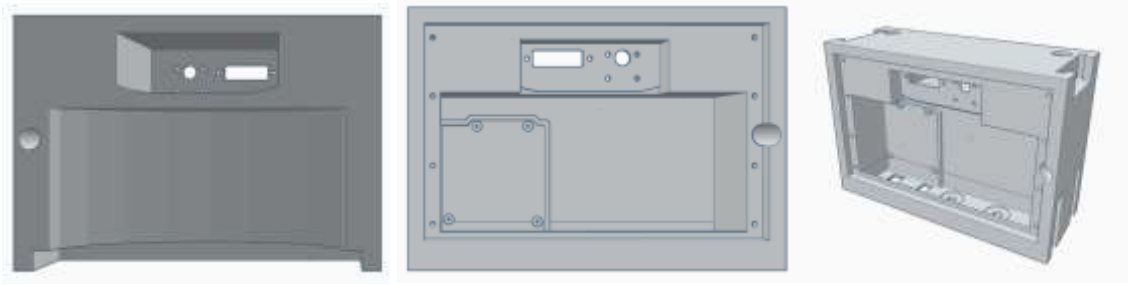

**Supplementary Figure 4:** Tinkercad design illustrating the Digital Base Flow.

|                         |                   |
|-------------------------|-------------------|
| <b>Material</b>         | <b>PLA</b>        |
| <b>Time</b>             | 1 day 18 h 17 min |
| <b>Quantity</b>         | 442 g – 55.89 m   |
| <b>Profile</b>          | Normal 0.15 mm    |
| <b>Support required</b> | Yes               |

**Supplementary Table 1:** Ultimaker Cura Settings for 3D printing of Base component.

#### S.2.2.2 Base Supports

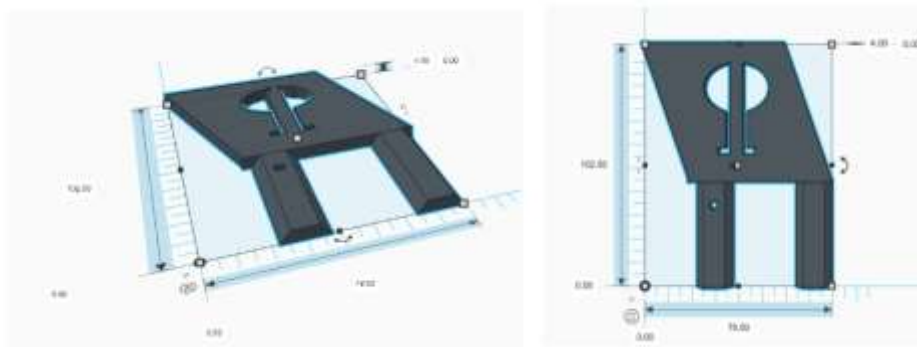

**Supplementary Figure 5:** Tinkercad design illustrating the planned support for the base component.

|                         |               |
|-------------------------|---------------|
| <b>Material</b>         | <b>PLA</b>    |
| <b>Time</b>             | 3 h 46 min    |
| <b>Quantity</b>         | 41 g – 5.16 m |
| <b>Profile</b>          | Fast 0.2 mm   |
| <b>Support required</b> | No            |

**Supplementary Table 2:** Ultimaker Cura Settings for 3D printing of Support for the base component.

### S.2.2.3 Lid for Digital Flow Base

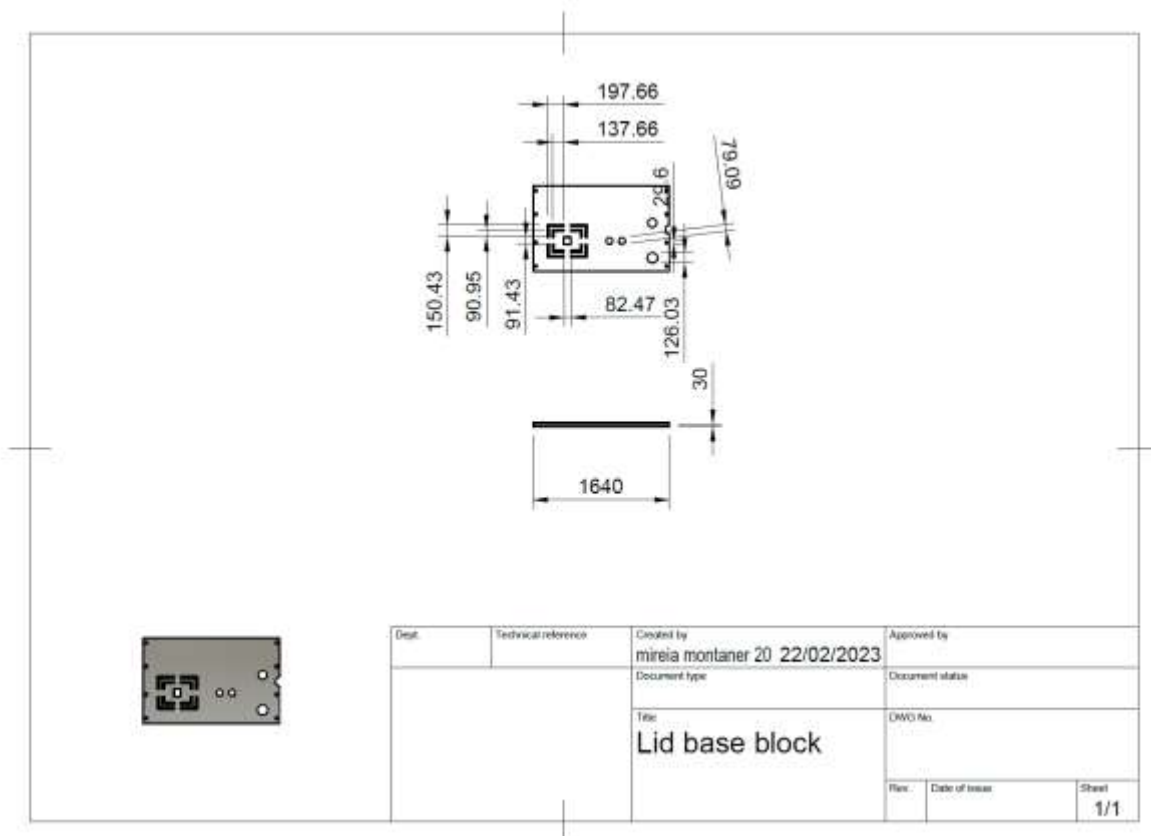

**Supplementary Figure 6:** Technical Drawing Showing the Dimensions of the Digital Base Flow lid Design.

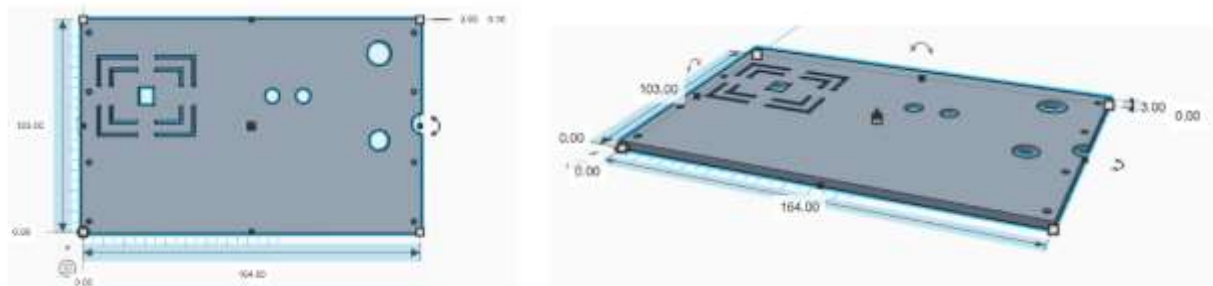

**Supplementary Figure 7:** Tinkercad design illustrating the planned lid for the base block.

|                         |               |
|-------------------------|---------------|
| <b>Material</b>         | <b>PLA</b>    |
| <b>Time</b>             | 5 h 24 min    |
| <b>Quantity</b>         | 61 g – 7.68 m |
| <b>Profile</b>          | Fast 0.2 mm   |
| <b>Support required</b> | No            |

**Supplementary Table 3:** Ultimaker Cura Settings for 3D printing of the lid for the Digital Flow Base.

### S.2.3. Assembly of the 3D printed and electronic components Digital Base Flow

To assemble the Digital Flow base, the 3D printed components were first 3D printed before assembly. The electronic components are built around an Arduino Uno board. The diagram below shows all the 3D printed components (**Sup. Fig. 8**).

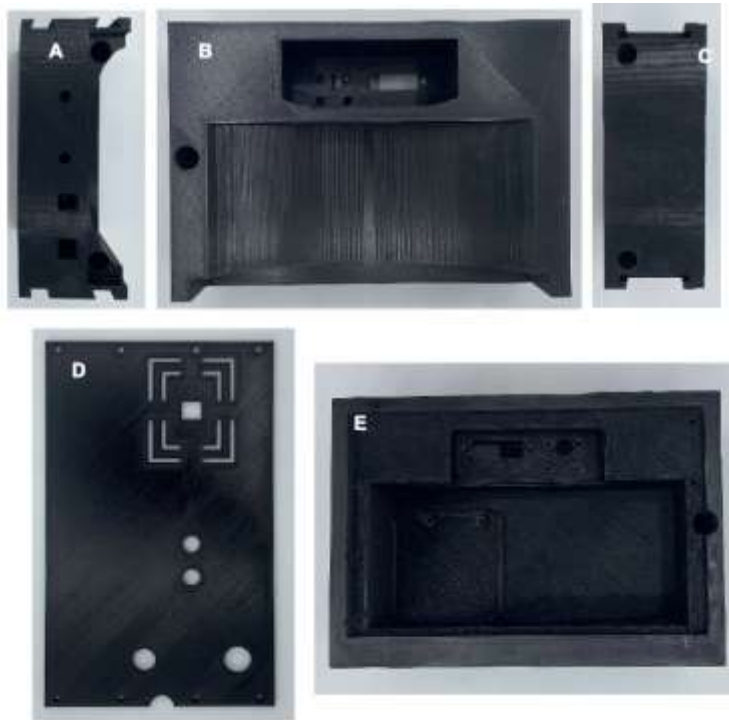

**Supplementary Figure 8:** 3D printed components of the Digital Base flow. A) Bottom view; B) Front view; C) Top view; D) Digital Base flow lid; E) Back view.

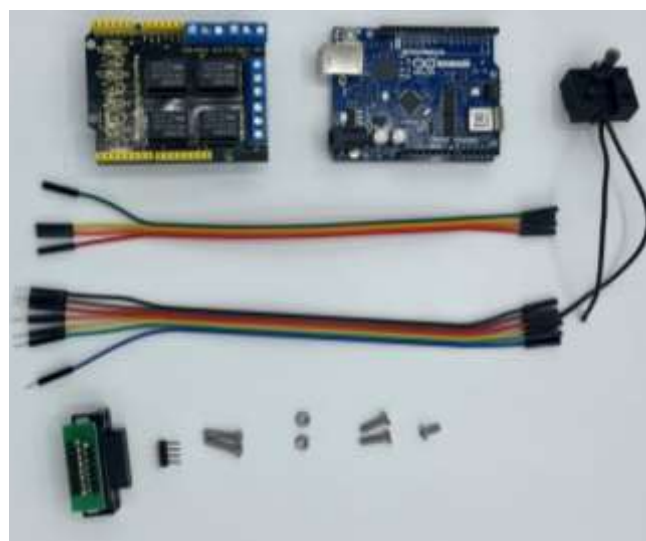

**Supplementary Figure 9:** Electronic components.



**Step 1:** secure the DB15 connector to the base with two M3\*8 screws and nuts and the connector for the Kessil lamp with four M3\*10 screws and associated nuts.

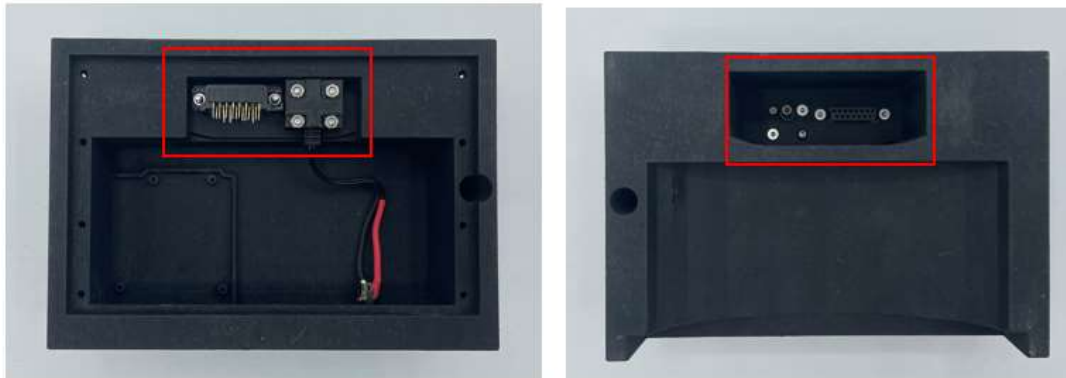

**Supplementary Figure 10:** installation of DB15 and Kessil lamp connector. A) Back view; B) Front view.

**Step 2:** secure the Arduino board with four M3\*4 screw to the base.

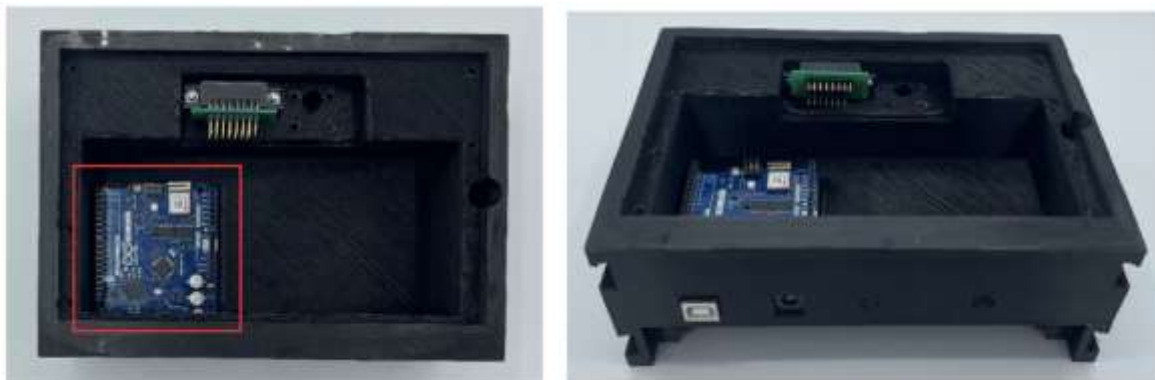

**Supplementary Figure 11:** installation of the Arduino board.

**Step 3:** mount the relay shield on top of the Arduino board.

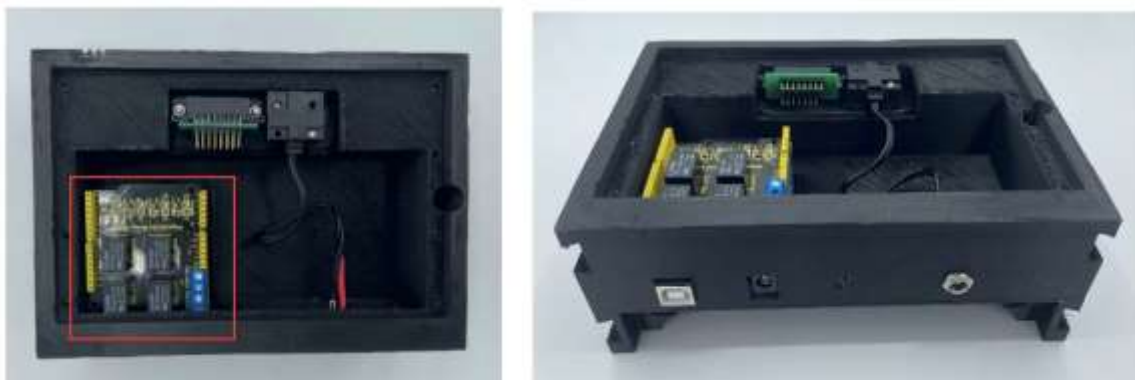

**Supplementary Figure 12:** installation of the relay shield.

**Step 4:** the Arduino and power supply wiring is completed in accordance with the Fritzing diagram (Supplemental Figure 17 and table 4).

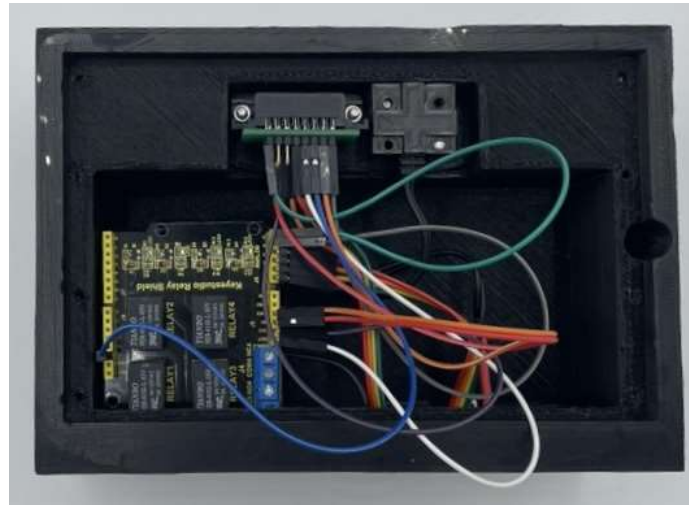

**Supplementary Figure 13:** Arduino wire connections.

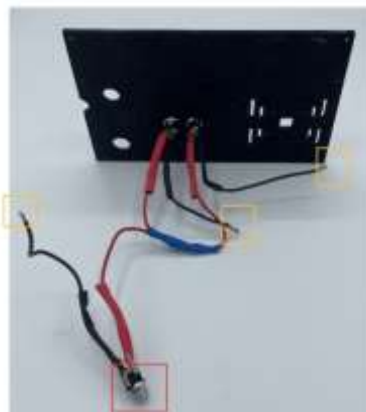

**Supplementary Figure 14:** power supply wire connections to the lid.

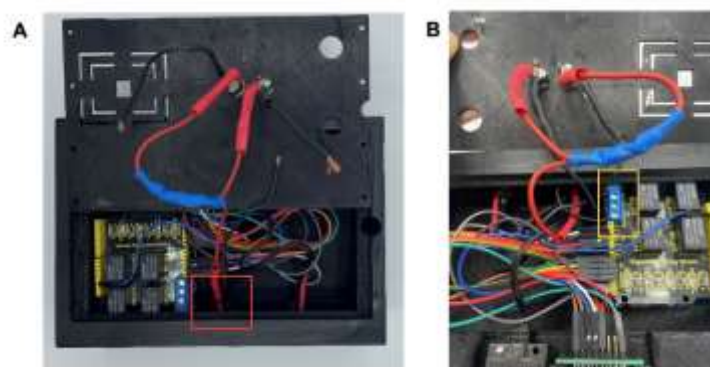

**Supplementary Figure 15:** A) power supply wire connections to the base; B) power supply wire connections to the Arduino.

**Step 5:** secure the lid with eight M3\*8 screws

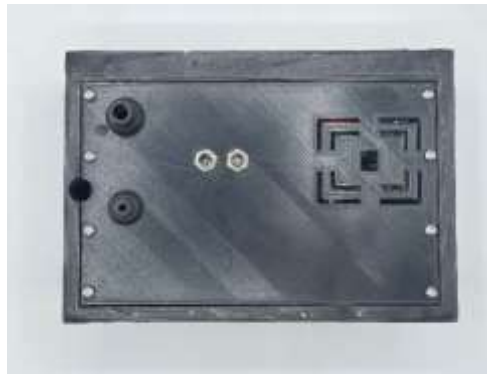

**Supplementary Figure 16:** Installation of lid.

**Step 6:** secure the support legs to the base with one M3\*6 screw on each side.

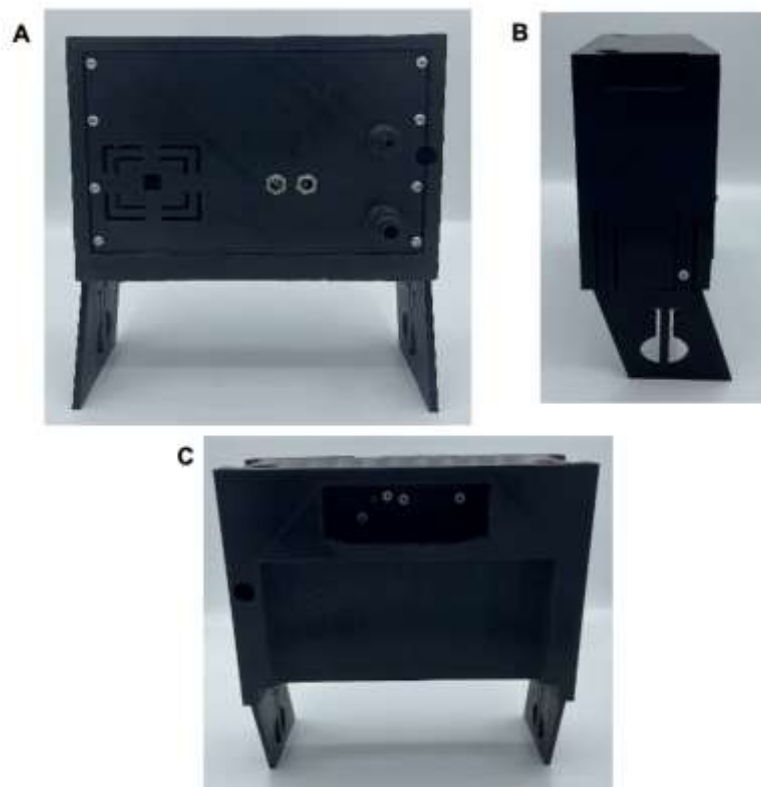

**Supplementary Figure 17:** completion of Digital flow base. A) Back view; B) Lateral view; C) Front view.

### S.2.3.1 Wire connections

The Fritzing diagram shows all wire connections of the Digital Flow Base including the power supply, Kessil lamp and the microcontroller connections to the DB15 connector.

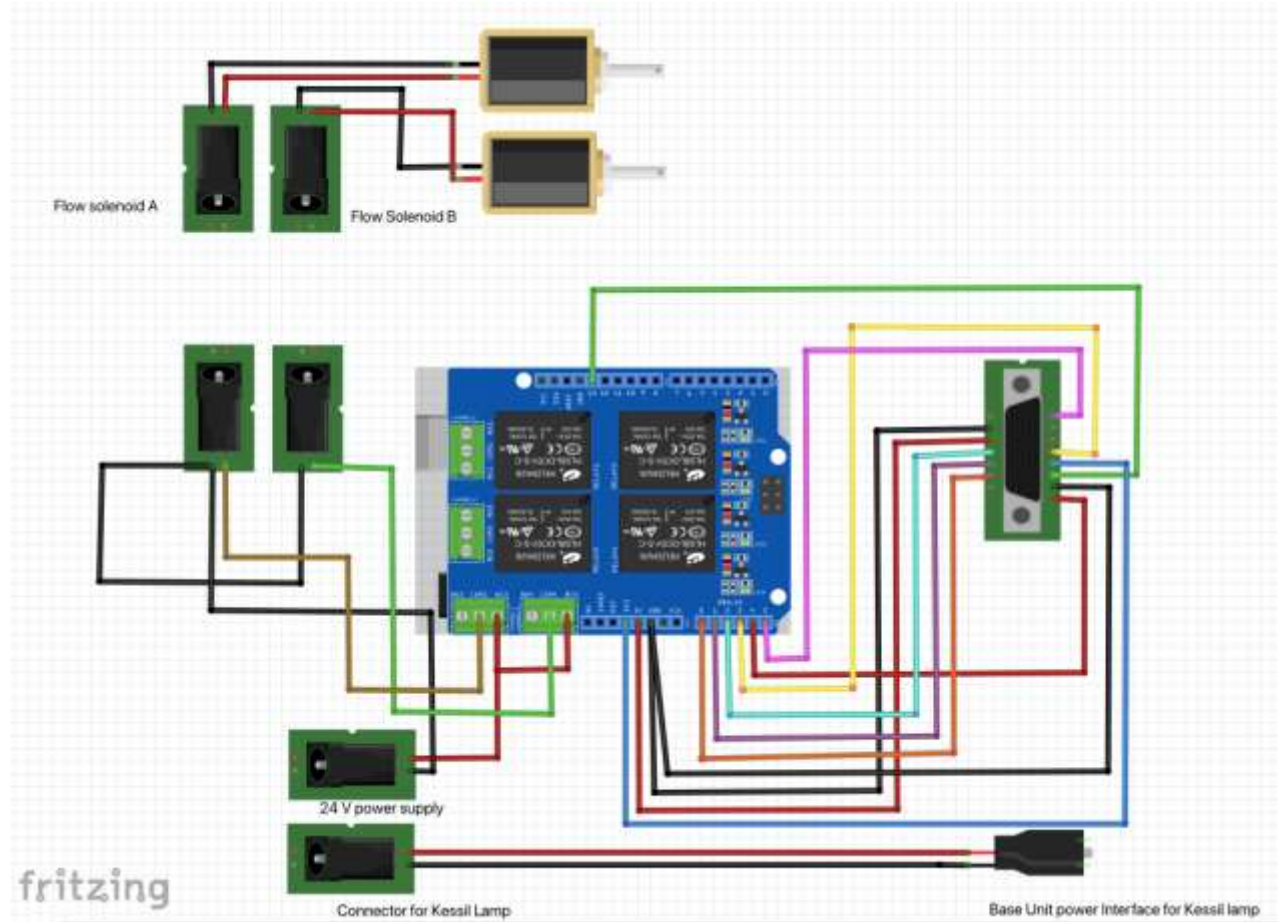

**Supplementary Figure 18:** Fritzing design showing all the wire connections of the Digital base.

The following table shows the wire connections from the Arduino board to the DB15 connector and to the sensors of the three different modules (Flow and temperature sensors). Temperature sensors 1–3 correspond to the three temperature modules, while temperature sensor 4 corresponds to the Phototemperature module.

| Arduino pin | DB15 connector | Sensor pin | Type of sensor                    |
|-------------|----------------|------------|-----------------------------------|
| Analog 5    | 1              | SCL        | Flow sensor                       |
| Not used    | 2              | Not used   | Not used                          |
| Not used    | 3              | Not used   | Not used                          |
| Analog 3    | 4              | SIG        | Temperature sensor 4              |
| 3V          | 5              | VDD        | Flow sensor                       |
| Digital 13  | 6              |            |                                   |
| GND         | 7              | GND        | Temperature sensor 4, flow sensor |
| Analog 4    | 8              | SDA        | Flow sensor                       |
| Not used    | 9              | Not used   | Not used                          |
| GND         | 10             | GND        | Temperature sensor 1-2-3          |
| 5V          | 11             | UCC        | Temperature sensor 1-2-3-4        |
| Analog 2    | 12             | SIG        | Temperature sensor 3              |
| Analog 1    | 13             | SIG        | Temperature sensor 2              |
| Analog 0    | 14             | SIG        | Temperature sensor 1              |
| Not used    | 15             | Not used   | Not used                          |

**Supplementary Table 4:** Wire connections of Relay and Arduino shield.

## S.2.4 Bill of Materials

| Component Number | Designator           | Component                                | Units | Cost per unit – (GBP £) | Total cost | Source of materials |
|------------------|----------------------|------------------------------------------|-------|-------------------------|------------|---------------------|
| 1                | 3D printed structure | Digital flow base                        | 1     | £23.7                   | £23.7      | 3dgbire             |
| 2                | 3D printed structure | Digital flow base lid                    | 1     | £2.94                   | £2.94      | 3dgbire             |
| 3                | 3D printed structure | Digital flow base supports               | 2     | £1.8                    | £3.6       | 3dgbire             |
| 4                | Electronics          | Keyestudio 4 channel Relay shield        | 1     | £19.19                  | £19.19     | Amazon              |
| 5                | Electronics          | Arduino UNO Wifi Rev2                    | 1     | £45                     | £45        | Amazon              |
| 6                | Electronic           | Male 12v DC Power Jack Adapter Connector | 1     | £0.43                   | £0.43      | Amazon              |
| 7                | Electronic           | DB 15 pin connector female               | 1     | £8.99                   | £8.99      | Amazon              |
| 8                | Electronic           | F-M Dupont Wires                         | 7     | £0.05                   | £0.35      | Amazon              |
| 9                | Electronic           | F-F Dupont wire                          | 4     | £0.05                   | £0.2       | Amazon              |
| 10               | Fastener             | M3*4                                     | 1     | £0.02                   | £0.02      | Ali express         |
| 11               | Fastener             | M3*8                                     | 4     | £0.02                   | £0.08      | Ali express         |
| 12               | Fastener             | M3*10                                    | 2     | £0.02                   | £0.04      | Ali express         |

|             |                |
|-------------|----------------|
| Total cost: | <b>£104.54</b> |
|-------------|----------------|

**Supplementary Table 5:** Bill of Materials for the Digital Flow Base component.

## S.2.5 Meguno Interface Platform

The interface platform that was used to communicate between the Arduino microcontroller and the PC is MegunoLink.<sup>5</sup> This platform can read the data from the sensors and display it in a human readable way. The platform software designed contains 3 tabs:

- Connection Manager (**Sup. Fig. 19**): the platform connects to the Arduino through this tab.
- Monitor (**Sup. Fig. 20**)
- Interface panel (**Sup. Fig. 21**):
  - Welcome screen (**Sup. Fig. 21A**)
  - Temperature monitoring (**Sup. Fig. 21B**): plots the data from the three temperature sensors when the Three Temperature sensor module is plugged.
  - Flow rate monitoring (**Sup. Fig. 21C**): this tab plots the data from the flow rate sensor for when the flow rate module is plugged. Before starting to plot the data, the solvent needs to be selected from the list. All calibrations for the different solvents can be found in section 10.4.
  - PhotoTemperature monitoring (**Sup. Fig. 21D**): plots the data from the temperature sensors when the PhotoTemperature sensor module is plugged.

The three monitoring tabs include a start and stop button in order to only record and monitor the sensor data when the button Start is pressed.

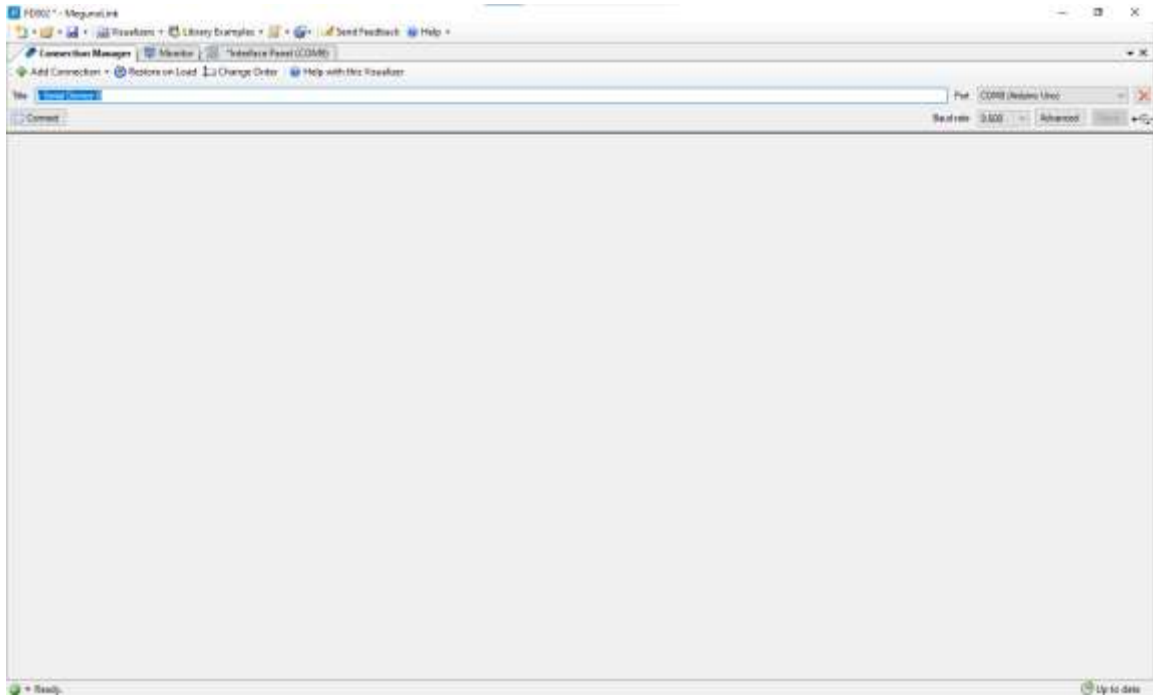

**Supplementary Figure 19: Connection manager tab.**

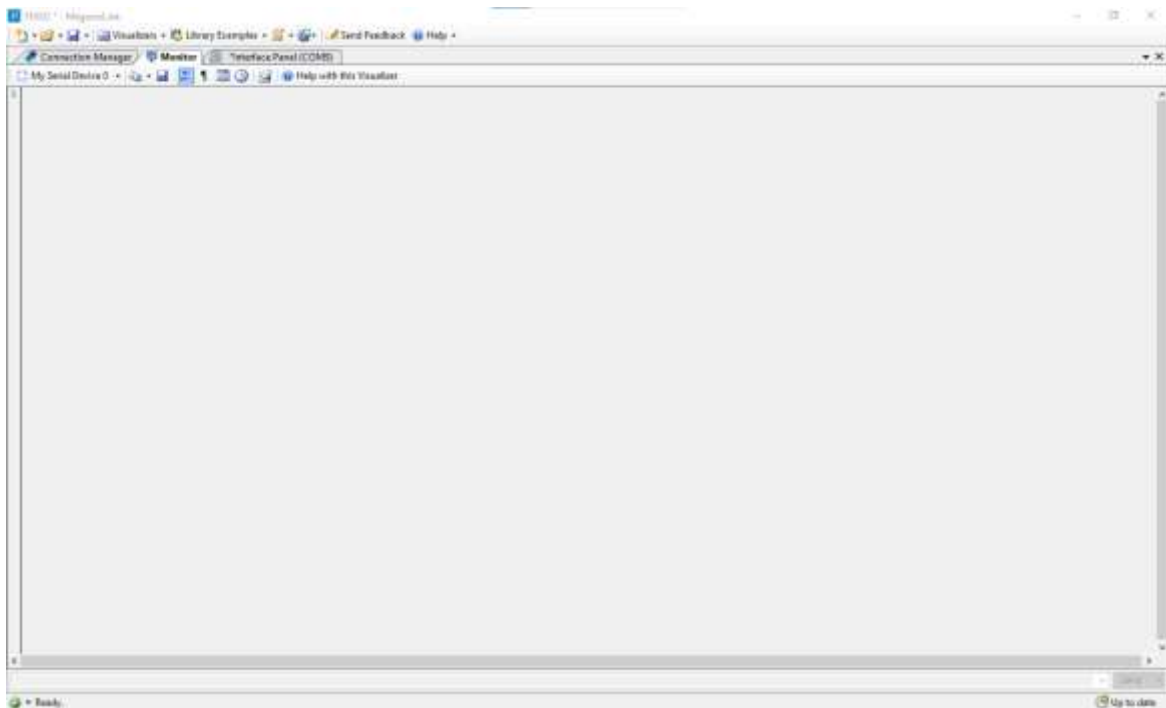

**Supplementary Figure 20: Monitor tab.**



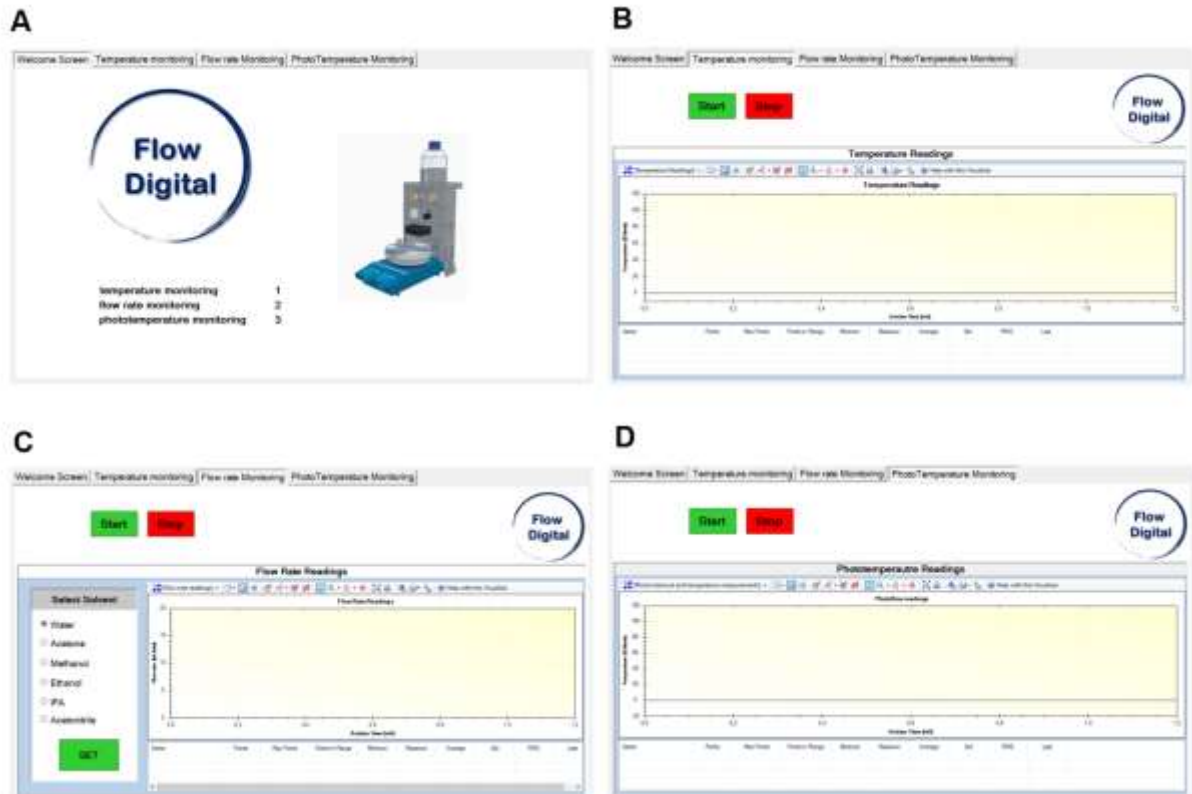

**Supplementary Figure 21:** MegunoLink Interface of the project using the Arduino Uno Board. A) Welcome screen tab. B) Temperature monitoring tab. C) Flow rate monitoring tab. D) Phototemperature monitoring tab.

## S.2.6 Arduino code

The MegunoLink website contains a set of functions and methods that can be added to the Arduino code to send and receive data from the interface panel. The Arduino sketch was written using the Arduino IDE software. The three libraries included to the Arduino code were Wire, MegunoLink and CommandHandler. The wire library is used to establish communication with I2C devices which is used by the flow rate sensor. The communication is established using pins A4 for SDA (Serial Data Pin) and A5 for SCL (Serial Clock pin) on the Arduino Uno board. The MegunoLink library allows the Arduino to send data and commands to the Interface panel and its visualizers like plotting a sensor data. The CommandHandler library, in contrast, decodes and processes the commands received from MegunoLink and send them to the Arduino, such as when pressing a button or from a visualizer in the Interface panel. The library can then call an Arduino function or modify an Arduino variable in response to this command. The maximum number of commands and variables that can be called from the Arduino code is stored in the CommandHandler.h file (**Sup. Fig. 22**). When the library is first downloaded, the default values that can be called are 10 commands, 30 command buffers, and 10 variables. The command store size stores the command names and functions while the variable store size stores the map from command name to variable. If more commands have to be handled, these limits can be increased by editing the file, but this will result in increased memory usage. An additional command will require 4 bytes of RAM, whereas an additional variable will require 8 bytes of RAM on an Arduino.

```

#pragma once
#include <Arduino.h>
#include <Stream.h>

#include "utility/CommandDispatcherBase.h"
#include "utility/StreamParser.h"

template <int MAX_COMMANDS = 200, int CP_SERIAL_BUFFER_SIZE = 150, int MAX_VARIABLES=200> class
CommandHandler : public MLP::CommandDispatcherBase, public MLP::StreamParser
{
    // Array of commands we can match & dispatch.
    MLP::CommandCallback m_Commands[MAX_COMMANDS];

    // Array of variables we can match & set/print
    MLP::VariableMap m_Variables[MAX_VARIABLES];

    // Buffer for data received.
    char m_achBuffer[CP_SERIAL_BUFFER_SIZE];

public:
    CommandHandler(Stream &rSourceStream = Serial, char chStartOfMessage = '!', char chEndOfMessage =
'\r')
        : CommandDispatcherBase(m_Commands, MAX_COMMANDS, m_Variables, MAX_VARIABLES)
        , StreamParser(*(static_cast<MLP::CommandDispatcherBase *>(this)), m_achBuffer,
sizeof(m_achBuffer), rSourceStream, chStartOfMessage, chEndOfMessage)
        {
        }
};

```

**Supplementary Figure 22: CommandHandler file.**

```

#include "MegunoLink.h"
#include "CommandHandler.h"
#include <Wire.h>

#define LEDPIN 13
#define beta 3950
#define resistance 10

int ThermistorPin = 0;
int Vo;
float R1 = 2252;
float logR2, R2, T;
float A = 1.484778004e-03, B =
2.348962910e-04, C = 1.006037158e-07;
unsigned long StartMillis = 0;
float Solvent;
float TotalMillis;
float Eflowrate;
boolean TemperatureStart = false;
boolean TemperatureStop;
boolean FlowStart = false;
boolean FlowStop;
boolean PhotoStart = false;
boolean PhotoStop;
const int ADDRESS = 0x08;
const float SCALE_FACTOR_FLOW =
500.0;
uint16_t sensor_flow_value;
CommandHandler<>
SerialCommandHandler;
long LastSent;

const unsigned SendInterval = 200;

XYPlot TempPlot("Temperature Readings"),
FlowPlot ("Flow rate readings"),
PhotoPlot("Photochemical and temperature
measurements");
InterfacePanel MyPanel;

void
Cmd_SETSYSTEM(CommandParameter
&Parameters)
{Solvent=Parameters.NextParameterAsInte
ger(Solvent); }

```

```

void
Cmd_TemperatureStart(CommandParamet
er &params){
    TemperatureStart = true; }

void
Cmd_TemperatureStop(CommandParamete
r &params){
    TemperatureStart = false; }

void Cmd_FlowStart(CommandParameter
&params){
    FlowStart = true; }

void Cmd_FlowStop(CommandParameter
&params){
    FlowStart = false; }

void Cmd_PhotoStart(CommandParameter
&params){
    PhotoStart = true; }

void Cmd_PhotoStop(CommandParameter
&params){
    PhotoStart = false; }

void setup(){

Serial.begin(9600);
Wire.begin();
Serial.println("MegunoLink Pro - Turning
Solenoids on and off");
Serial.println("-----");
SerialCommandHandler.AddCommand(F("S
ETSYSTEM"), Cmd_SETSYSTEM);
SerialCommandHandler.AddCommand(F("T
emperatureStart"), Cmd_TemperatureStart);
SerialCommandHandler.AddCommand(F("T
emperatureStop"), Cmd_TemperatureStop);
SerialCommandHandler.AddCommand(F("F
lowStart"), Cmd_FlowStart);
SerialCommandHandler.AddCommand(F("F
lowStop"), Cmd_FlowStop);
SerialCommandHandler.AddCommand(F("P
hotoStart"), Cmd_PhotoStart);
SerialCommandHandler.AddCommand(F("P
hotoStop"), Cmd_PhotoStop);

```

```

LastSent = millis();

TempPlot.SetSeriesProperties("ADCValue1"
, Plot::Red, Plot::Solid, 2, Plot::Square);
TempPlot.SetSeriesProperties("ADCValue2"
, Plot::Blue, Plot::Solid, 2, Plot::Square);
TempPlot.SetSeriesProperties("ADCValue3"
, Plot::Green, Plot::Solid, 2, Plot::Square);
FlowPlot.SetSeriesProperties("Flow rate",
Plot::Magenta, Plot::Solid, 5, Plot::Circle);
PhotoPlot.SetSeriesProperties("ADCValue4"
, Plot::Black, Plot::Solid, 2, Plot::Triangle);

int ret;
do {
  Wire.beginTransmission(ADDRESS);
  Wire.write(0xFE);
  ret=Wire.endTransmission();
} while (ret !=0);
}

void loop() {

SerialCommandHandler.Process();

if ((TemperatureStart == true)&& ((millis() -
LastSent) > SendInterval)) {
  LastSent=millis();
  long temp1 =1023 - analogRead (A0);
  float sensor1 = beta /(log(((1025.0 * 10 /
temp1) - 10) / 10) + beta / 298.0) - 273.0;
  long temp2 =1023 - analogRead (A1);
  float sensor2 = beta /(log(((1025.0 * 10 /
temp2) - 10) / 10) + beta / 298.0) - 273.0;
  long temp3 =1023 - analogRead (A2);
  float sensor3 = beta /(log(((1025.0 * 10 /
temp3) - 10) / 10) + beta / 298.0) - 273.0;
  TempPlot.SendData("ADCValue1",
millis(),sensor1);
  TempPlot.SendData("ADCValue2",
millis(),sensor2);
  TempPlot.SendData("ADCValue3",
millis(),sensor3);
}
if (TemperatureStop== false){
}

if ((FlowStart == true)&& ((millis() -
LastSent) > SendInterval)&& (Solvent == 1))
{

```

```

LastSent=millis();
int ret;
Wire.beginTransmission(ADDRESS);
Wire.write(0x36);
Wire.write(0x08);
ret = Wire.endTransmission();
Wire.requestFrom(ADDRESS, 9);
sensor_flow_value = Wire.read() << 8;
sensor_flow_value |= Wire.read();
float flow_value =
((int16_t)sensor_flow_value)/SCALE_FACT
OR_FLOW;
  FlowPlot.SendData("Flow rate",
millis(),flow_value);
}

else if ((FlowStart == true)&& ((millis() -
LastSent) > SendInterval)&& (Solvent == 2))
{
  LastSent=millis();
  int ret;
  Wire.beginTransmission(ADDRESS);
  Wire.write(0x36);
  Wire.write(0x08);
  ret = Wire.endTransmission();
  Wire.requestFrom(ADDRESS, 9);
  sensor_flow_value = Wire.read() << 8;
  sensor_flow_value |= Wire.read();
  float flow_value = ((5*(pow(10,(-
5))))*(pow((int16_t)sensor_flow_value,2))+0
.0051*sensor_flow_value)+0.0215);
  FlowPlot.SendData("Flow rate",
millis(),flow_value);
}

else if ((FlowStart == true)&& ((millis() -
LastSent) > SendInterval)&& (Solvent == 3))
{
  LastSent=millis();
  int ret;
  Wire.beginTransmission(ADDRESS);
  Wire.write(0x36);
  Wire.write(0x08);
  ret = Wire.endTransmission();
  Wire.requestFrom(ADDRESS, 9);
  sensor_flow_value = Wire.read() << 8;
  sensor_flow_value |= Wire.read();
  float flow_value = (pow(10,(-
5))*(pow((int16_t)sensor_flow_value,2))+0.
0071*sensor_flow_value)-0.0918);

```

```

    FlowPlot.SendData("Flow rate",
millis(),flow_value);
    FlowPlot.SendData("sensor",
millis(),sensor_flow_value);
}

else if ((FlowStart == true)&& ((millis() -
LastSent) > SendInterval)&& (Solvent == 4))
{
    LastSent=millis();
    int ret;
    Wire.beginTransaction(ADDRESS);
    Wire.write(0x36);
    Wire.write(0x08);
    ret = Wire.endTransmission();
    Wire.requestFrom(ADDRESS, 9);
    sensor_flow_value = Wire.read() << 8;
    sensor_flow_value |= Wire.read();
    float flow_value = ((2*(pow(10,(-
5))))*(pow((int16_t)sensor_flow_value,2))+(0
.0085*sensor_flow_value)-0.1453);
    FlowPlot.SendData("Flow rate",
millis(),flow_value);
}

else if ((FlowStart == true)&& ((millis() -
LastSent) > SendInterval)&& (Solvent == 5))
{
    LastSent=millis();
    int ret;
    Wire.beginTransaction(ADDRESS);
    Wire.write(0x36);
    Wire.write(0x08);
    ret = Wire.endTransmission();
    Wire.requestFrom(ADDRESS, 9);
    sensor_flow_value = Wire.read() << 8;
    sensor_flow_value |= Wire.read();
    float flow_value = ((4*(pow(10,(-
5))))*(pow((int16_t)sensor_flow_value,2))+(0
.0054*sensor_flow_value)-0.0335);

```

```

    FlowPlot.SendData("Flow rate",
millis(),flow_value);
}

else if ((FlowStart == true)&& ((millis() -
LastSent) > SendInterval)&& (Solvent == 6))
{
    LastSent=millis();
    int ret;
    Wire.beginTransaction(ADDRESS);
    Wire.write(0x36);
    Wire.write(0x08);
    ret = Wire.endTransmission();
    Wire.requestFrom(ADDRESS, 9);
    sensor_flow_value = Wire.read() << 8;
    sensor_flow_value |= Wire.read();
    float flow_value = ((3*(pow(10,(-
5))))*(pow((int16_t)sensor_flow_value,2))+(0
.0022*sensor_flow_value)+0.1508);
    FlowPlot.SendData("Flow rate",
millis(),flow_value);
    FlowPlot.SendData("sensor",
millis(),sensor_flow_value);
}

if ((PhotoStart == true)&& ((millis() -
LastSent) > SendInterval)) {
    LastSent=millis();
    long temp4 =1023 - analogRead (A3);
    float sensor4 = beta /(log(((1025.0 * 10 /
temp4) - 10) / 10) + beta / 298.0) - 273.0;
    PhotoPlot.SendData("ADCValue4",
millis(),sensor4);
}
if (PhotoStop== false){
}
}

```

### S.3 Phototemperature sensor Module

The Phototemperature Module was designed with one temperature adapter and a lamp support. The module fits perfectly into the Digital flow base, which will connect to the Arduino through the DB15 Male connector. The lid was designed to have a hole in order to be able to plug and unplug the temperature sensor to the adapter. The system was modified from that described previously.<sup>6</sup>

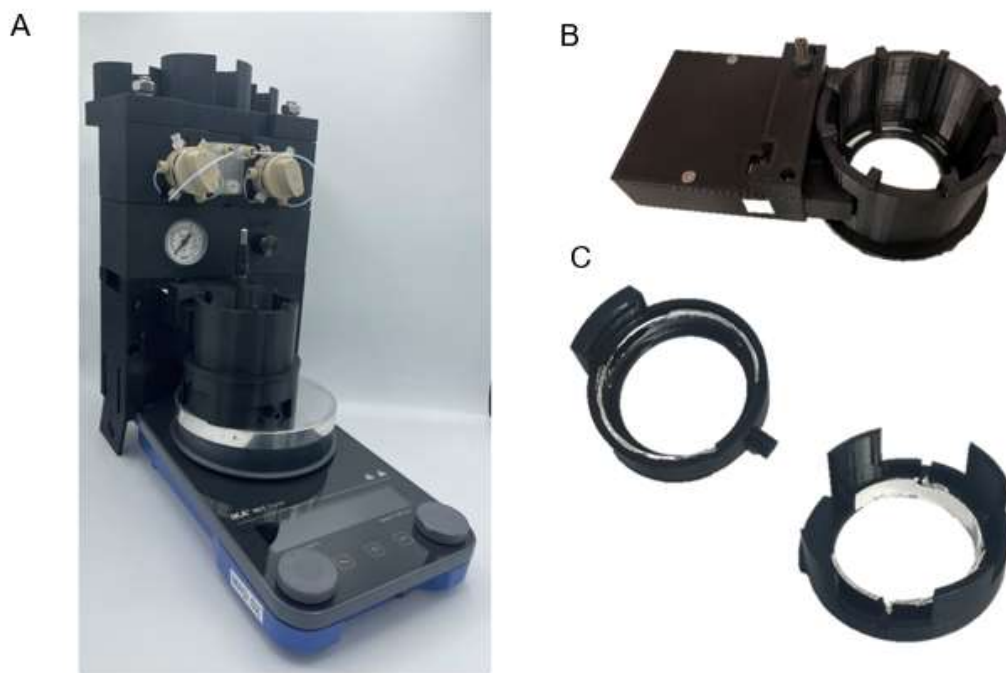

**Supplementary Figure 23:** A) Phototemperature module inserted in the digital flow system. B) Phototemperature module. C) Reactor holder and air cooler.

#### S.3.1 Ultimaker Cura settings and Tinkercad designs for 3D printed components of the Phototemperature Sensor Module

Once the design of the components was completed in Tinkercad, they were exported individually as an STL (Standard Tessellation Language) file and uploaded to Cura software. The printing settings used to 3D print the following component are shown in the tables from section 7.1 and 7.2. Finally, the models were sliced and USB-connected to the printer.

### S.3.1.1 Phototemperature Sensor Module

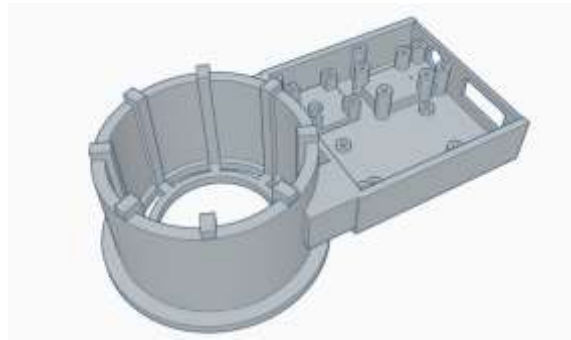

**Supplementary Figure 24:** Tinkercad design illustrating the planned Phototemperature Sensor Module.

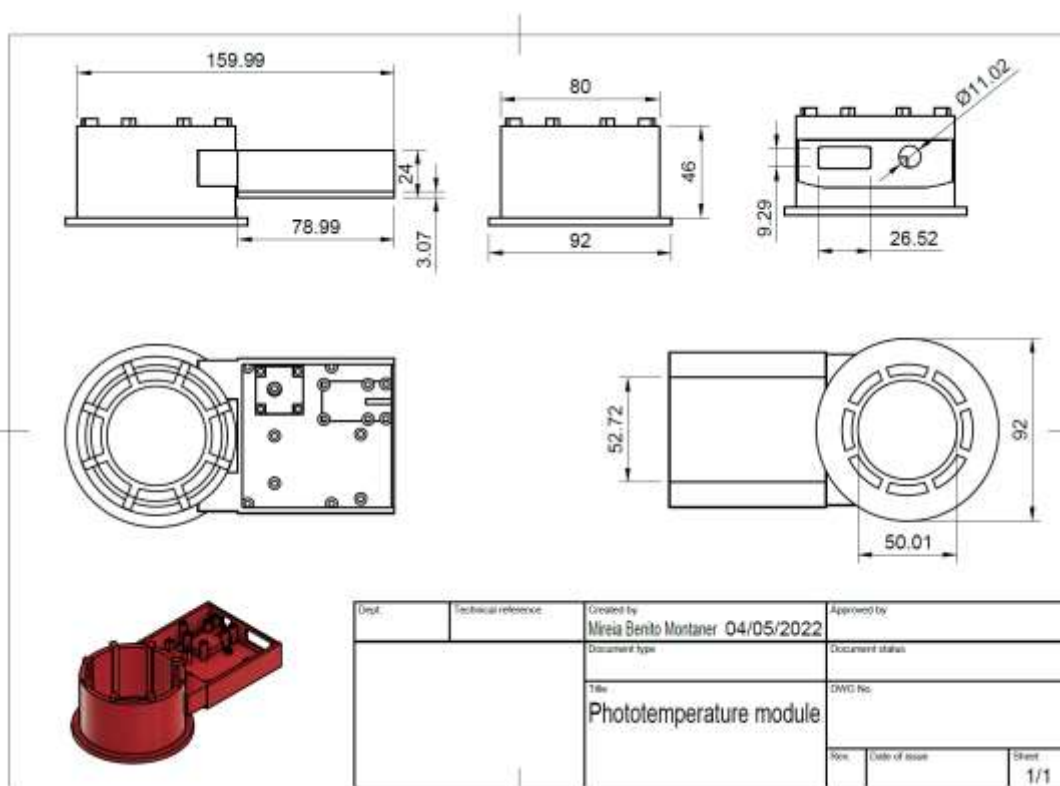

**Supplementary Figure 25:** Technical Drawing Showing the Dimensions of the Phototemperature Sensor Module.

|                         |                 |
|-------------------------|-----------------|
| <b>Material</b>         | <b>PLA</b>      |
| <b>Time</b>             | 18 h 31 min     |
| <b>Quantity</b>         | 131 g – 16.53 m |
| <b>Profile</b>          | Normal 0.15 mm  |
| <b>Support required</b> | Yes             |

**Supplementary Table 6:** Ultimaker Cura Settings for 3D printing of the Phototemperature sensor module.



S.3.1.2 Lid for the Phototemperature Sensor Module

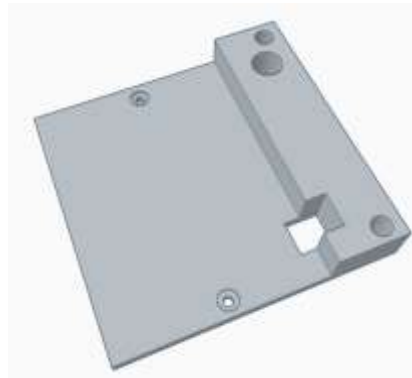

**Supplementary Figure 26:** Tinkercad design illustrating the planned lid for the Phototemperature Module sensor.

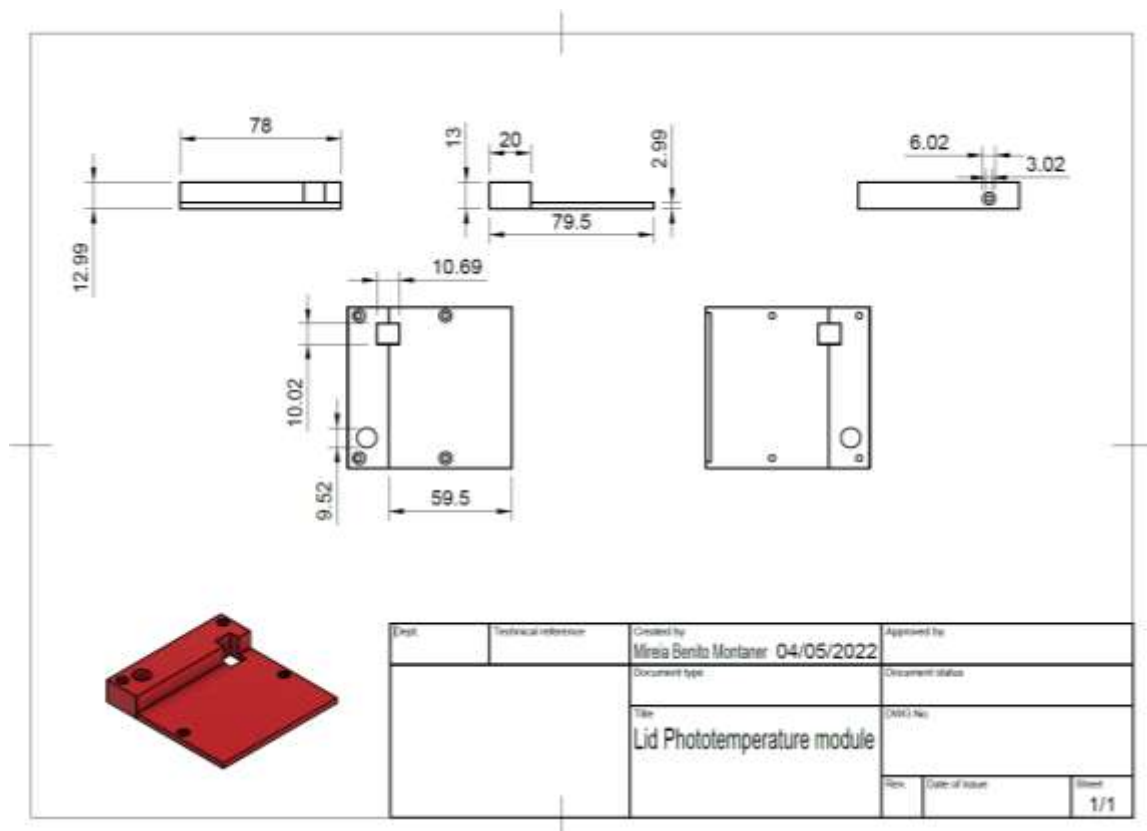

**Supplementary Figure 27:** Technical Drawing Showing the Dimensions of the Phototemperature Sensor Module lid.

|                         |               |
|-------------------------|---------------|
| <b>Material</b>         | <b>PLA</b>    |
| <b>Time</b>             | 2 h 43 min    |
| <b>Quantity</b>         | 31 g – 3.95 m |
| <b>Profile</b>          | Fast 0.2 mm   |
| <b>Support required</b> | No            |

**Supplementary Table 7:** Ultimaker Cura Settings for 3D printing of the lid for the Phototemperature Sensor Module.

S.3.1.3 Reactor Support and air cooling system bottom part

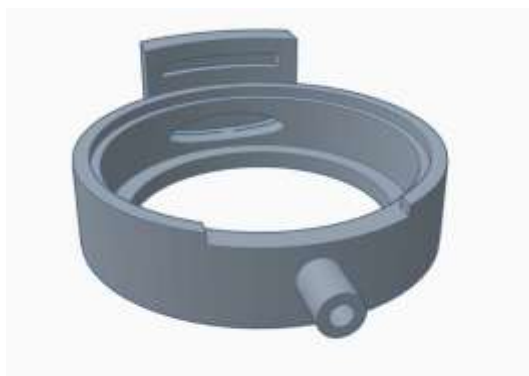

**Supplementary Figure 28:** Tinkercad design illustrating the planned Reactor Support and air cooling system bottom part.

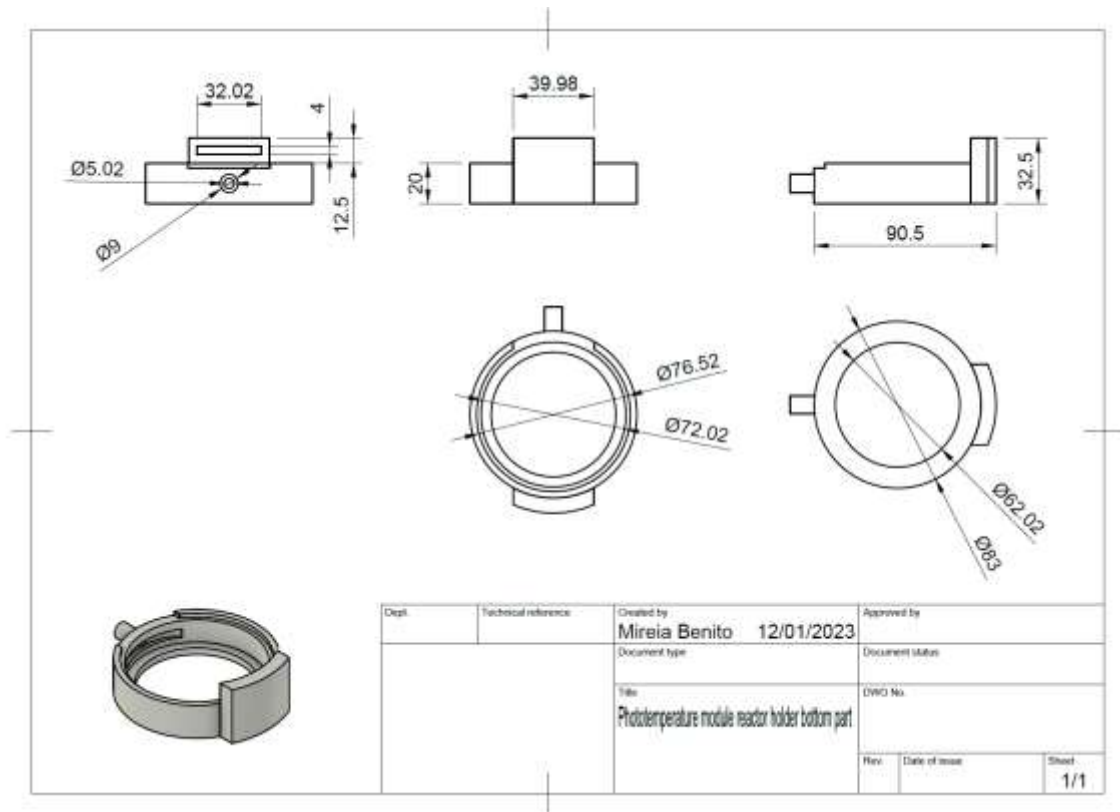

**Supplementary Figure 29:** Technical Drawing Showing the Dimensions of the Phototemperature Module reactor holder bottom part.

|                         |               |
|-------------------------|---------------|
| <b>Material</b>         | <b>PLA</b>    |
| <b>Time</b>             | 3 h 20 min    |
| <b>Quantity</b>         | 37 g – 4.73 m |
| <b>Profile</b>          | Fast 0.2 mm   |
| <b>Support required</b> | No            |

**Supplementary Table 8:** Ultimaker Cura Settings for 3D printing of the Reactor Support and air cooling system bottom part.

S.3.1.4 Reactor Support and air cooling system top part

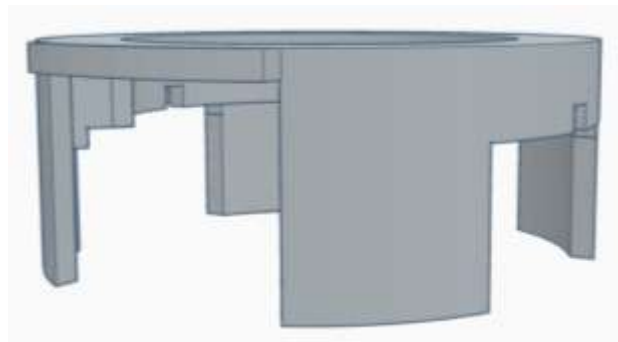

**Supplementary Figure 30:** Tinkercad design illustrating the planned Reactor Support and air cooling system top part.

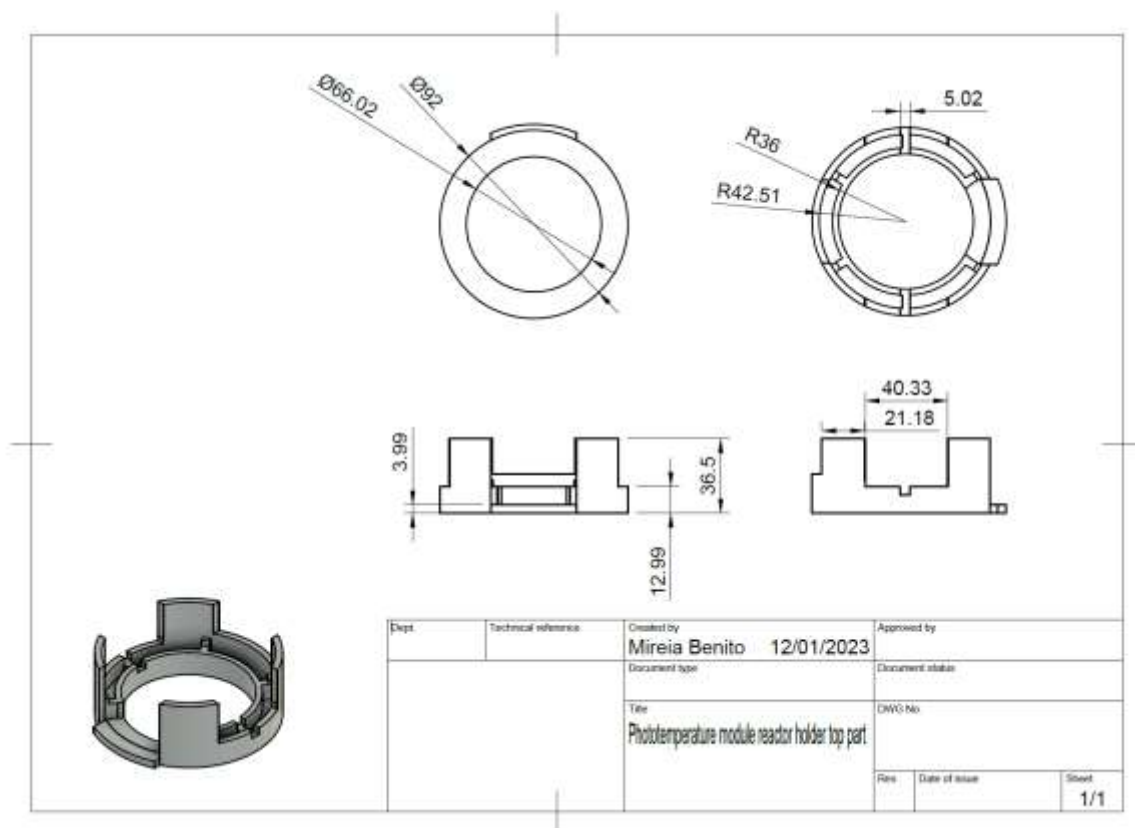

**Supplementary Figure 31:** Technical Drawing Showing the Dimensions of the Phototemperature Module reactor holder top part.

|                         |               |
|-------------------------|---------------|
| <b>Material</b>         | <b>PLA</b>    |
| <b>Time</b>             | 3 h 32 min    |
| <b>Quantity</b>         | 40 g – 5.05 m |
| <b>Profile</b>          | Fast 0.2 mm   |
| <b>Support required</b> | No            |

**Supplementary Table 9:** Ultimaker Cura Settings for 3D printing of the Reactor Support and air cooling system top part.

### S.3.3 Assembly of the 3D printed and electronic components of the Phototemperature Sensor Module

To assemble the Digital Flow base, the 3D printed components must first be printed and ready for assembly. The diagram below illustrates the components required to set up the module (**Sup. Fig. 32**).

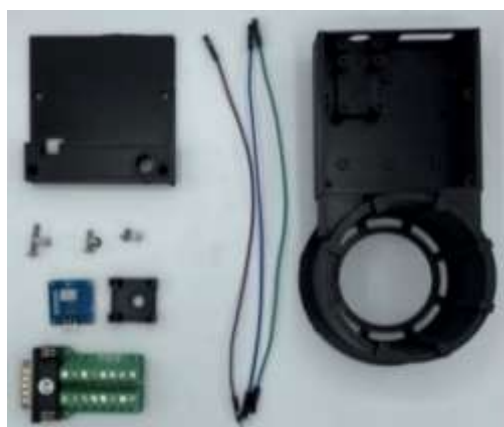

**Supplementary Figure 32:** 3D printed and electronic components of the Phototemperature sensor Module.

**Step 1:** The DB15 pin connector male is secured with two M3\*5 screws to the base of the Phototemperature sensor Module.

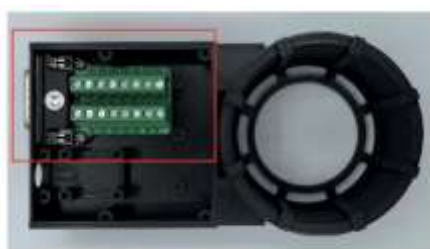

**Supplementary Figure 33:** Installation of 15 pin male connector (Step 1).

**Step 2:** The support for the Temperature sensor is secured to the base of the Phototemperature sensor Module.

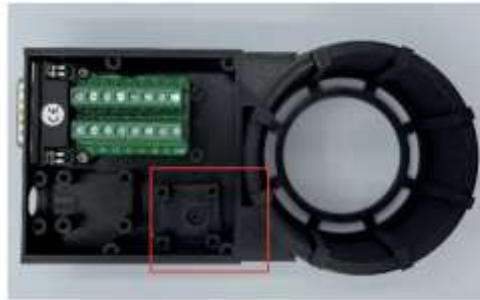

**Supplementary Figure 34:** Installation of Step 2.

**Step 3:** The Temperature sensor adapter is secured to the base of the Phototemperature sensor Module.

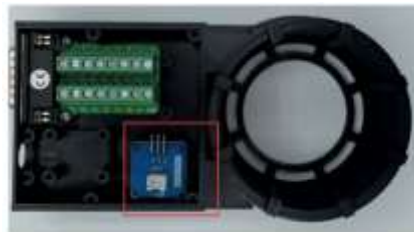

**Supplementary Figure 35:** Installation of Step 3.

**Step 4:** Wiring is completed in accordance with the Fritzing diagram (**Sup. Fig. 18 and Table 4**).

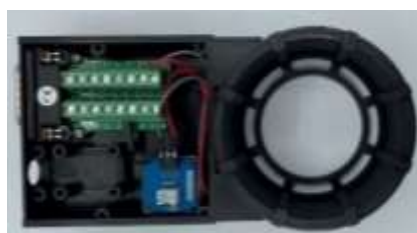

**Supplementary Figure 36:** Wire connections of the sensor.

**Step 5:** The lid is secured to the base unit with two M3\*12 (middle) and two M3\*16 screws.

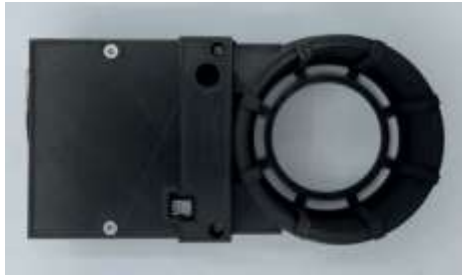

**Supplementary Figure 37:** completion of flow rate sensor module.

**Step 6:** cover the internal parts of the two reactor supports with aluminum film.

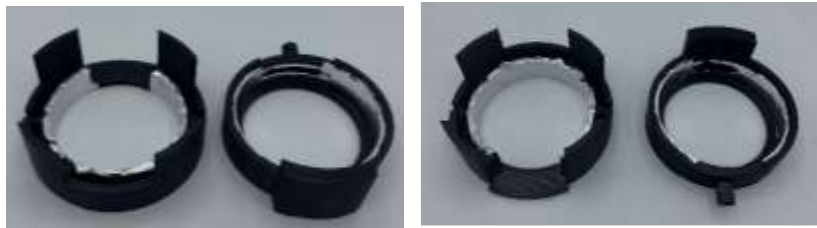

**Supplementary Figure 38:** reactor support covered in reflective aluminium film.

**Step 7:** add mirror to the reactor Support and air cooling system bottom part.

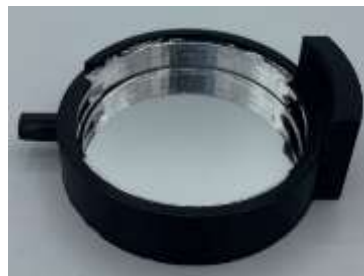

**Supplementary Figure 39:** reactor support bottom part with mirror.

**Step 8:** place the 3D printer PP reactor on top of the reactor Support and air cooling system bottom part.

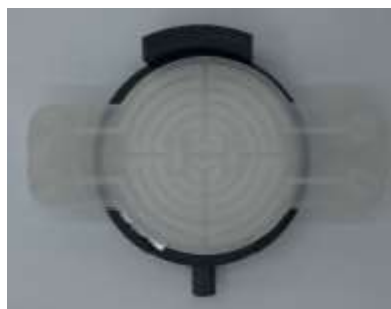

**Supplementary Figure 40:** 3D printed reactor on top of the reactor support bottom part.

**Step 7:** add the reactor Support and air cooling system top part on top of the 3D printed reactor. Once it has been assembled, the PhotoTemp module can be placed on top (Sup. Fig. 23A).

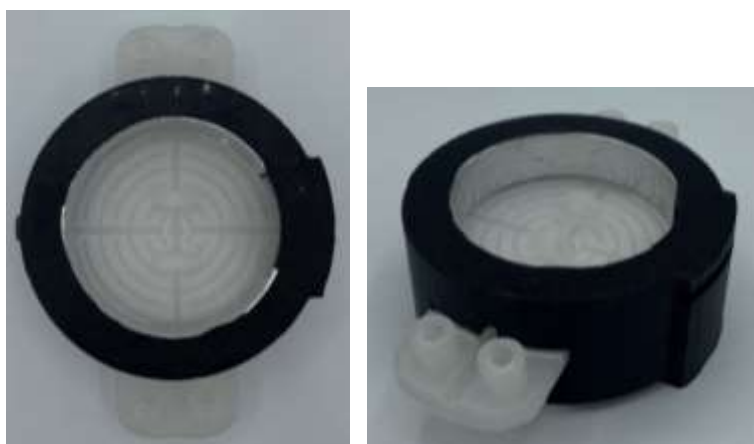

**Supplementary Figure 41:** reactor support covered in reflective aluminium film.

### S.3.4 Bill of Materials

| Component Number | Designator           | Component                                  | Units | Cost per unit – (GPB - £) | Total cost - (GPB - £) | Source of materials |
|------------------|----------------------|--------------------------------------------|-------|---------------------------|------------------------|---------------------|
| 1                | 3D printed Structure | Temperature sensor module                  | 1     | £7.08                     | £7.08                  | 3dgbire             |
| 2                | 3D printed Structure | Temperature sensor module lid              | 1     | £1.5                      | £1.5                   | 3dgbire             |
| 3                | 3D printed Structure | Support and air cooling system top part    | 1     | £2.03                     | £2.03                  | 3dgbire             |
| 4                | 3D printed Structure | Support and air cooling system bottom part | 1     | £2.16                     | £2.16                  | 3dgbire             |
| 5                | Electronic           | Female 12v DC Power Jack Adapter Connector | 1     | £0.43                     | £0.43                  | Amazon              |
| 6                | Electronic           | DB 15 pin connector male                   | 1     | £5.51                     | £5.51                  | Amazon              |



|    |            |                                                      |      |       |       |             |
|----|------------|------------------------------------------------------|------|-------|-------|-------------|
| 7  | Electronic | Waterproof NTC Thermistor Temperature Adapter Module | 1    | £0.93 | £0.93 | Ali express |
| 8  | Electronic | F-M Dupont Wires                                     | 3    | £0.05 | £0.15 | Amazon      |
| 9  | Fastener   | M3*12                                                | 2    | £0.02 | £0.04 | Ali express |
| 10 | Fastener   | M3*16                                                | 2    | £0.02 | £0.04 | Ali express |
| 11 | Fastener   | M3*5                                                 | 2    | £0.02 | £0.04 | Ali express |
| 12 | Mirror     | Circular mirror                                      | 1    | £0.99 | £0.99 | Amazon      |
| 13 | Tape       | Aluminium tape                                       | 20cm | £0.02 | £0.02 | Amazon      |

|             |               |
|-------------|---------------|
| Total cost: | <b>£20.92</b> |
|-------------|---------------|

**Supplementary Table 10:** Bill of Materials for the Phototemperature Sensor Module.

## **S.4 Flow rate sensor Module**

### **S.4.1 Design of the flow rate Sensor Module**

The Flow rate Module was designed with one SLF3C-1300F flow rate sensor. It contains two holes on the front side to connect the system flow path to the sensor without requiring the module to be modified. It also connects to the Arduino in the Digital flow base, through the DB15 Male connector.

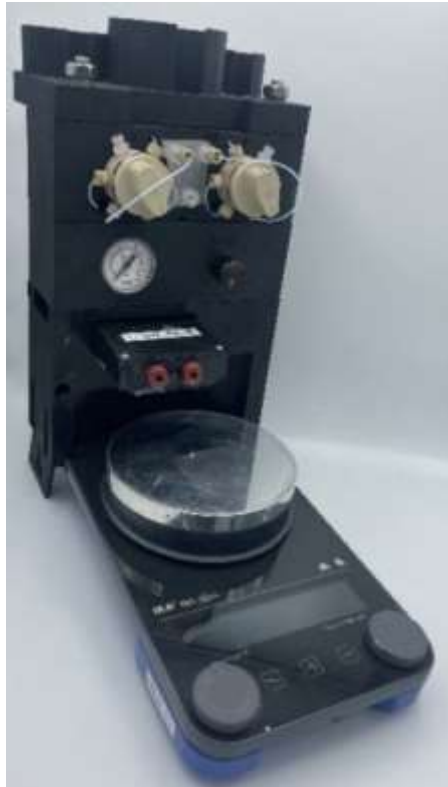

**Supplementary Figure 42:** Flow rate module inserted in the digital flow system.

#### **S.4.2 Ultimaker Cura settings and Tinkercad designs for 3D printed components of the flow rate sensor module**

Once the design of the components was completed in Tinkercad, they were exported individually as an STL (Standard Tessellation Language) file and uploaded to Cura software. The printing settings used to 3D print the following component are shown in the tables from section 7.1. Finally, the models were sliced and USB-connected to the printer.

S.4.2.1 Flow rate Sensor Module

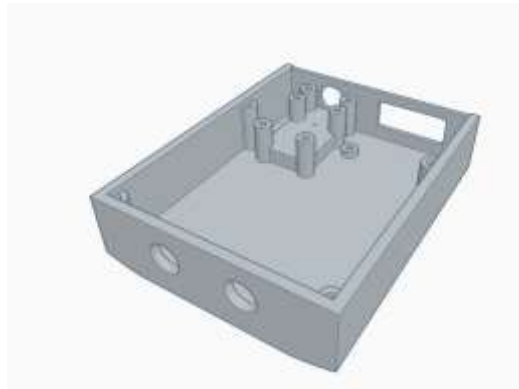

**Supplementary Figure 43:** Tinkercad design illustrating the planned flow rate Sensor Module.

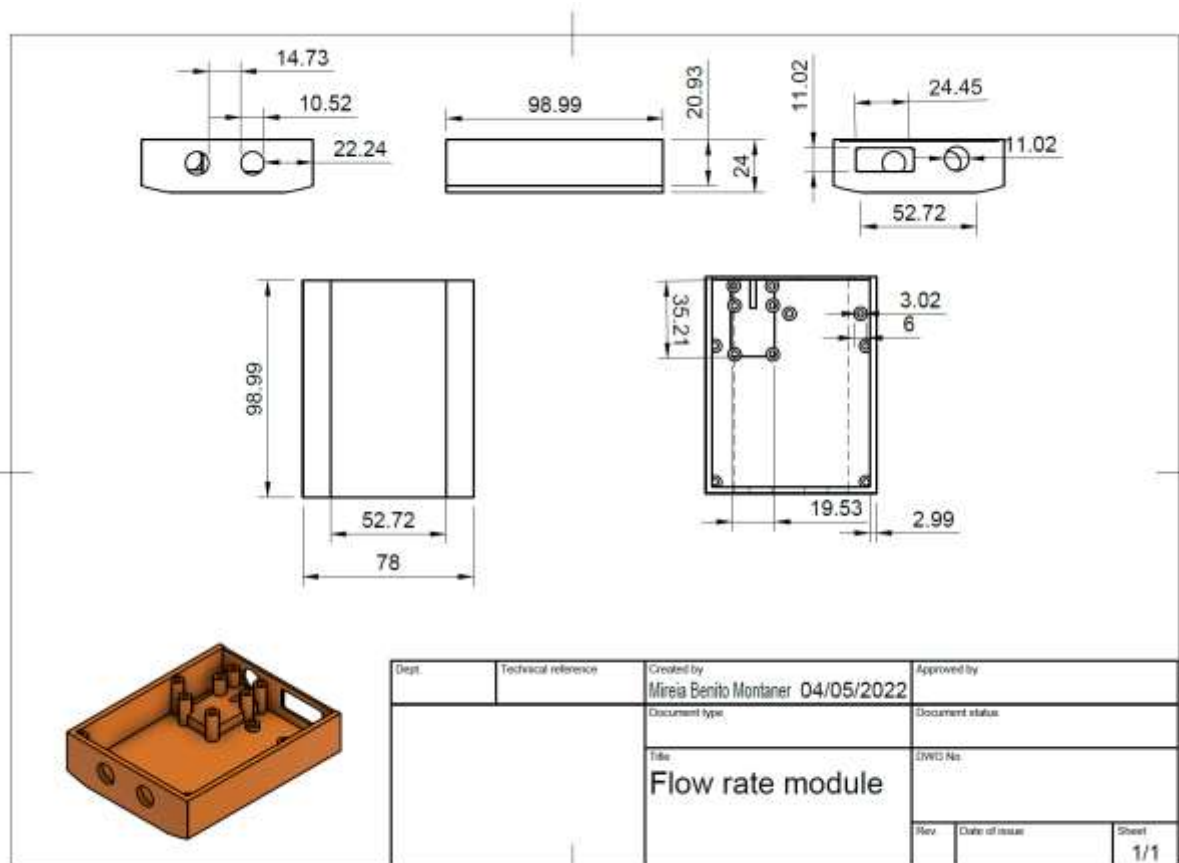

**Supplementary Figure 44:** Technical Drawing Showing the Dimensions of the flow rate sensor Module.

|                         |                |
|-------------------------|----------------|
| <b>Material</b>         | <b>PLA</b>     |
| <b>Time</b>             | 8 h 15 min     |
| <b>Quantity</b>         | 56 g – 7.05 m  |
| <b>Profile</b>          | Normal 0.15 mm |
| <b>Support required</b> | No             |

**Supplementary Table 11:** Ultimaker Cura Settings for 3D printing of the flow rate sensor module.

#### S.4.2.2 Lid for the Flow rate sensor module

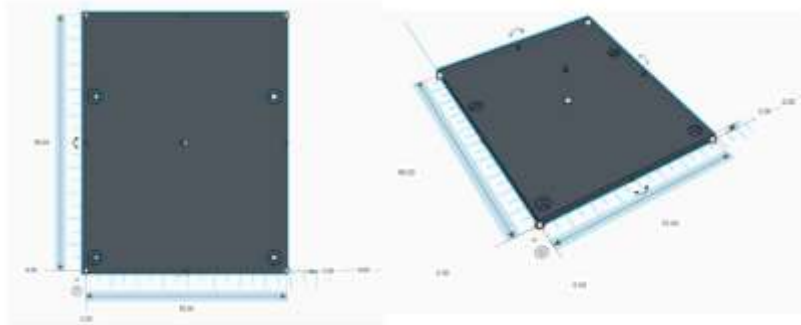

**Supplementary Figure 45:** Tinkercad design illustrating the planned lid for the flow rate sensor Module.

|                         |               |
|-------------------------|---------------|
| <b>Material</b>         | <b>PLA</b>    |
| <b>Time</b>             | 2 h 30 min    |
| <b>Quantity</b>         | 28 g – 3.58 m |
| <b>Profile</b>          | Fast 0.2 mm   |
| <b>Support required</b> | No            |

**Supplementary Table 12:** Ultimaker Cura Settings for 3D printing of the lid for the flow rate Sensor Module lid.

### S.4.3 Assembly of the 3D printed and electronic components of the flow rate sensor module

To assemble the Digital Flow base, the 3D printed components must first be printed and ready for assembly. The diagram below illustrates the components required to set up the module (**Sup. Fig. 46**).

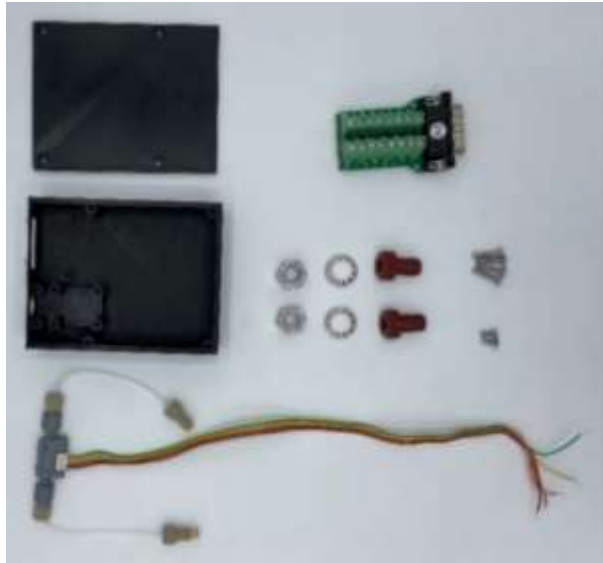

**Supplementary Figure 46:** 3D printed and electronic components of the flow rate sensor Module.

**Step 1:** The 15 pin connector (male) is secured with two M3\*5 screws to the base of the Flow rate sensor Module.

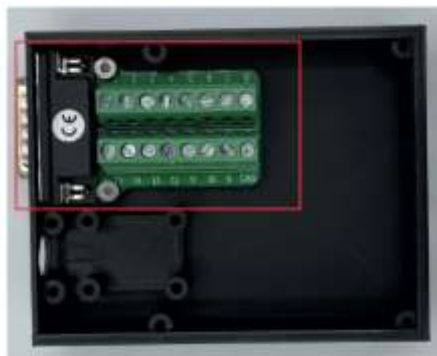

**Supplementary Figure 47:** Installation of 15 pin male connector (Step 1).

**Step 2:** slide the union/manifold body through the two front holes, thread the lock washer and nut onto the union/manifold. Tighten the nut until snug.

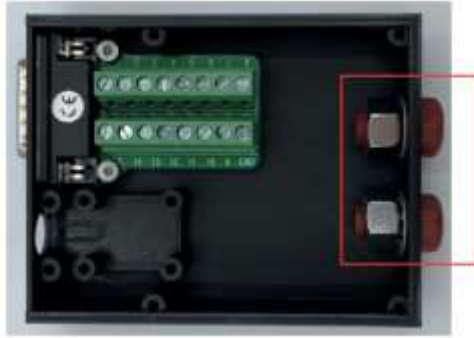

**Supplementary Figure 48:** Installation of Step 2.

**Step 3:** Wiring is completed in accordance with the Fritzing diagram (**Sup. Fig. 18** and **Table 4**).

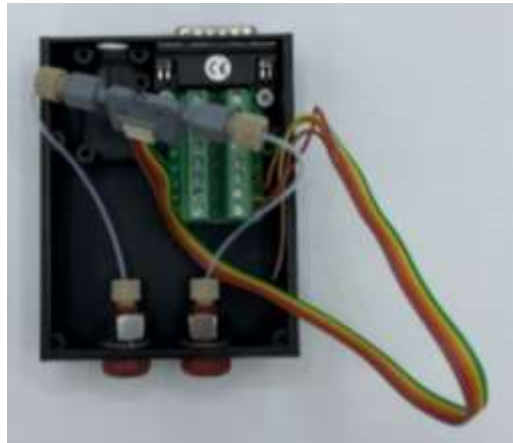

**Supplementary Figure 49:** Wire connections of the sensor.

**Step 4:** The lid is secured to the base unit with four M3\*14 screws.

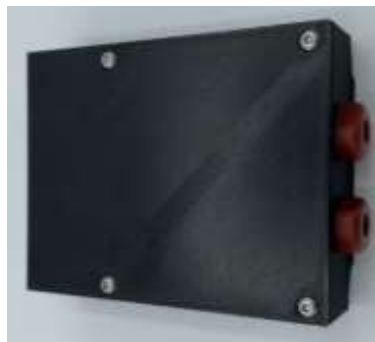

**Supplementary Figure 50:** completion of flow rate sensor module.

## S.4.4 Bill of Materials

| Component Number | Designator           | Component                     | Unit | Cost per unit – (GPB - £) | Total cost -   | Source of materials |
|------------------|----------------------|-------------------------------|------|---------------------------|----------------|---------------------|
| 1                | 3D printed Structure | Temperature sensor module     | 1    | £2.88                     | £2.88          | 3dgbire             |
| 2                | 3D printed Structure | Temperature sensor module lid | 1    | £1.44                     | £1.44          | 3dgbire             |
| 3                | Electronic           | 15 pin connector male         | 1    | £5.51                     | £5.51          | Amazon              |
| 4                | Electronic           | SLF3S-1300F flow rate sensor  | 1    | 194.18                    | £194.18        | Digikey.co.uk       |
| 5                | Fastener             | Union body                    | 2    | £20.78                    | £41.56         | Cole-palmer         |
| 6                | Fastener             | Lock washer                   |      |                           |                |                     |
| 7                | Fastener             | Nut                           |      |                           |                |                     |
| 8                | Fastener             | M3*14                         | 4    | £0.02                     | £0.08          | Ali express         |
| 9                | Fastener             | M3*5                          | 2    | £0.02                     | £0.04          | Ali express         |
| Total cost:      |                      |                               |      |                           | <b>£245.69</b> |                     |

**Supplementary Table 13:** Bill of Materials for the flow rate sensor Module.

## S.5 Three Temperature sensor Module

### S.5.1 Design of the flow rate Temperature Sensor Module

The Temperature Sensor Module was designed to accommodate three temperature sensor adaptors. The module fits into the Digital flow base, which connects to the Arduino through the DB15 Male connector. The lid was designed to have the three holes in order to be able to plug and unplug the waterproof temperature sensors to the adaptors.

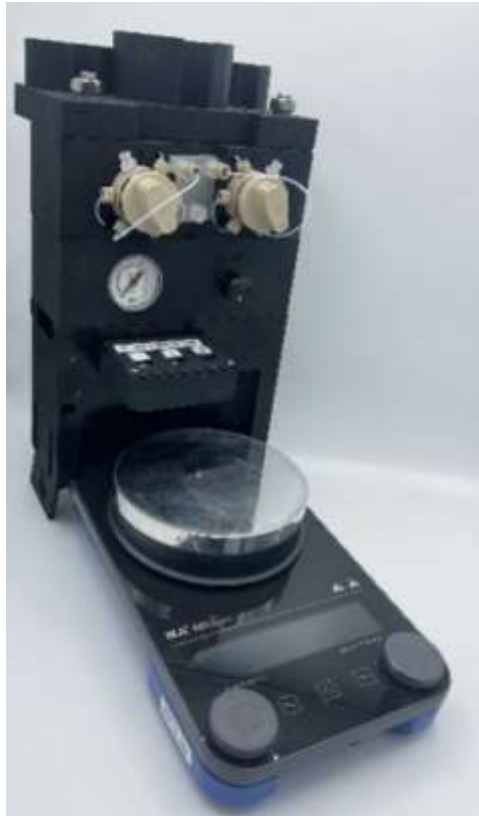

**Supplementary Figure 51:** Flow rate module inserted in the digital flow system.

### **S.5.2 Ultimaker Cura settings and Tinkercad designs for 3D printed components of the 3 Temperature Sensor Module**

Once the design of the components was complete in Tinkercad, they were exported individually as an STL (Standard Tessellation Language) file and uploaded to Cura software. The printing settings used to 3D print the following component are shown in the tables from section 7.1. Finally, the models were sliced and USB-connected to the printer.



### S.5.2.1 Three Temperature Sensor Module

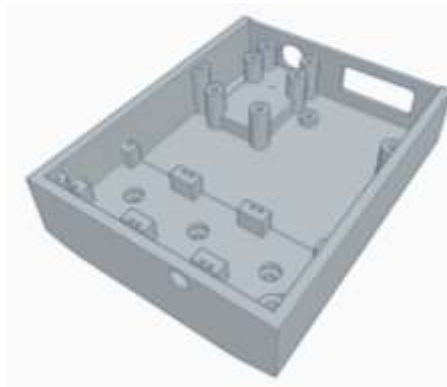

**Supplementary Figure 52:** Tinkercad design illustrating the planned Three Temperature Sensor Module.

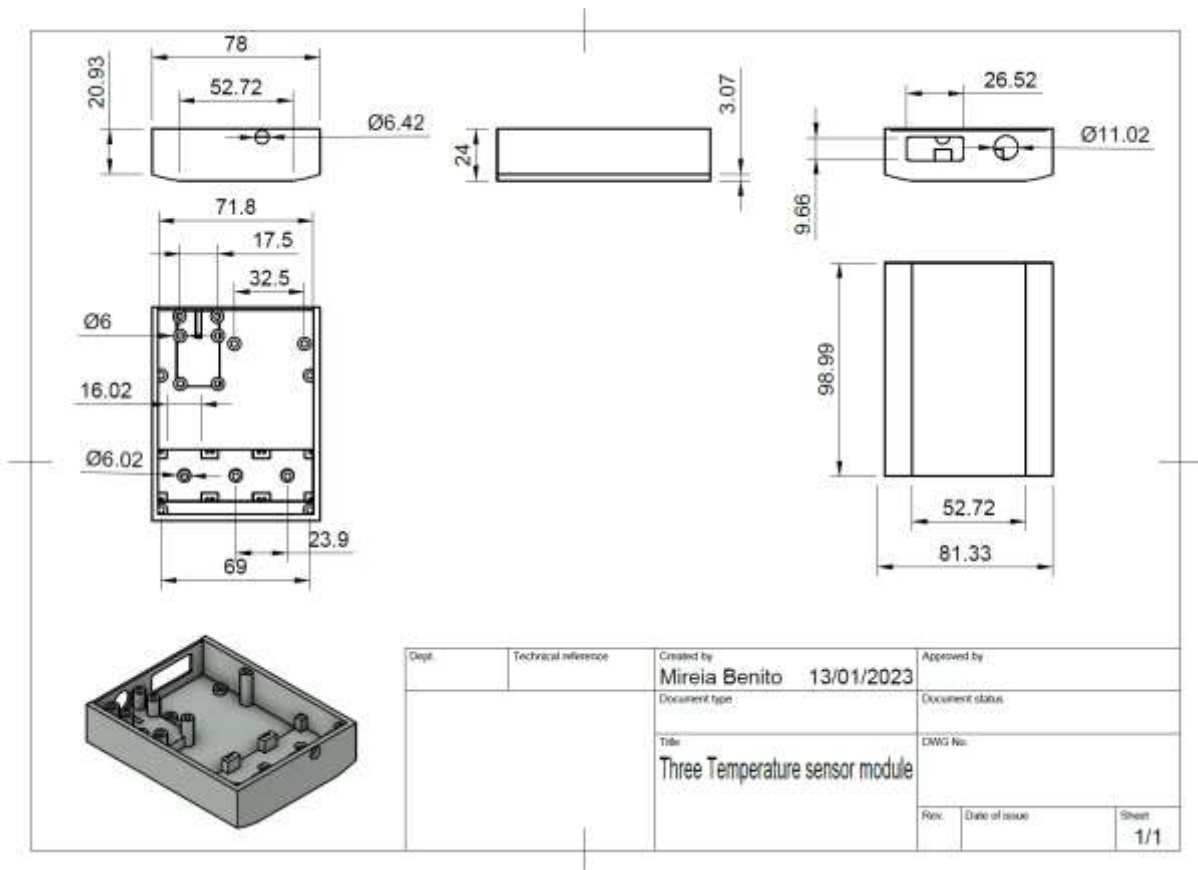

**Supplementary Figure 53:** Technical Drawing Showing the Dimensions of the 3 Temperature Sensor Module.

|                         |                |
|-------------------------|----------------|
| <b>Material</b>         | <b>PLA</b>     |
| <b>Time</b>             | 9 h 38 min     |
| <b>Quantity</b>         | 64 g – 8.05 m  |
| <b>Profile</b>          | Normal 0.15 mm |
| <b>Support required</b> | No             |

**Supplementary Table 14:** Ultimaker Cura Settings for 3D printing of the Three Temperature sensor module.

S.5.2.2 Lid for the Three Temperature Sensor Module

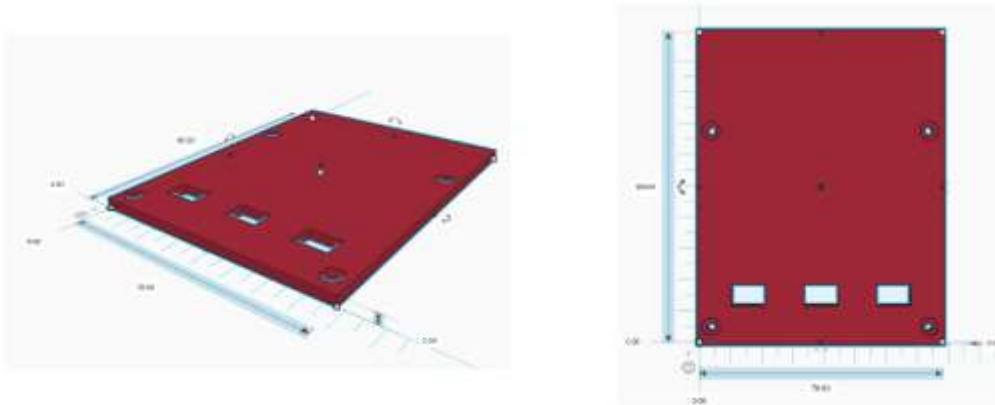

**Supplementary Figure 54:** Tinkercad design illustrating the planned lid for the Three Temperature Module sensor.

|                         |               |
|-------------------------|---------------|
| <b>Material</b>         | <b>PLA</b>    |
| <b>Time</b>             | 2 h 29 min    |
| <b>Quantity</b>         | 28 g – 3.48 m |
| <b>Profile</b>          | Fast 2 mm     |
| <b>Support required</b> | No            |

**Supplementary Table 15:** Ultimaker Cura Settings for 3D printing of the lid for the Three Temperature Sensor Module.

### S.5.3 Assembly of the 3D printed and electronic components of the 3 Temperature Sensor Module

The assembly of the three temperature sensor module can be followed through the same steps as described for the Phototemperature sensor.

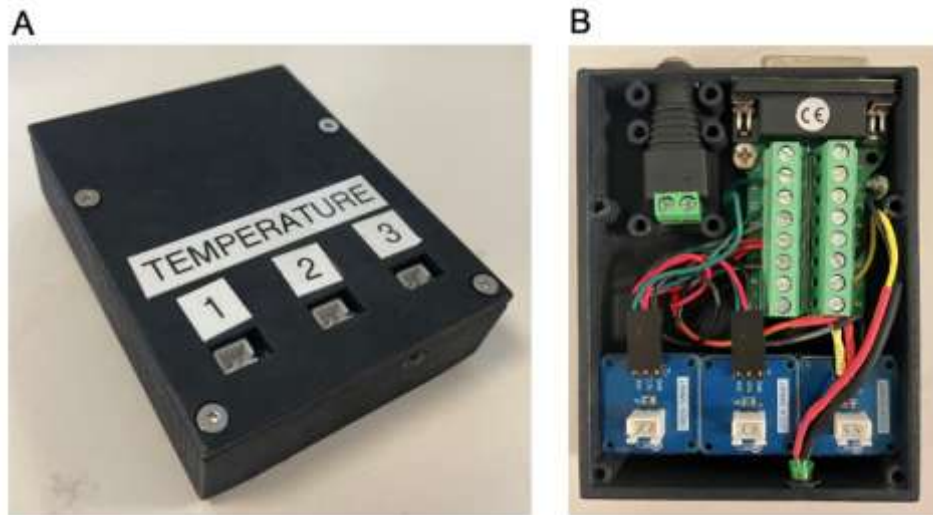

**Supplementary Figure 55:** 3D printed plug-in Three temperature module. A) Module assembled B) Electronics.

## S.5.4 Bill of Materials

| Component Number | Designator           | Component                                            | Number | Cost per unit – (GPB - £) | Total cost - | Source of materials |
|------------------|----------------------|------------------------------------------------------|--------|---------------------------|--------------|---------------------|
| 1                | 3D printed Structure | 3 temperature sensor module                          | 1      | £2.88                     | £2.88        | 3dgbire             |
| 2                | 3D printed Structure | 3 temperature sensor module lid                      | 1      | £1.38                     | £1.38        | 3dgbire             |
| 3                | Electronic           | Female 12v DC Power Jack Adapter Connector           | 1      | £0.43                     | £0.43        | Amazon              |
| 4                | Electronic           | 15 pin connector male                                | 1      | £5.51                     | £5.51        | Amazon              |
| 5                | Electronic           | Waterproof NTC Thermistor Temperature Adapter Module | 3      | £0.93                     | £2.79        | Amazon              |
| 6                | Electronic           | F-M Dupont Wires                                     | 9      | £0.05                     | £0.45        | Amazon              |
| 7                | Fastener             | M3*14                                                | 4      | £0.02                     | £0.08        | Ali express         |
| 8                | Fastener             | M3*5                                                 | 2      | £0.02                     | £0.04        | Ali express         |

|             |               |
|-------------|---------------|
| Total cost: | <b>£13.56</b> |
|-------------|---------------|

**Supplementary Table 16:** Bill of Materials for the 3 Temperature Sensor Module.

## S.6 Scale up version of Digital Continuous Flow System Design

### S.6.1 Design of Scale up version

The scale up system was mainly designed to enable the injection of higher reactant volumes for larger scale reactions. The base block was slightly modified to accommodate an Arduino Mega in the rear of the interior. As the Arduino mega has larger dimensions than the Arduino Uno Rev 2, the module slot in the front cavity was shifted to the side (**Sup. Fig. 56**). The base block lid used was the same as the previous block designed and the electronics (**Sup. Fig. 6-7**). The injection block was also modified from the previous versions as it required the incorporation of two valves at the back interior to automate the injection of solvent or reactant. The new version of the bottle holder contains three bottle holders, one for a 250 mL Duran bottle and two for 100 mL Duran bottles.

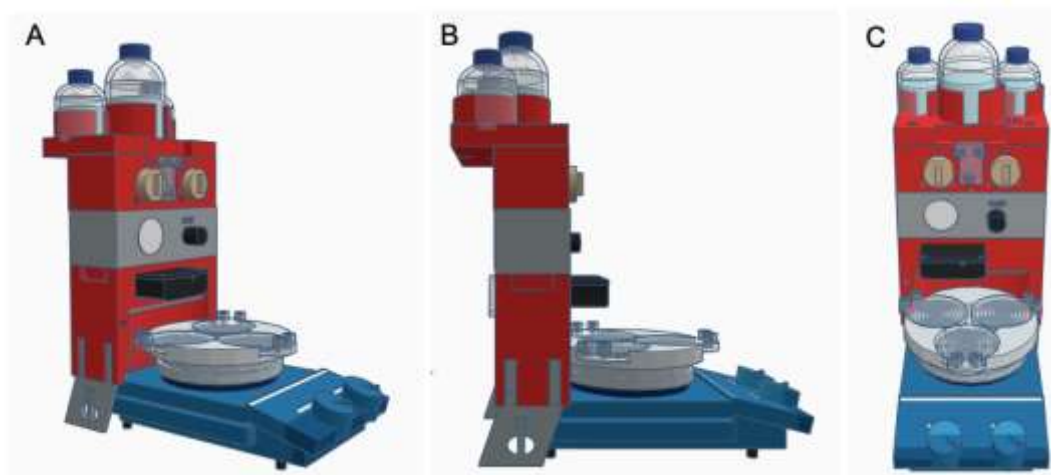

**Supplementary Figure 56:** Design and fitting of the Scale up system with the new versions of the Bottle holder and Base and injection block on the continuous flow system (Red blocks). A) Lateral view; B) Side view; C) Front view.

### S.6.2 Tinkercad design and assembly of the base block for the scale up version

Once the design of the components was complete in Tinkercad, they were exported individually as an STL (Standard Tessellation Language) file and uploaded to Cura software. The printing settings used to 3D print the following component are shown in the tables from section 7.1. Finally, the models were sliced and USB-connected to the printer.

S.6.2.1 Tinkercad design of scale up Digital Flow Base

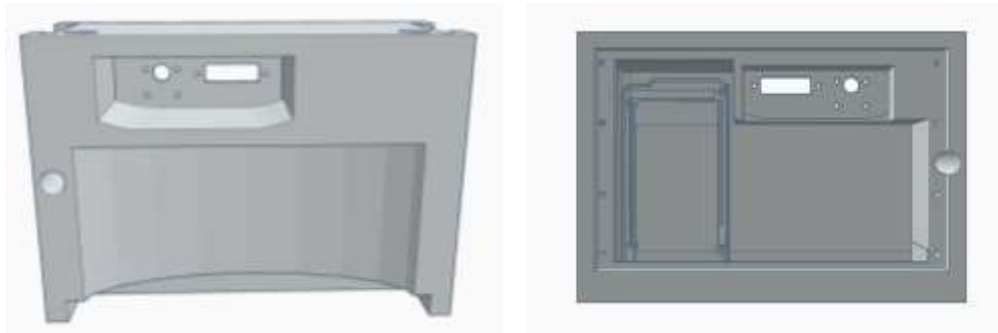

**Supplementary Figure 57:** Tinkercad design illustrating the Digital Base Flow.

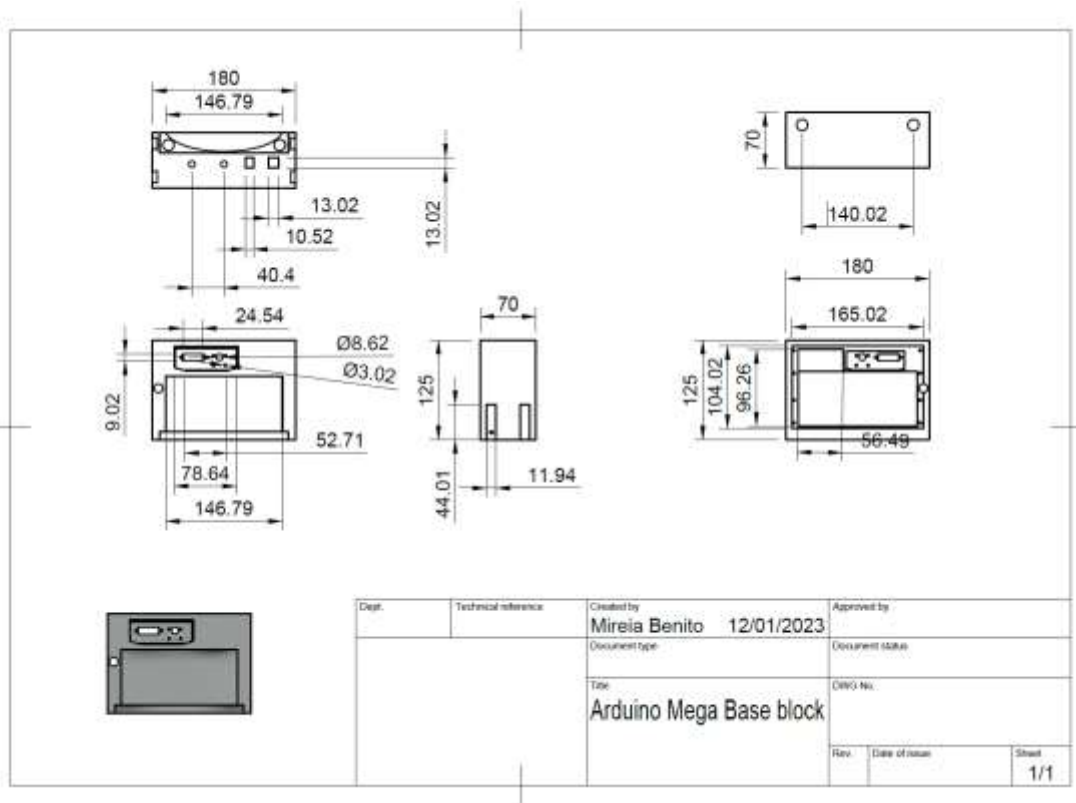

**Supplementary Figure 58:** Technical Drawing Showing the Dimensions of the Arduino Mega base block.

|                         |                   |
|-------------------------|-------------------|
| <b>Material</b>         | <b>PLA</b>        |
| <b>Time</b>             | 1 day 19 h 25 min |
| <b>Quantity</b>         | 444 g – 56.16 m   |
| <b>Profile</b>          | Normal 0.15 mm    |
| <b>Support required</b> | Yes               |

**Supplementary Table 17:** Ultimaker Cura Settings for 3D printing of the base block for the scale up version.

### S.6.2.2 Wiring connections of scale up Digital Flow Base

The assembly of the 3D printed components of the Scale up Digital Flow base and the electronics can be followed in the same manner as section S.2.3. The electronic components are built around an Arduino Mega board instead of an Arduino Uno (**Sup. Fig. 59**).

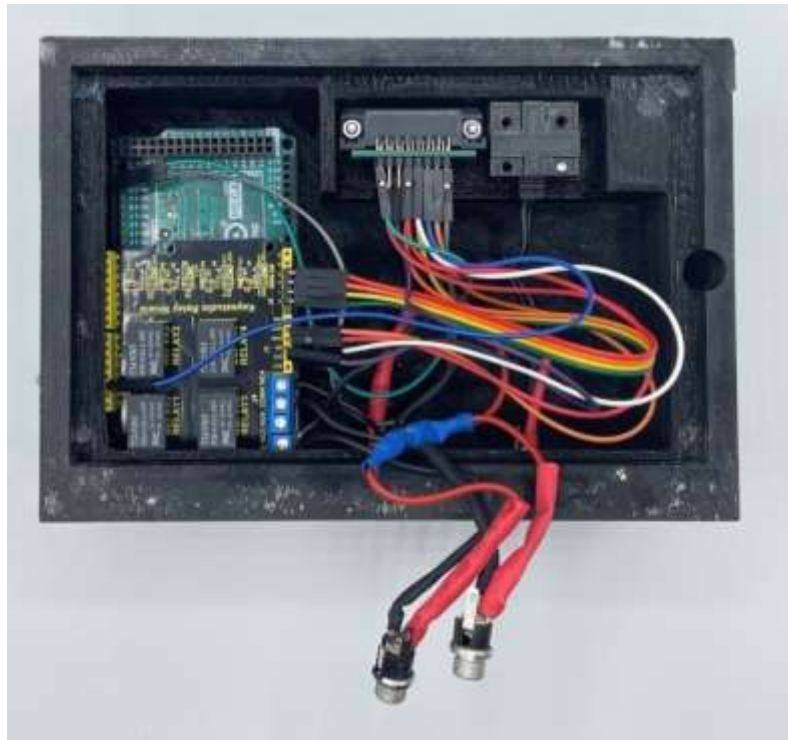

**Supplementary Figure 59:** Arduino Mega board wire connections.

The following table shows the wire connections from the Arduino Mega board to the DB15 connector and to the sensors of the three different modules (Flow and temperature sensors). Temperature sensors 1–3 correspond to the three temperature modules, while temperature sensor 4 corresponds to the Phototemperature module.

| Arduino pin | DB15 connector | Sensor pin | Type of sensor                    |
|-------------|----------------|------------|-----------------------------------|
| 21          | 1              | SCL        | Flow sensor                       |
| Not used    | 2              | Not used   | Not used                          |
| Not used    | 3              | Not used   | Not used                          |
| Analog 3    | 4              | SIG        | Temperature sensor 4              |
| 3V          | 5              | VDD        | Flow sensor                       |
| Digital 13  | 6              |            |                                   |
| GND         | 7              | GND        | Temperature sensor 4, flow sensor |
| 20          | 8              | SDA        | Flow sensor                       |
| Not used    | 9              | Not used   | Not used                          |
| GND         | 10             | GND        | Temperature sensor 1-2-3          |
| 5V          | 11             | UCC        | Temperature sensor 1-2-3-4        |
| Analog 2    | 12             | SIG        | Temperature sensor 3              |
| Analog 1    | 13             | SIG        | Temperature sensor 2              |
| Analog 0    | 14             | SIG        | Temperature sensor 1              |
| Not used    | 15             | Not used   | Not used                          |

**Supplementary Table 18:** Wire connections of Relay shield and Arduino Mega Board.

### S.6.3. Tinkercad design and assembly of the 3D printed and electronic components scale up Injection block

The design of the Scale up injection block was designed to fit in the two 2 mL loops and two L-type valves to automate the injection of solvent or reactant. Once the design of the components was completed in Tinkercad, they were exported individually as an STL (Standard Tessellation Language) file and uploaded to Cura software. The printing settings used to 3D print the following component are shown in the tables from section 7.1. Finally, the models were sliced and USB-connected to the printer. After the components were 3D printed, the electronics and wires were assembled.



S.6.3.1 Tinkercad design of scale up Digital Injection Block

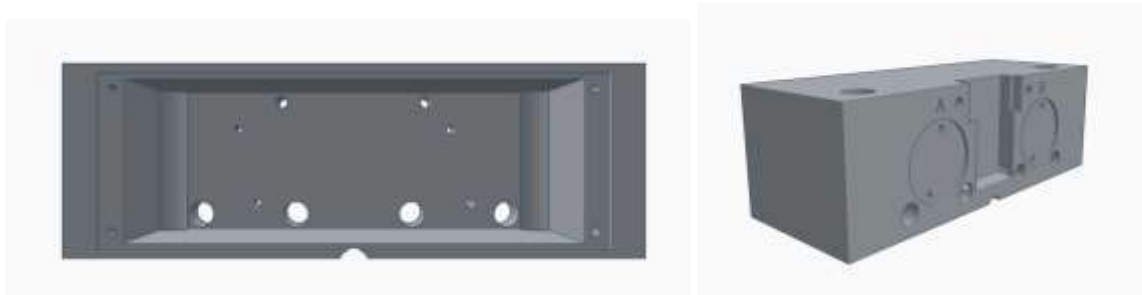

**Supplementary Figure 60:** Tinkercad design illustrating the scale up Injection block version.

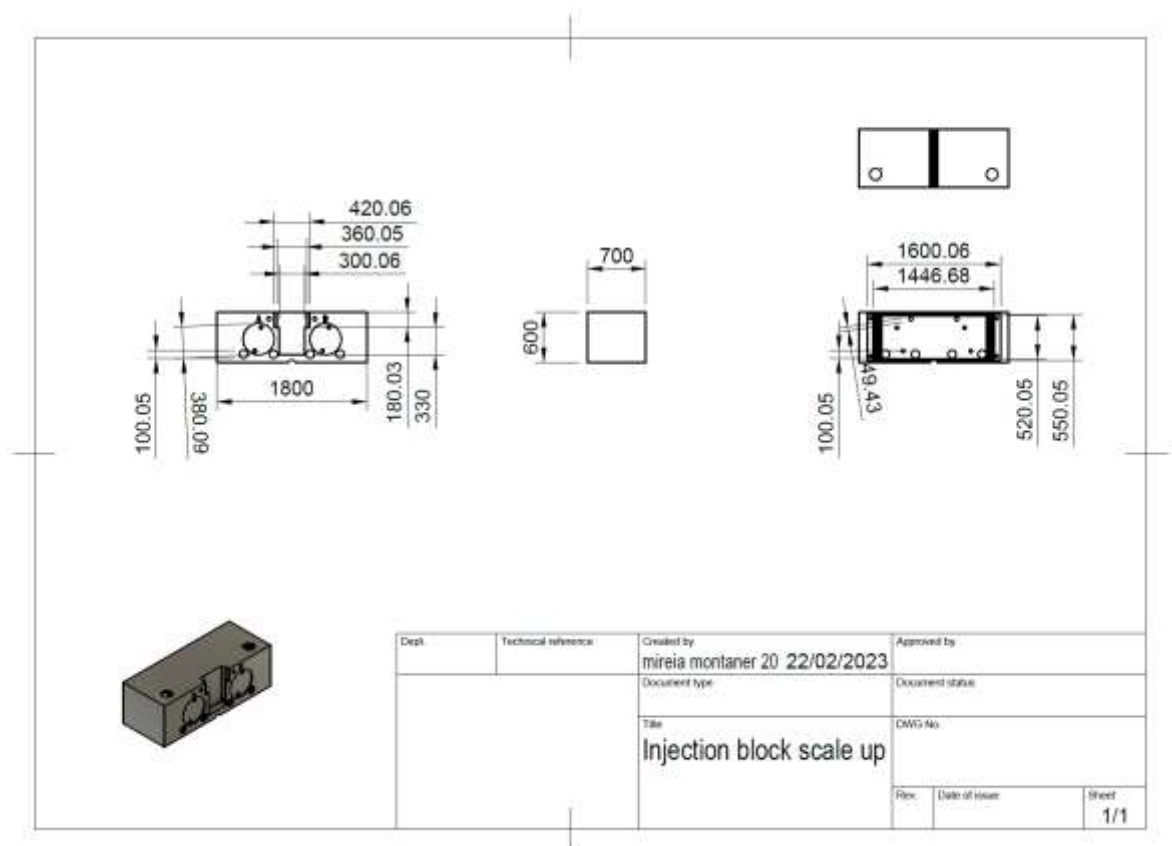

**Supplementary Figure 61:** Technical Drawing Showing the Dimensions of the Injection block.

|                         |                 |
|-------------------------|-----------------|
| <b>Material</b>         | <b>PLA</b>      |
| <b>Time</b>             | 18 h 35 min     |
| <b>Quantity</b>         | 166 g – 21.10 m |
| <b>Profile</b>          | Normal 0.15 mm  |
| <b>Support required</b> | No              |

**Supplementary Table 19:** Ultimaker Cura Settings for 3D printing the injection block for the scale up version.

S.6.3.2 Tinkercad design of scale up Digital Injection Block

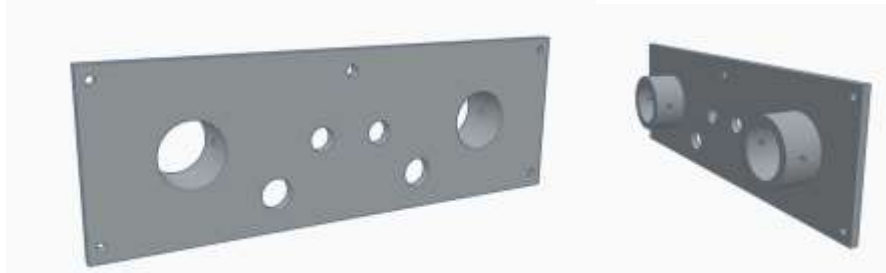

**Supplementary Figure 62:** Tinkercad design illustrating the scale up Injection block lid.

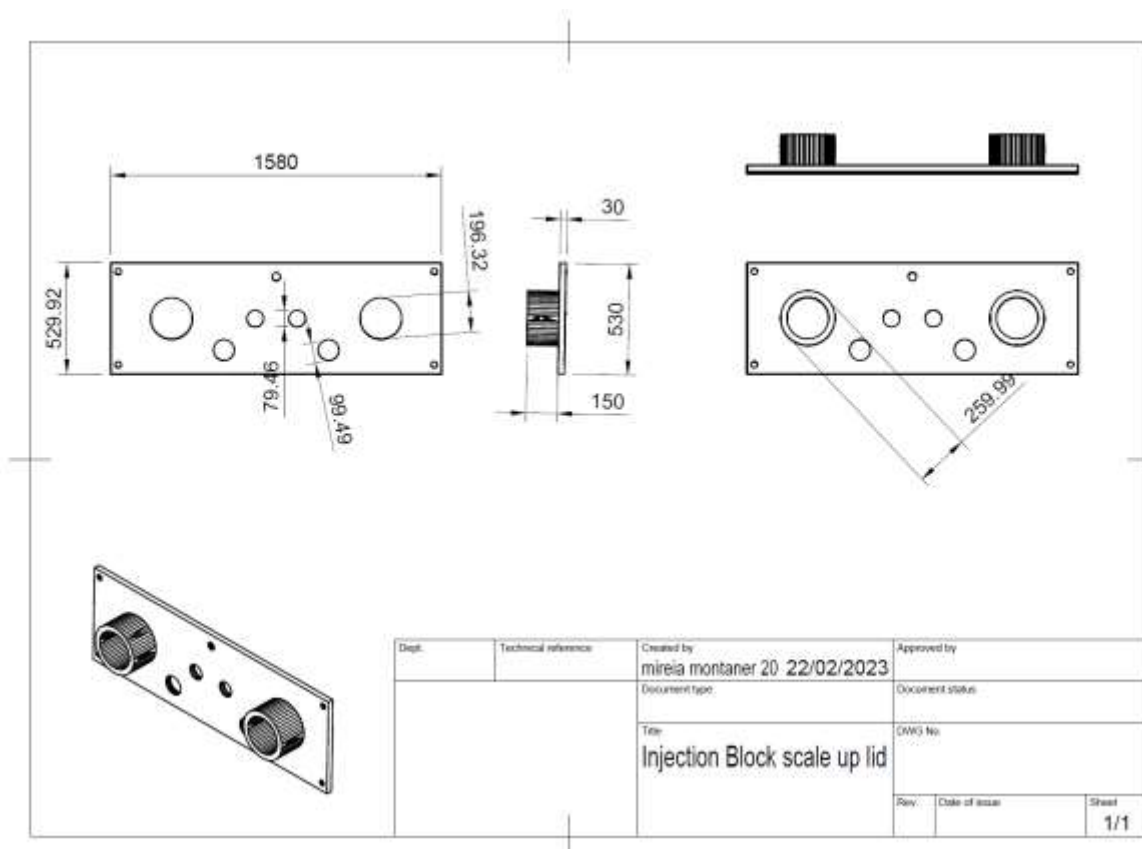

**Supplementary Figure 63:** Technical Drawing Showing the Dimensions of the Injection block lid.

|                         |                |
|-------------------------|----------------|
| <b>Material</b>         | <b>PLA</b>     |
| <b>Time</b>             | 4 h 14 min     |
| <b>Quantity</b>         | 30 g – 3.77 m  |
| <b>Profile</b>          | Normal 0.15 mm |
| <b>Support required</b> | No             |

**Supplementary Table 20:** Ultimaker Cura Settings for 3D printing the lid of injection block for the scale up version.

The following diagram illustrates the 6 ports from the valves which consist of: sample, waste flow in and flow out and (3). The valve features six ports arranged evenly around its circumference. Each port is linked to either the adjacent clockwise or anticlockwise port. By manipulating the valve, the neighboring port connection can be altered. In the left image, the sample is being charged into the loop, while in the right image, it can be redirected into the flow.

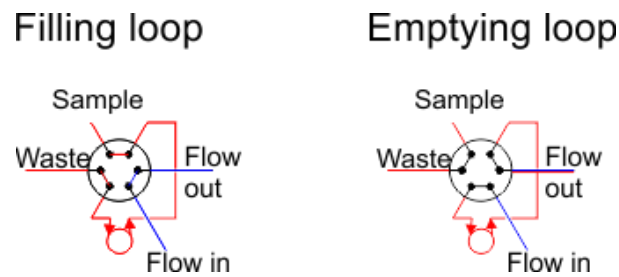

**Supplementary Figure 64:** 6 way loop valve.

### S.6.3.3 Assembly of the 3D printed and electronic components to the scale up Digital Injection Block

To assemble the injection block for the scale up version, the 3D printed components must first be printed and ready for assembly (**Sup. Fig. 65**).

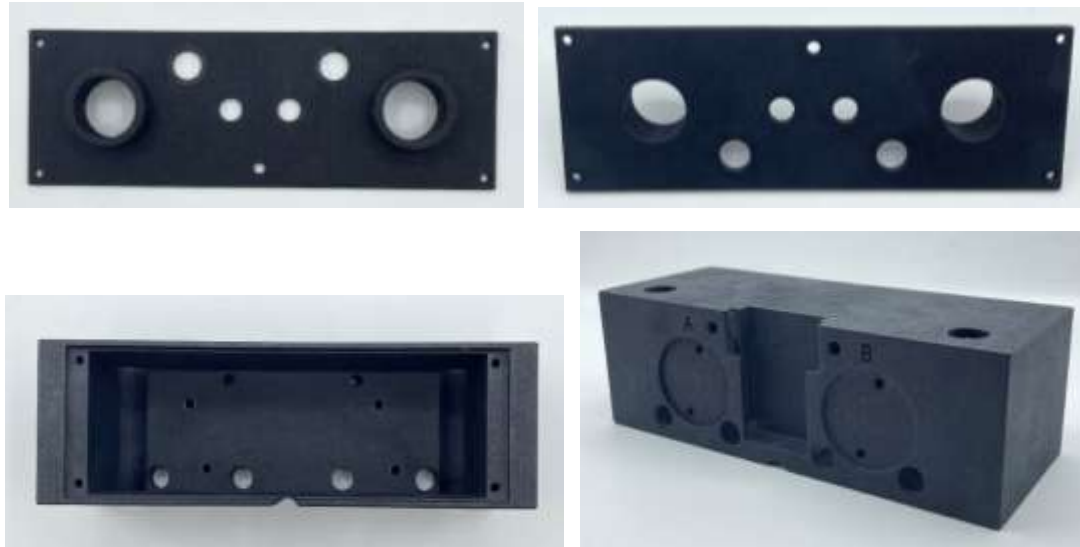

**Supplementary Figure 65:** 3D printed components of the Scale up injection block.

The Figure below illustrates the components required to set up the module (**Sup. Fig. 66**).

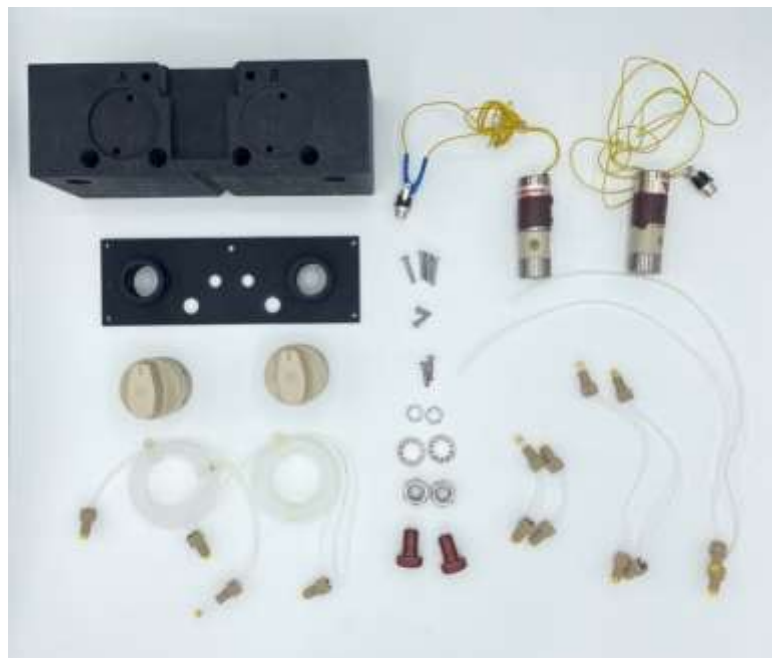

**Supplementary Figure 66:** Components of the Injection block.

**Step 1:** installation of the union body, lock washer and nut to the injection block lid

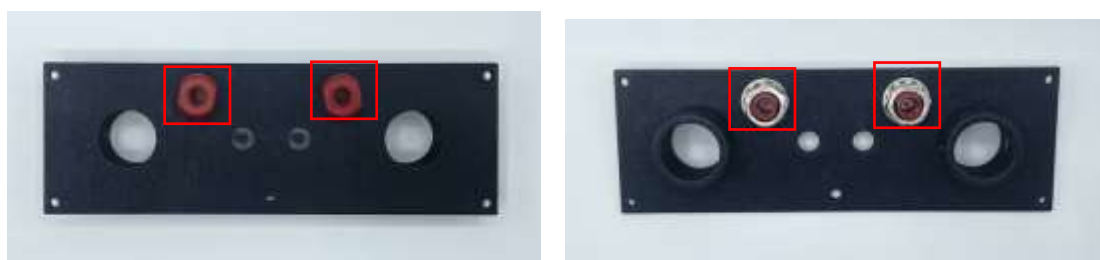

**Supplementary Figure 67:** installation of union body, lock washer and nut to the injection block lid.

**Step 2:** connect the two L-type valve to the injection block lid

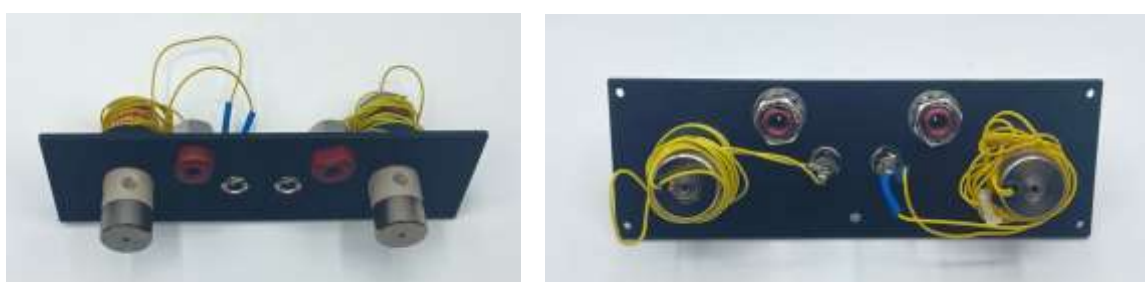

**Supplementary Figure 68:** installation of two L-type valves.

**Step 3:** secure the two 6-port loop injection valves to the injection block with two 934 M3 screws for each valve.

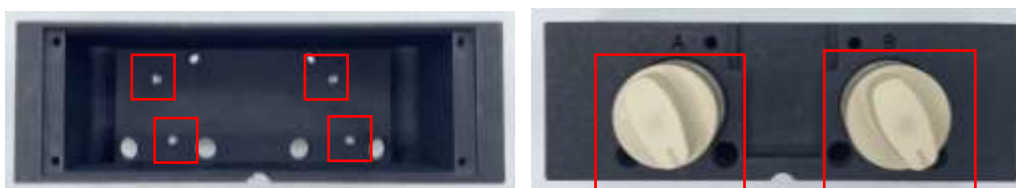

**Supplementary Figure 69:** installation of two 6-port loop injection valves.

**Step 4:** connect two small tubes, one for each valve, from the middle port to the union body

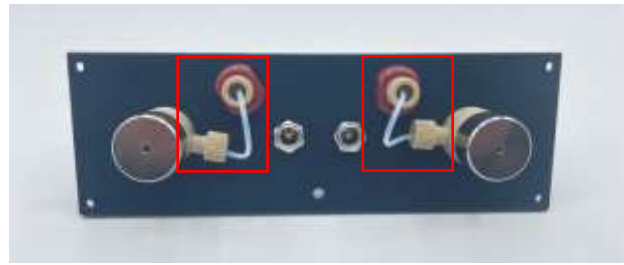

**Supplementary Figure 70:** installation of tubing from the L-type valve to the union body.

**Step 5:** a tubing is connected to the waste port of the valve.

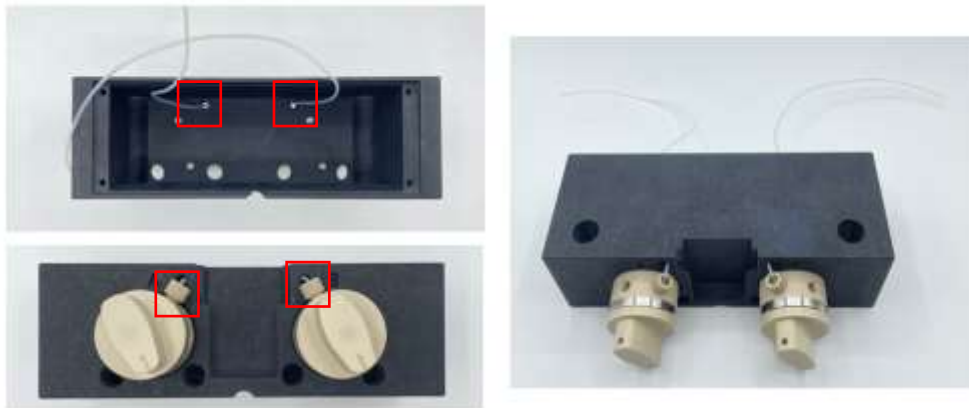

**Supplementary Figure 71:** installation of the waste tube.

**Step 6:** the two 2mL tubing loops are connected to the 6 way look valve.

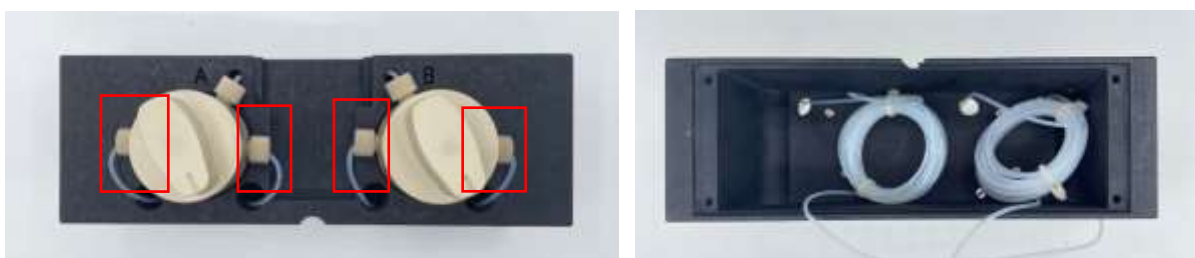

**Supplementary Figure 72:** installation of two 2mL loop tubing.

**Step 7:** connection of the sample tubing from the 6 port valve in the injection block to the lid

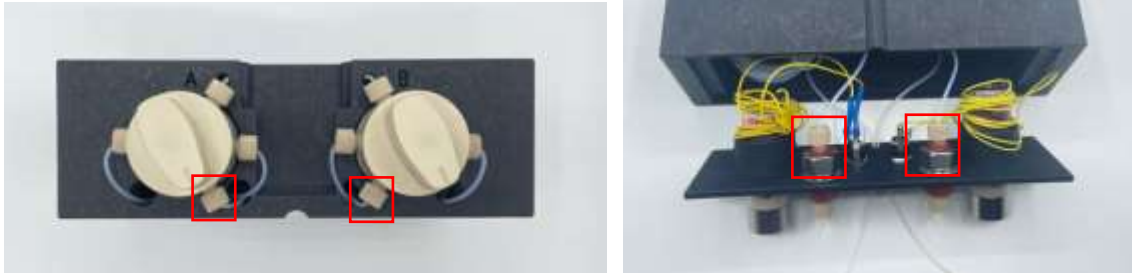

**Supplementary Figure 73:** installation of the Relay shield.

**Step 8:** secure the lid with two M3\*8 and two M3\*10 screws

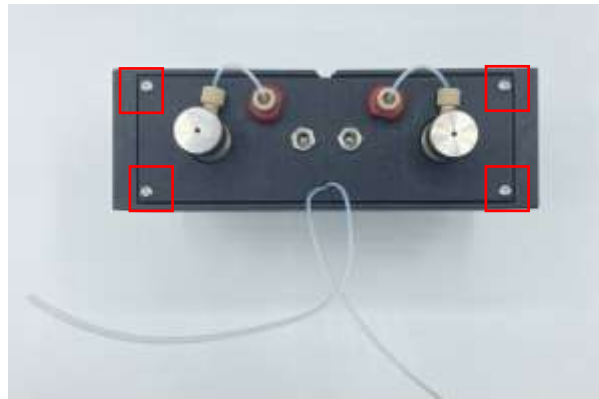

**Supplementary Figure 74:** lid secured to the injection block.

#### **S.6.4 Design of the 3D printed scale up bottle holder**

Once the design of the components was completed in Tinkercad, they were exported individually as an STL (Standard Tessellation Language) file and uploaded to Cura software. The printing settings used to 3D print the following component are shown in section 7.1. Finally, the models were sliced and USB-connected to the printer.

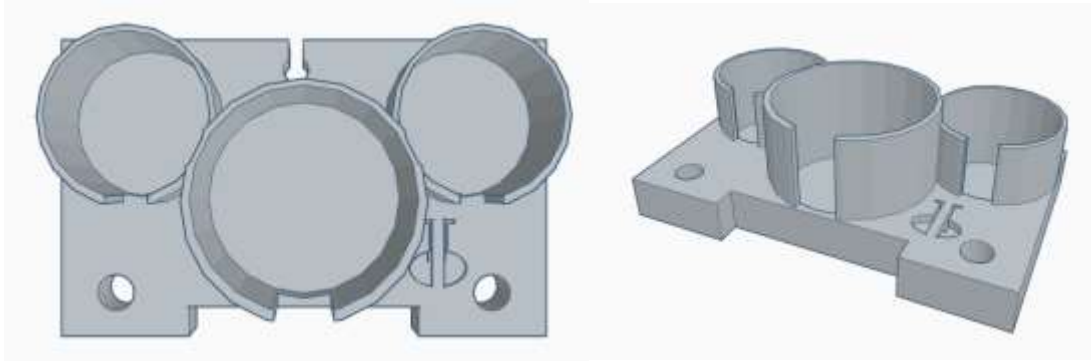

**Supplementary Figure 75:** Tinkercad design illustrating the scale up bottle holder.

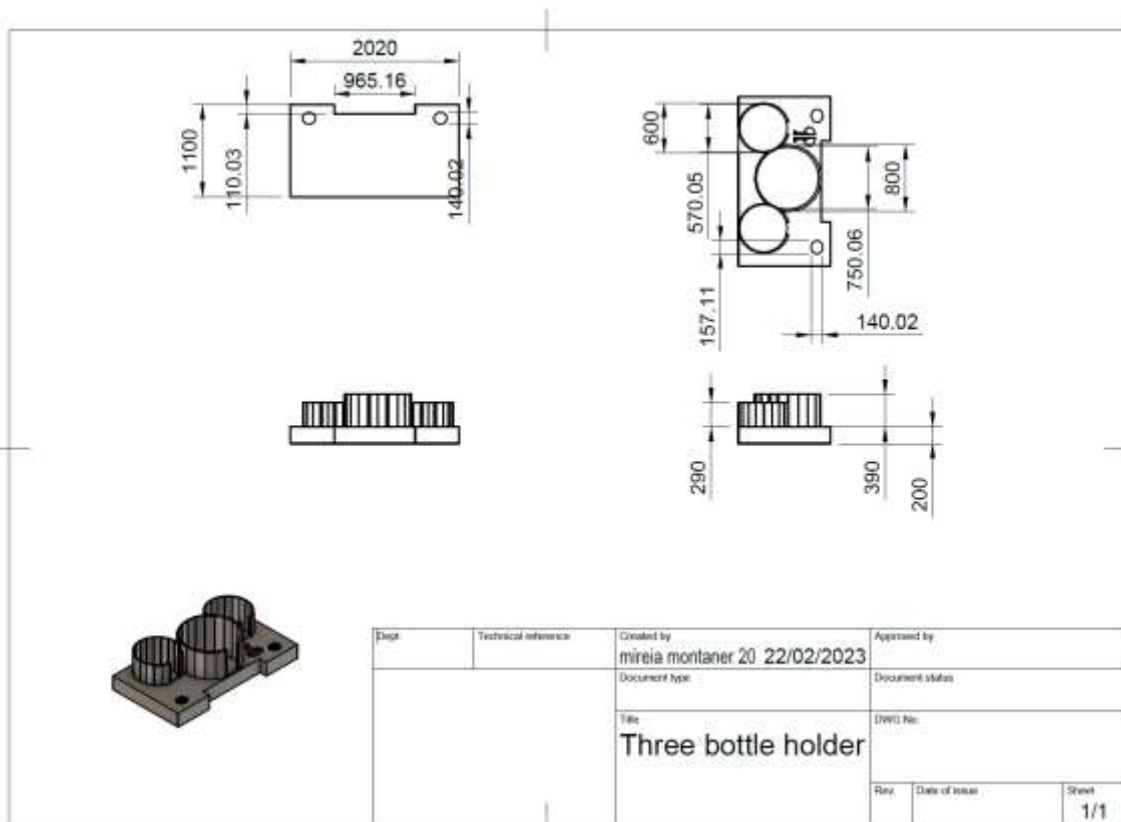

**Supplementary Figure 76:** Technical Drawing Showing the Dimensions of the bottle holder for the scale up system.



|                         |                 |
|-------------------------|-----------------|
| <b>Material</b>         | <b>PLA</b>      |
| <b>Time</b>             | 20 h 35 min     |
| <b>Quantity</b>         | 174 g – 21.92 m |
| <b>Profile</b>          | Normal 0.15 mm  |
| <b>Support required</b> | No              |

**Supplementary Table 21:** Ultimaker Cura Settings for 3D the bottle holder for the scale up version.

The Duran pressure bottles are connected to two three-way L-type solenoid valves powered by a 24V power supply. The two valves are located in the back end of the injection block and regulates which fluid flows into the mixing chip. The L-type valve has two 90 degrees positions that connect one side port and the centre (**Sup. Fig. 77**). The valves opening and closing are controlled by the MegunoLink platform interface. When the valve is closed, solvent flows, and when it is open, reactant flows.

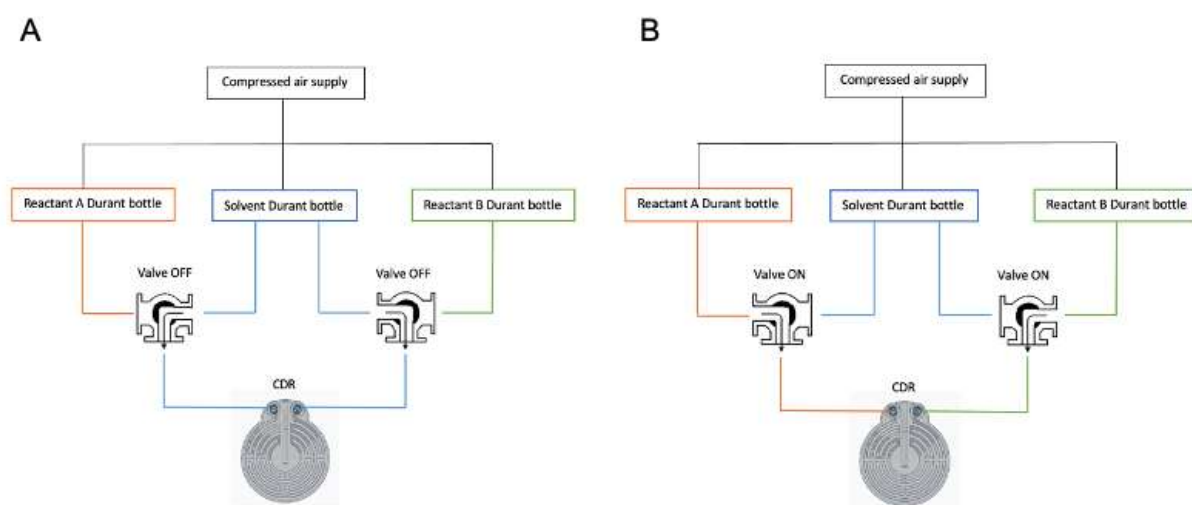

**Supplementary Figure 77:** Three-way valves operation A) Valve closed. B) Valve opened.

### S.6.5 Assembly of Scale up flow system

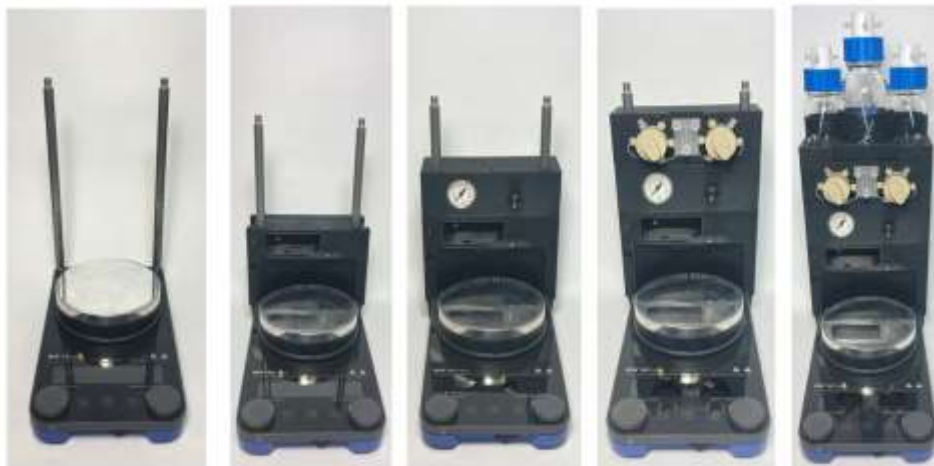

**Supplementary Figure 78:** Assembly step by step of the different blocks.

### S.6.6 Bill of Materials

| Component Number | Designator           | Component                        | Units | Cost per unit – (GPB - £) | Total cost - | Source of materials |
|------------------|----------------------|----------------------------------|-------|---------------------------|--------------|---------------------|
| 1                | 3D printed structure | Base block                       | 1     | £24.00                    | £24.00       | 3dgbire             |
| 2                | 3D printed structure | Base block lid                   | 1     | £2.95                     | £2.95        | 3dgbire             |
| 3                | 3D printed structure | Base block supports              | 2     | £1.8                      | £3.6         | 3dgbire             |
| 4                | 3D printed structure | Injection block                  | 1     | £8.97                     | £8.97        | 3dgbire             |
| 5                | 3D printed structure | Injection block lid              | 1     | £1.62                     | £1.62        | 3dgbire             |
| 6                | 3D printed structure | Bottle holder                    | 1     | £9.40                     | £9.40        | 3dgbire             |
| 7                | Electronics          | Keystudio 4 channel Relay shield | 1     | £19.19                    | £19.19       | Amazon              |
| 8                | Electronics          | Arduino Mega                     | 1     | £48.37                    | £48.37       | Amazon              |

|    |            |                                            |   |         |         |             |
|----|------------|--------------------------------------------|---|---------|---------|-------------|
| 9  | Electronic | Male 12v DC Power Jack Adapter Connector   | 1 | £0.43   | £0.43   | Amazon      |
| 10 | Electronic | DB 15 pin connector female                 | 1 | £8.99   | £8.99   | Amazon      |
| 11 | Electronic | F-M Dupont Wires                           | 7 | £0.05   | £0.35   | Amazon      |
| 12 | Electronic | F-F Dupont wire                            | 4 | £0.05   | £0.2    | Amazon      |
| 13 | Electronic | L-type valve                               | 2 | £219.88 | £439.76 | Kinesis     |
| 14 | Electronic | Diba Omnifit® Loop Injection Valve, 6-port | 2 | £288.86 | £577.72 | Cole Palmer |
| 15 | Fastener   | M3*4                                       | 1 | £0.02   | £0.02   | Ali express |
| 16 | Fastener   | M3*8                                       | 6 | £0.02   | £0.06   | Ali express |
| 17 | Fastener   | M3*10                                      | 4 | £0.02   | £0.08   | Ali express |
| 18 | Fastener   | 934 M3                                     | 4 | £0.02   | £0.08   | Ali express |
| 19 | Fastener   | Union body                                 | 2 | £20.78  | £41.56  | Cole-Palmer |
| 20 | Fastener   | Lock washer                                |   |         |         |             |
| 21 | Fastener   | Nut                                        |   |         |         |             |

|             |                 |
|-------------|-----------------|
| Total cost: | <b>£1187.35</b> |
|-------------|-----------------|

**Supplementary Table 22:** Bill of Materials for the 3 Temperature Sensor Module.

### S.6.7 Meguno Link Interface Platform

The interface platform that we used to communicate between the Arduino microcontroller and the PC is MegunoLink. This platform can read the data from the sensors and display it in a human readable way. The platform software that we designed contains 3 tabs:

- Connection Manager (**Sup. Fig. 79**): the platform connects to the Arduino through this tab.
- Monitor (**Sup. Fig. 80**)
- Interface panel:
  - Welcome/Splash screen (**Sup. Fig. 81A**)

- System configuration (**Sup. Fig. 81B**): determines how the flow system is set up, the solvent used, amount and type of reactors and the collection variables.
- System control (**Sup. Fig. 81C**): determines the reaction variables. These influence the overall duration of the reaction and set how long the valves must be open to allow reactants to flow into the reaction path.
- Reaction monitoring (**Sup. Fig. 81D**): when the Three Temperature module is connected, the measurements from the sensor will be displayed in this tab.
- Flow monitoring (**Sup. Fig. 81E**): when the Flow rate module is connected, the measurements from the sensor will be displayed in this tab.
- Photoflow monitoring (**Sup. Fig. 81F**): when the PhotoTemperature module is connected, the measurements from the sensor will be displayed in this tab.

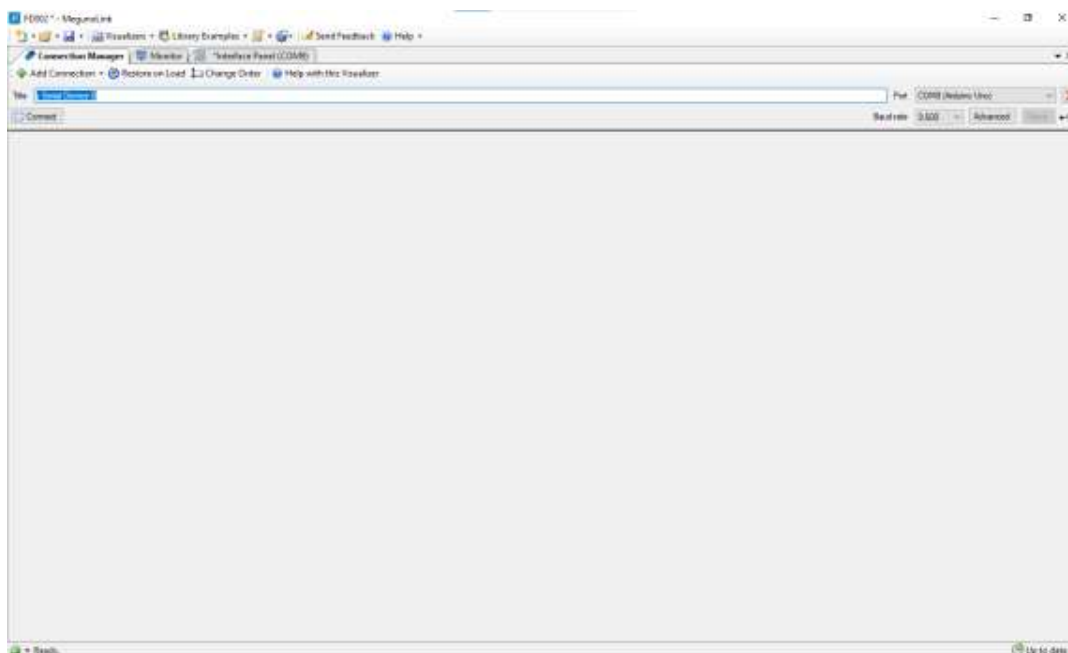

**Supplementary Figure 79:** Connection manager tab.

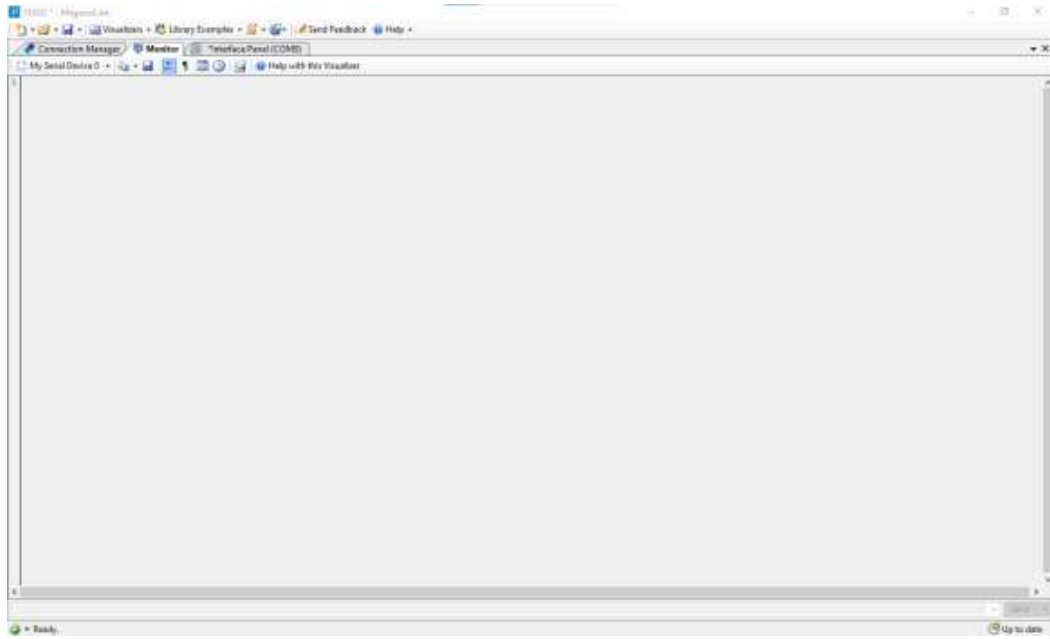

**Supplementary Figure 80: Monitor tab.**

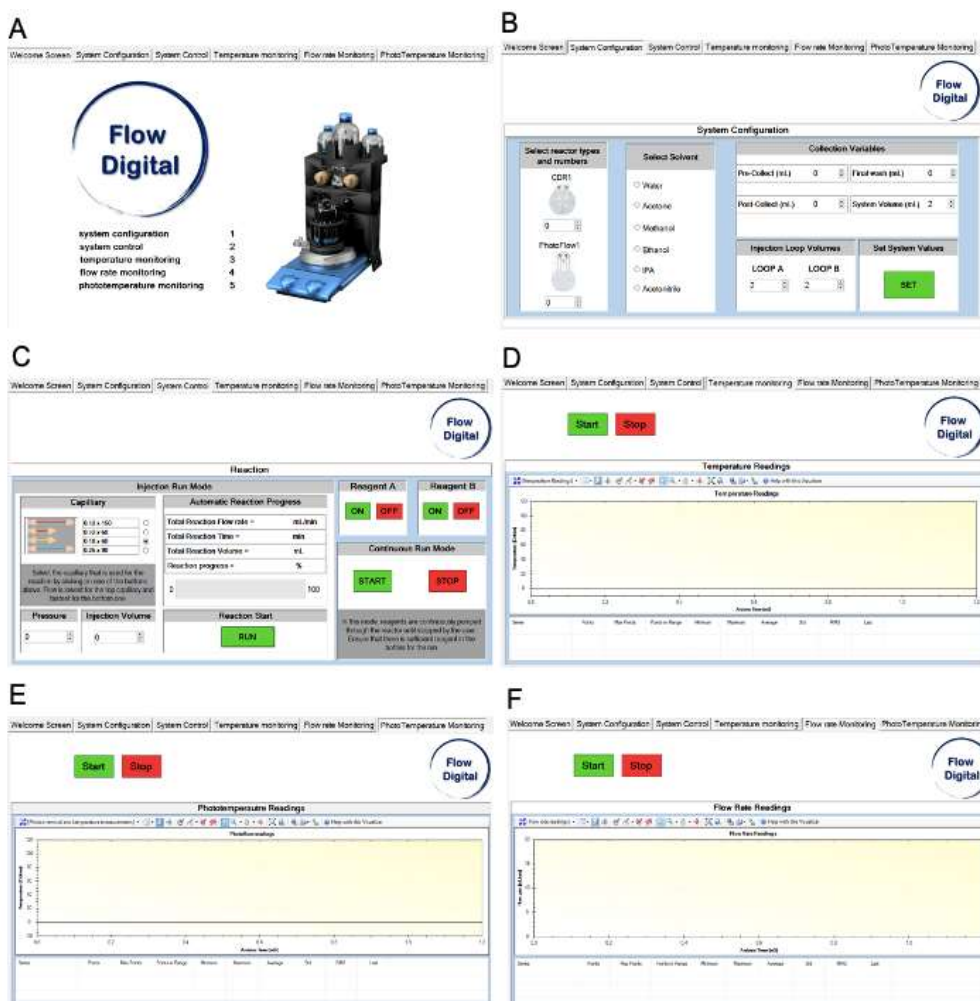

**Supplementary Figure 81:** MegunoLink Interface of the project. A) Welcome screen tab. B) System configuration tab. C) System control tab. D) Temperature monitoring tab. E) Phototemperature monitoring tab. F) Flow rate monitoring tab.

The following equation was used to determine the amount of time the valve must be open for the reactant to flow into path in order to automate the scale up injection system.

$$\text{Flow rate} \left( \frac{\text{volume in ml}}{\text{time in min}} \right) = a \times \text{Pressure (PSI)} + b \rightarrow \text{Time (min)} = \frac{\text{Volume (mL)}}{a \times \text{Pressure (PSI)} + b}$$

**Equation 1:** Flow rate and pressure linear equation where a and b are constant numbers.

All solvent's flow rate and pressure correlations were measured, resulting in different equations for each solvent (Graph 3-8). Each solvent was allocated a number ranging from 1 to 6, thus when a solvent is selected on the interface, the data sent to the Arduino corresponds to that number. This approach simplified the code and facilitated the communication between the MegunoLink platform and the Arduino board. To calculate the overall time of the reaction (*TotalTime*), the volume corresponds to the *TotalVolume + InjectionVolume*. The *TotalVolume*

is equal to the volume values of the CRD used, precollect, postcollect and system volumes inserted on the Configuration tab. The *InjectionVolume* value is entered on the Control tab and represents the amount of reactant to be injected into the flow path. Since the time value is calculated in minutes, and the code employs the time function in `millis()`, the time value must be multiplied by 60000 to convert minutes to milliseconds.

```

if (Solvent==1){
TotalTime=((TotalVolume-InjectionVolume)/((0.018*Pressure)+0.0215))*60000);
TotalMillis=(StartMillis+TotalTime);
EFlowrate=((0.0168*Pressure)+0.02);
if (millis() - StartMillis >= ((InjectionVolume/((0.018*Pressure)+0.0215))*60000)) {
digitalWrite(SolenoidAPIN,LOW);
digitalWrite(SolenoidBPIN,LOW);
ReactionRUN = false;
}
}

```

However, when calculating the time for the valve to remain open, the volume corresponds only to the *InjectionVolume*. When this period of time has passed, the valve closes.

```

if (Solvent==1){
TotalTime=((TotalVolume-InjectionVolume)/((0.018*Pressure)+0.0215))*60000);
TotalMillis=(StartMillis+TotalTime);
EFlowrate=((0.0168*Pressure)+0.02);
if (millis() - StartMillis >= ((InjectionVolume/((0.018*Pressure)+0.0215))*60000)) {
digitalWrite(SolenoidAPIN,LOW);
digitalWrite(SolenoidBPIN,LOW);
ReactionRUN = false;
}
}

```

This part of the code corresponding to the reaction time control was constructed with *if* and *else if* statements. The first *if* statement is regarding the capillary used and inside each capillary statement, there is a second *if* statement. The second statement refers to the solvent used which will determine the *TotalTime* calculation. As previously stated, each solvent was assigned a number between 1 and 6, so when a solvent is selected in the System Control tab, the assigned number is sent to the Arduino code.

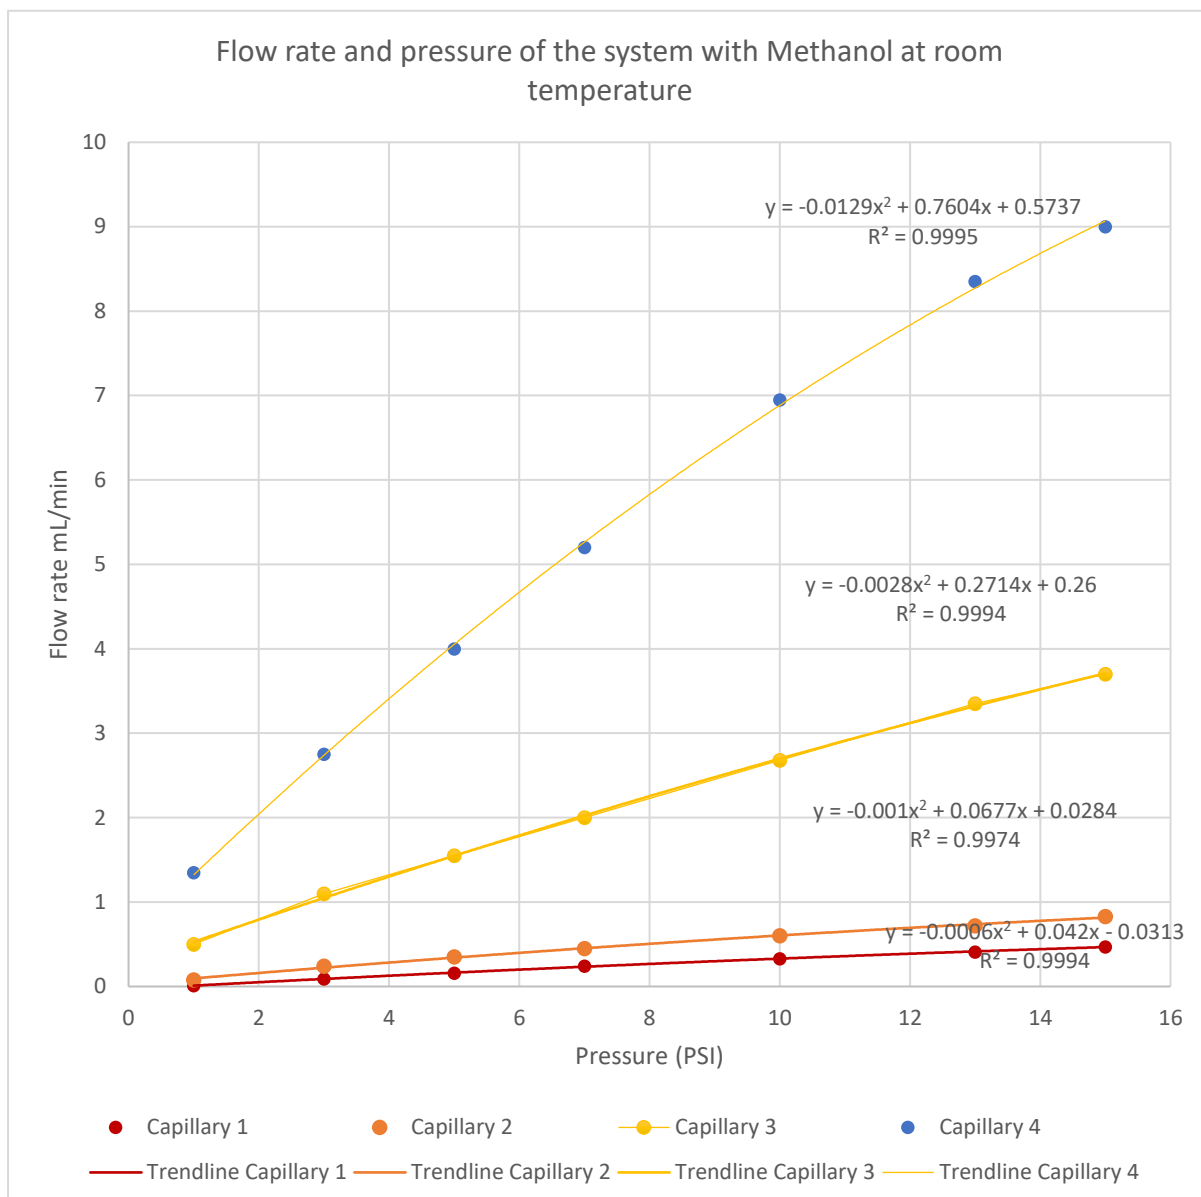

**Supplementary Graph 1:** Selected capillaries to measure the flow rate of Methanol at specific pressures.

| Pressure | Capillary 1 | Capillary 2 | Capillary 3 | Capillary 4 |
|----------|-------------|-------------|-------------|-------------|
| 1        | 0.01        | 0.08        | 0.5         | 1.35        |
| 3        | 0.09        | 0.24        | 1.1         | 2.75        |
| 5        | 0.16        | 0.35        | 1.55        | 4           |
| 7        | 0.24        | 0.45        | 2           | 5.2         |
| 10       | 0.33        | 0.6         | 2.68        | 6.95        |
| 13       | 0.41        | 0.72        | 3.35        | 8.35        |
| 15       | 0.47        | 0.83        | 3.7         | 9           |

**Supplementary Table 23:** Flow rate of Methanol at different pressures and capillaries.



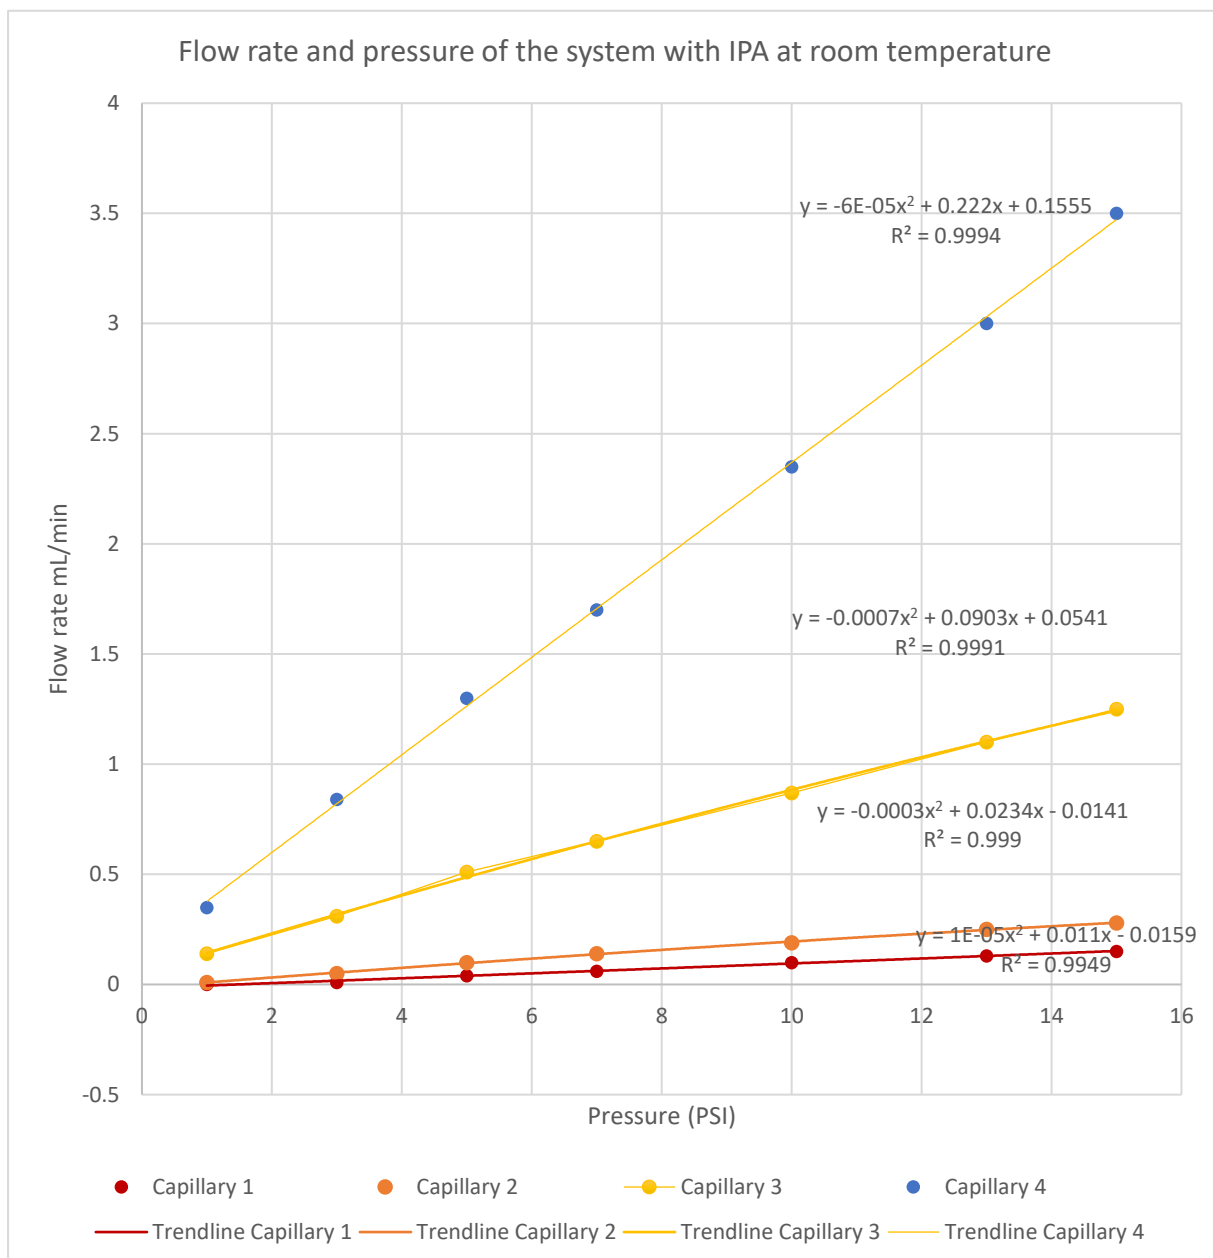

**Supplementary Graph 2:** Selected capillaries to measure the flow rate of IPA at specific pressures.

| Pressure | Capillary 1 | Capillary 2 | Capillary 3 | Capillary 4 |
|----------|-------------|-------------|-------------|-------------|
| 1        | 0           | 0.01        | 0.14        | 0.35        |
| 3        | 0.01        | 0.05        | 0.31        | 0.84        |
| 5        | 0.04        | 0.1         | 0.51        | 1.3         |
| 7        | 0.06        | 0.14        | 0.65        | 1.7         |
| 10       | 0.1         | 0.19        | 0.87        | 2.35        |
| 13       | 0.13        | 0.25        | 1.1         | 3           |
| 15       | 0.15        | 0.28        | 1.25        | 3.5         |

**Supplementary Table 24:** Flow rate of IPA at different pressures and capillaries.

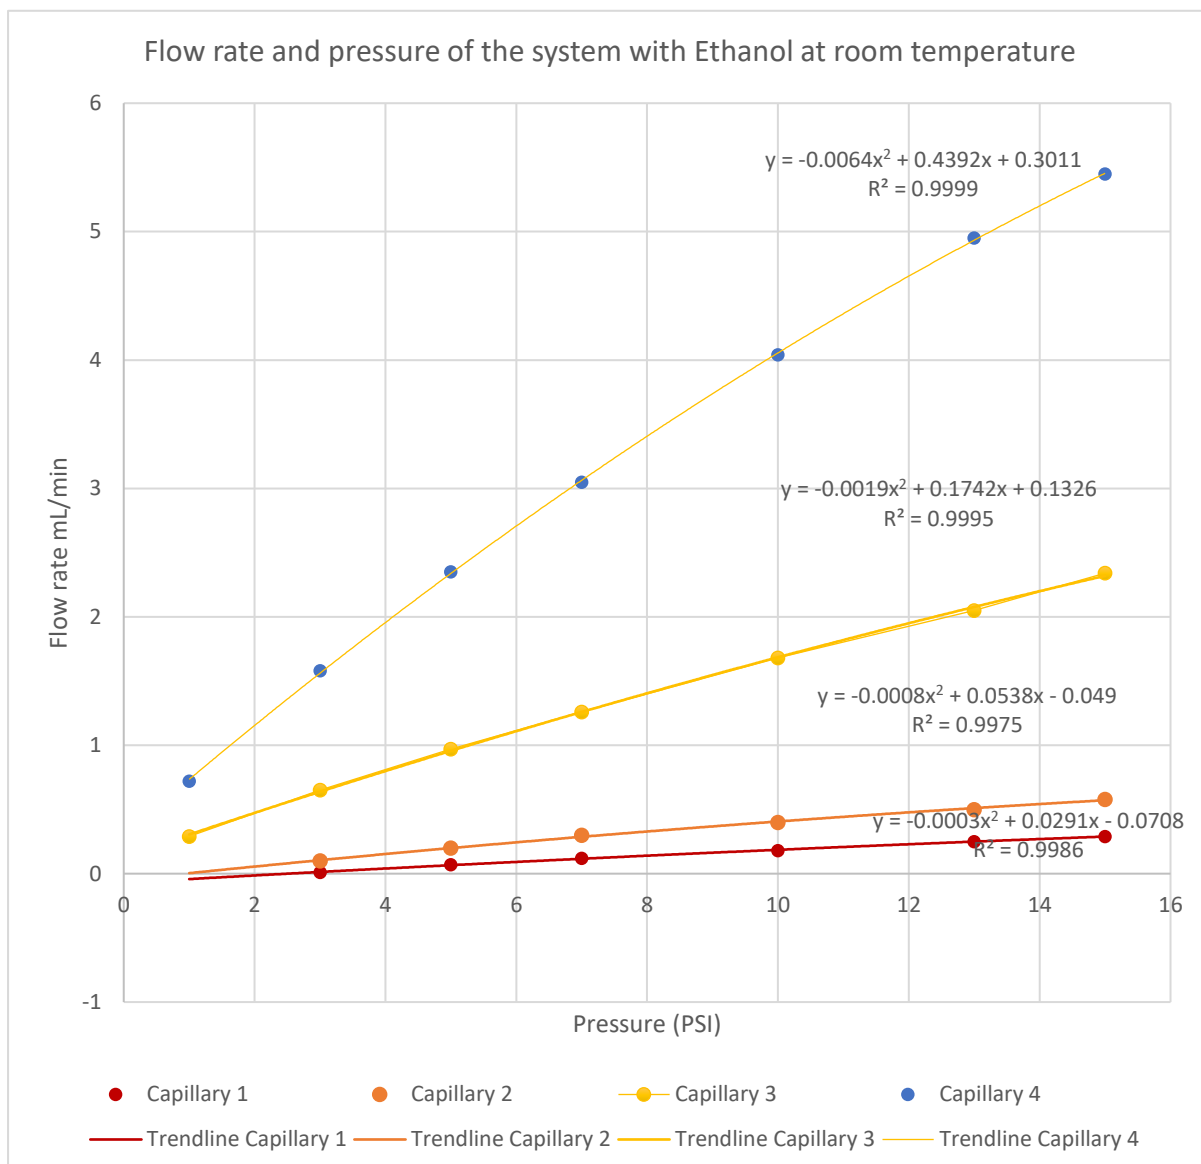

**Supplementary Graph 3:** Selected capillaries to measure the flow rate of Ethanol at specific pressures.

| Pressure | Capillary 1 | Capillary 2 | Capillary 3 | Capillary 4 |
|----------|-------------|-------------|-------------|-------------|
| 1        |             |             | 0.29        | 0.72        |
| 3        | 0.01        | 0.1         | 0.65        | 1.58        |
| 5        | 0.07        | 0.2         | 0.97        | 2.35        |
| 7        | 0.12        | 0.3         | 1.26        | 3.05        |
| 10       | 0.18        | 0.4         | 1.68        | 4.04        |
| 13       | 0.25        | 0.5         | 2.05        | 4.95        |
| 15       | 0.29        | 0.58        | 2.34        | 5.45        |

**Supplementary Table 25:** Flow rate of Ethanol at different pressures and capillaries.

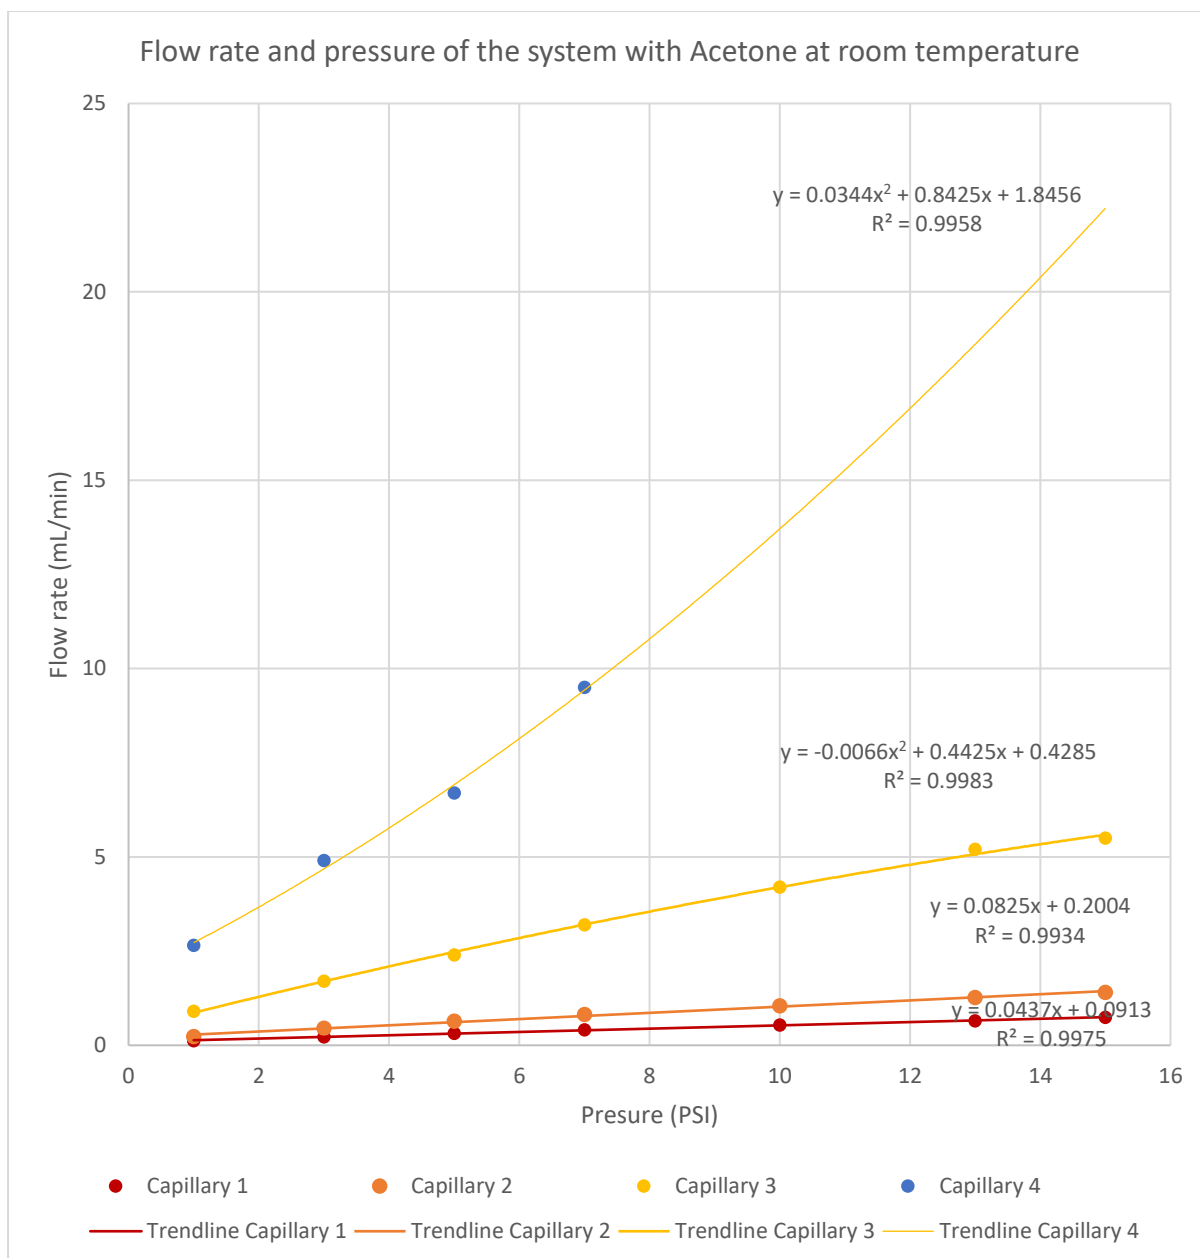

**Supplementary Graph 4:** Selected capillaries to measure the flow rate of Acetone at specific pressures.

| Pressure | Capillary 1 | Capillary 2 | Capillary 3 | Capillary 4 |
|----------|-------------|-------------|-------------|-------------|
| 1        | 0.12        | 0.23        | 0.9         | 2.65        |
| 3        | 0.22        | 0.45        | 1.7         | 4.9         |
| 5        | 0.32        | 0.64        | 2.4         | 6.7         |
| 7        | 0.41        | 0.82        | 3.2         | 9.5         |
| 10       | 0.54        | 1.05        | 4.2         | -           |
| 13       | 0.65        | 1.27        | 5.2         | -           |
| 15       | 0.74        | 1.4         | 5.5         | -           |

**Supplementary Table 26:** Flow rate of Acetone at different pressures and capillaries.

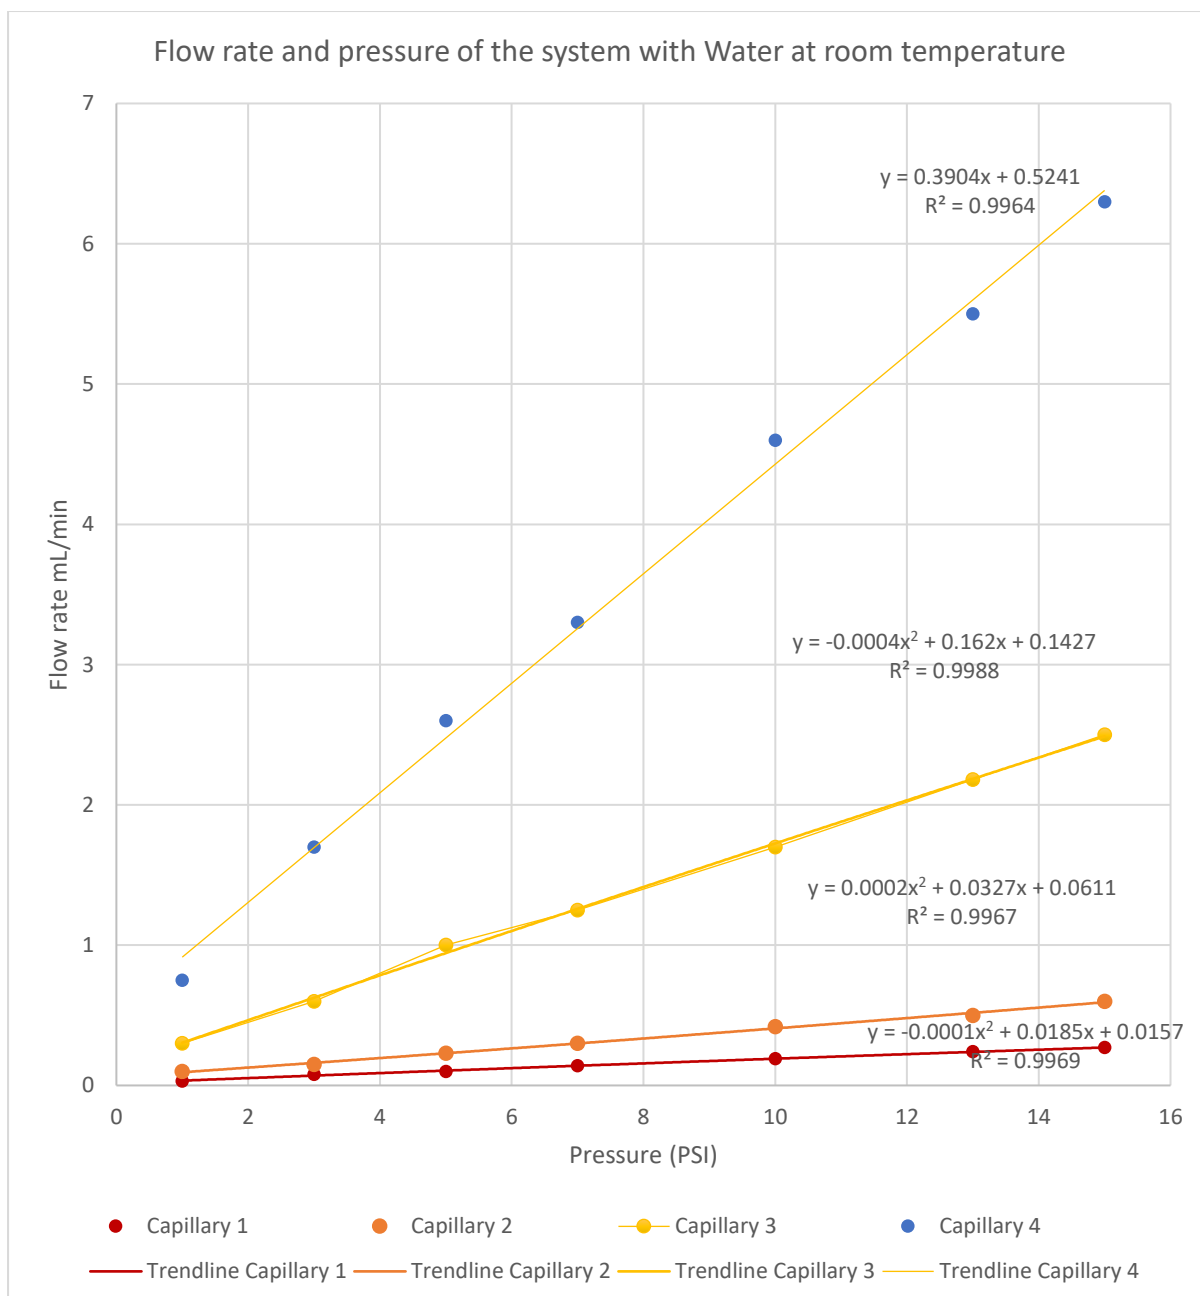

**Supplementary Graph 5:** Selected capillaries to measure the flow rate of Water at specific pressures.

| Pressure | Capillary 1 | Capillary 2 | Capillary 3 | Capillary 4 |
|----------|-------------|-------------|-------------|-------------|
| 1        | 0.03        | 0.1         | 0.3         | 0.75        |
| 3        | 0.08        | 0.15        | 0.6         | 1.7         |
| 5        | 0.1         | 0.23        | 1           | 2.6         |
| 7        | 0.14        | 0.3         | 1.25        | 3.3         |
| 10       | 0.19        | 0.42        | 1.7         | 4.6         |
| 13       | 0.24        | 0.5         | 2.18        | 5.5         |
| 15       | 0.27        | 0.6         | 2.5         | 6.3         |

**Supplementary Table 27:** Flow rate of Water at different pressures and capillaries.

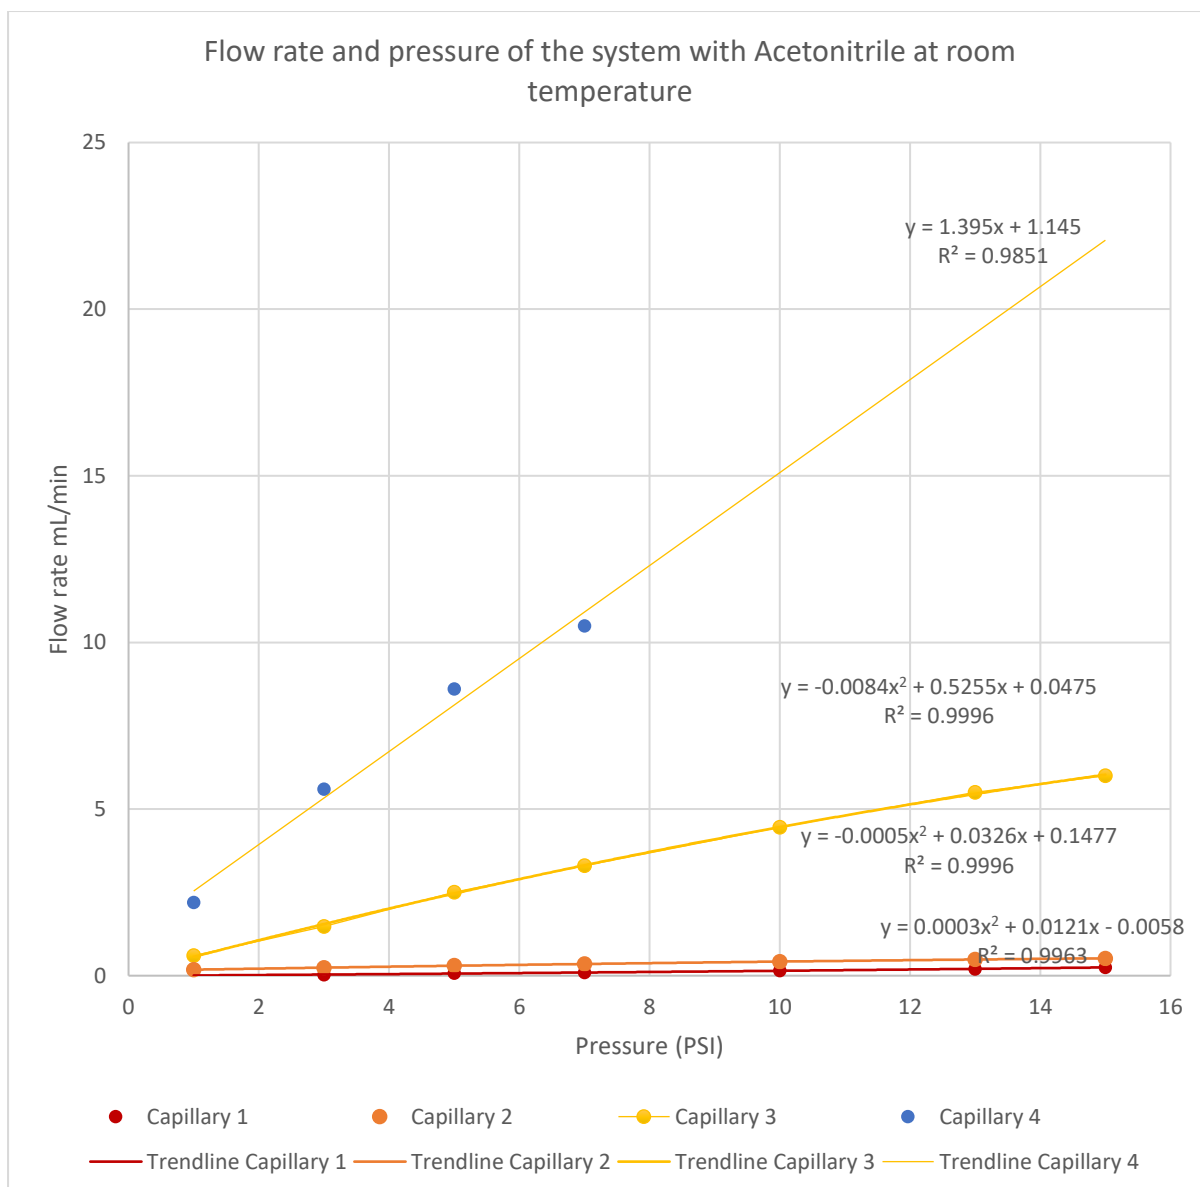

**Supplementary Graph 6:** Selected capillaries to measure the flow rate of Acetonitrile at specific pressures.

| Pressure | Capillary 1 | Capillary 2 | Capillary 3 | Capillary 4 |
|----------|-------------|-------------|-------------|-------------|
| 1        |             | 0.18        | 0.6         | 2.2         |
| 3        | 0.03        | 0.24        | 1.48        | 5.6         |
| 5        | 0.07        | 0.3         | 2.5         | 8.6         |
| 7        | 0.09        | 0.35        | 3.3         | 10.5        |
| 10       | 0.15        | 0.42        | 4.45        | -           |
| 13       | 0.2         | 0.49        | 5.5         | -           |
| 15       | 0.25        | 0.52        | 6           | -           |

**Supplementary Table 28:** Flow rate of Acetonitrile at different pressures and capillaries.

## S.6.8 Arduino Codes

The following code controls the three different modules and sends the measurements to the Meguno Link Interface Platform.

```
#include "MegunoLink.h"
#include "CommandHandler.h"
#include <Wire.h>

#define SolenoidAPIN 4
#define SolenoidBPIN 5
#define LEDPIN 13
#define beta 3950
#define resistance 10

int ThermistorPin = 0;
int Vo;
float R1 = 2252;
float logR2, R2, T;
float A = 1.484778004e-03, B =
2.348962910e-04, C = 1.006037158e-07;
unsigned long StartMillis = 0;
float TotalMillis;
float Pressure;
float Capillary;
float InjectionVolume;
float Solvent;
float CDRType1;
float CDRType3;
float LOOPA;
float LOOPB;
float PreCollect;
float PostCollect;
float FinalWash;
float SystemVolume;
float TotalVolume;
float TotalTime;
float Progress;
float Eflowrate;
boolean ReactionRUN = false;
boolean TemperatureStart = false;
boolean TemperatureStop;
boolean FlowStart = false;
boolean FlowStop;
boolean PhotoStart = false;
boolean PhotoStop;
const int ADDRESS = 0x08;

const float SCALE_FACTOR_FLOW =
500.0;
uint16_t sensor_flow_value;
CommandHandler<>
SerialCommandHandler;
long LastSent;

const unsigned SendInterval = 200;

XYPlot TempPlot("Temperature Readings"),
FlowPlot ("Flow rate readings"),
PhotoPlot("Photochemical and temperature
measurements");
InterfacePanel MyPanel;
void
Cmd_SolenoidAON(CommandParameter
&Parameters)
{ digitalWrite(SolenoidAPIN,HIGH);
digitalWrite(LEDPIN, HIGH); }

void
Cmd_SolenoidAOFF(CommandParameter
&Parameters)
{ digitalWrite(SolenoidAPIN,LOW);
digitalWrite(LEDPIN,LOW); }

void
Cmd_SolenoidBON(CommandParameter
&Parameters)
{ digitalWrite(SolenoidBPIN,HIGH); }

void
Cmd_SolenoidBOFF(CommandParameter
&Parameters)
{ digitalWrite(SolenoidBPIN,LOW);}

void
Cmd_ContinuousRUNON(CommandParam
eter &Parameters)
{ digitalWrite(SolenoidAPIN,HIGH);
digitalWrite(SolenoidBPIN,HIGH);}
```

```

void
Cmd_ContinuousRUNOFF(CommandParameter
&Parameters)
{ digitalWrite(SolenoidAPIN,LOW);
digitalWrite(SolenoidBPIN,LOW);

MyPanel.SetProgress(("ReactionProgressB
ar"), 0); }

void
Cmd_ReactionRUN(CommandParameter
&Parameters)
{Pressure=Parameters.NextParameterAsInt
eger(Pressure);
InjectionVolume=Parameters.NextParamete
rAsInteger(InjectionVolume);
Capillary=Parameters.NextParameterAsInte
ger(Capillary);
digitalWrite(SolenoidAPIN,HIGH);
digitalWrite(SolenoidBPIN, HIGH);
ReactionRUN = true;
StartMillis = millis();
MyPanel.SetText(("TotalVolume"),(TotalVolu
me+InjectionVolume));
MyPanel.SetProgress(("ReactionProgressB
ar"), 0);
MyPanel.SetText(F("Progress"), ((millis()-
StartMillis)/TotalMillis)*100);
MyPanel.SetText(F("TotalTime"),
(TotalTime));
MyPanel.SetText(F("Eflowrate"),
(Eflowrate));
}

void
Cmd_SETSYSTEM(CommandParameter
&Parameters)
{CDRType1=Parameters.NextParameterAsI
nteger(CDRType1);
CDRType3=Parameters.NextParameterAsIn
teger(CDRType3);
LOOPA=Parameters.NextParameterAsInteg
er(LOOPA);
LOOPB=Parameters.NextParameterAsInteg
er(LOOPB);
PreCollect=Parameters.NextParameterAsInt
eger(PreCollect);
PostCollect=Parameters.NextParameterAsI
nteger(PostCollect);

```

```

FinalWash=Parameters.NextParameterAsInt
eger(FinalWash);
SystemVolume=Parameters.NextParameter
AsInteger(SystemVolume);
Solvent=Parameters.NextParameterAsInteg
er(Solvent);

if (CDRType1>=1){
TotalVolume=((CDRType1*3)+(PreCollect)+
(PostCollect)+(SystemVolume)); }

else if (CDRType3>=1){
TotalVolume=((CDRType3*2.8)+(PreCollect
)+(PostCollect)+(SystemVolume)); }
}

void
Cmd_TemperatureStart(CommandParamet
er &params){
TemperatureStart = true; }

void
Cmd_TemperatureStop(CommandParamete
r &params){
TemperatureStart = false; }

void Cmd_FlowStart(CommandParameter
&params){
FlowStart = true; }

void Cmd_FlowStop(CommandParameter
&params){
FlowStart = false; }

void Cmd_PhotoStart(CommandParameter
&params){
PhotoStart = true; }

void Cmd_PhotoStop(CommandParameter
&params){
PhotoStart = false; }

void setup(){
Serial.begin(9600);
Wire.begin();

Serial.println("MegunoLink Pro - Turning
Solenoids on and off");

```

```

Serial.println("-----");
SerialCommandHandler.AddCommand(F("S
olenoidAON"), Cmd_SolenoidAON);
SerialCommandHandler.AddCommand(F("S
olenoidAOFF"), Cmd_SolenoidAOFF);
SerialCommandHandler.AddCommand(F("S
olenoidBON"), Cmd_SolenoidBON);
SerialCommandHandler.AddCommand(F("S
olenoidBOFF"), Cmd_SolenoidBOFF);
SerialCommandHandler.AddCommand(F("C
ontinuousRUNON"),
Cmd_ContinuousRUNON);
SerialCommandHandler.AddCommand(F("C
ontinuousRUNOFF"),
Cmd_ContinuousRUNOFF);
SerialCommandHandler.AddCommand(F("S
ETSYSTEM"), Cmd_SETSYSTEM);
SerialCommandHandler.AddCommand(F("R
eactionRUN"), Cmd_ReactionRUN);
SerialCommandHandler.AddCommand(F("T
emperatureStart"), Cmd_TemperatureStart);
SerialCommandHandler.AddCommand(F("T
emperatureStop"), Cmd_TemperatureStop);
SerialCommandHandler.AddCommand(F("F
lowStart"), Cmd_FlowStart);
SerialCommandHandler.AddCommand(F("F
lowStop"), Cmd_FlowStop);
SerialCommandHandler.AddCommand(F("P
hotoStart"), Cmd_PhotoStart);
SerialCommandHandler.AddCommand(F("P
hotoStop"), Cmd_PhotoStop);
pinMode(SolenoidAPIN,OUTPUT);
pinMode(SolenoidBPIN,OUTPUT);

LastSent = millis();

TempPlot.SetSeriesProperties("ADCValue1"
, Plot::Red, Plot::Solid, 2, Plot::Square);
TempPlot.SetSeriesProperties("ADCValue2"
, Plot::Blue, Plot::Solid, 2, Plot::Square);
TempPlot.SetSeriesProperties("ADCValue3"
, Plot::Green, Plot::Solid, 2, Plot::Square);
FlowPlot.SetSeriesProperties("Flow rate",
Plot::Magenta, Plot::Solid, 5, Plot::Circle);
PhotoPlot.SetSeriesProperties("ADCValue4"
, Plot::Black, Plot::Solid, 2, Plot::Triangle);

int ret;
do {

```

```

Wire.beginTransmission(ADDRESS);
Wire.write(0xFE);
ret=Wire.endTransmission();
} while (ret !=0);
}

void loop() {

SerialCommandHandler.Process();

if ((ReactionRUN == true)&&(Capillary ==
1)) {
if (Solvent==1){
TotalTime=(((TotalVolume+InjectionVolume)
/((0.018*Pressure)+0.0215))*60000);
TotalMillis=(StartMillis+TotalTime);
Eflowrate=((0.0168*Pressure)+0.02);
if (millis() - StartMillis >=
((InjectionVolume/((0.018*Pressure)+0.0215
))*60000)) {
digitalWrite(SolenoidAPIN,LOW);
digitalWrite(SolenoidBPIN,LOW);
ReactionRUN = false; }
}

else if (Solvent==2){
TotalTime=(((TotalVolume+InjectionVolume)
/((0.0407*Pressure)+0.085))*60000);
TotalMillis=(StartMillis+TotalTime);
Eflowrate=((0.0437*Pressure)+0.0913);
if (millis() - StartMillis >=
((InjectionVolume/((0.0407*Pressure)+0.085
))*60000)) {
digitalWrite(SolenoidAPIN,LOW);
digitalWrite(SolenoidBPIN,LOW);
ReactionRUN = false; }
}

else if (Solvent==3){
TotalTime=(((TotalVolume+InjectionVolume)
/((0.0291*Pressure)-0.005))*60000);
TotalMillis=(StartMillis+TotalTime);
Eflowrate=((0.0325*Pressure)-0.0065);
if (millis() - StartMillis >=
((InjectionVolume/((0.0291*Pressure)-
0.005))*60000)) {
digitalWrite(SolenoidAPIN,LOW);
digitalWrite(SolenoidBPIN,LOW);
ReactionRUN = false; }
}
}
}

```



```

else if (Solvent==4){
TotalTime=(((TotalVolume+InjectionVolume)
/((0.02156*Pressure)-0.04609))*60000);
TotalMillis=(StartMillis+TotalTime);
Eflowrate=(((0.0229*Pressure)-0.049);
if (millis() - StartMillis >=
((InjectionVolume/((0.02156*Pressure)-
0.04609))*60000)) {
digitalWrite(SolenoidAPIN,LOW);
digitalWrite(SolenoidBPIN,LOW);
ReactionRUN = false; }
}
else if (Solvent==5){
TotalTime=(((TotalVolume+InjectionVolume)
/((0.0095*Pressure)-0.014))*60000);
TotalMillis=(StartMillis+TotalTime);
Eflowrate=(((0.0112*Pressure)-0.0165);
if (millis() - StartMillis >=
((InjectionVolume/((0.0095*Pressure)-
0.014))*60000)) {
digitalWrite(SolenoidAPIN,LOW);
digitalWrite(SolenoidBPIN,LOW);
ReactionRUN = false; }
}

else if (Solvent==6){
TotalTime=(((TotalVolume+InjectionVolume)
/((0.01424*Pressure)-0.02072))*60000);
TotalMillis=(StartMillis+TotalTime);
Eflowrate=(((0.0178*Pressure)-0.0259);
if (millis() - StartMillis >=
((InjectionVolume/((0.01424*Pressure)-
0.02072))*60000)) {
digitalWrite(SolenoidAPIN,LOW);
digitalWrite(SolenoidBPIN,LOW);
ReactionRUN = false; }
}
MyPanel.SetText(F("Progress"), ((millis()-
StartMillis)/TotalTime)*100);
MyPanel.SetText(F("TotalTime"),
(TotalTime/60000));
MyPanel.SetText(F("Eflowrate"),
(Eflowrate));
}

else if ((ReactionRUN ==
true)&&(Capillary== 2)){

if (Solvent==1){
TotalTime=(((TotalVolume+InjectionVolume)
/((0.0375*Pressure)+0.0562))*60000);
TotalMillis=(StartMillis+TotalTime);
Eflowrate=(((0.0357*Pressure)+0.0535);
if (millis() - StartMillis >=
((InjectionVolume/((0.0375*Pressure)+0.056
2))*60000)) {
digitalWrite(SolenoidAPIN,LOW);
digitalWrite(SolenoidBPIN,LOW);
ReactionRUN = false; }
}
else if (Solvent==2){
TotalTime=(((TotalVolume+InjectionVolume)
/((0.0825*Pressure)+0.2004))*60000);
TotalMillis=(StartMillis+TotalTime);
Eflowrate=(((0.0825*Pressure)+0.2004);
if (millis() - StartMillis >=
((InjectionVolume/((0.0825*Pressure)+0.200
4))*60000)) {
digitalWrite(SolenoidAPIN,LOW);
digitalWrite(SolenoidBPIN,LOW);
ReactionRUN = false; }
}

else if (Solvent == 3){
TotalTime=(((TotalVolume+InjectionVolume)
/((0.0513*Pressure)+0.0713))*60000);
TotalMillis=(StartMillis+TotalTime);
Eflowrate=(((0.0513*Pressure)+0.0713);
if (millis() - StartMillis >=
((InjectionVolume/((0.0513*Pressure)+0.071
3))*60000)) {
digitalWrite(SolenoidAPIN,LOW);
digitalWrite(SolenoidBPIN,LOW);
ReactionRUN = false; }
}

else if (Solvent==4){
TotalTime=(((TotalVolume+InjectionVolume)
/((0.03492*Pressure)+0.00324))*60000);
TotalMillis=(StartMillis+TotalTime);
Eflowrate=(((0.0388*Pressure)+0.0036);
if (millis() - StartMillis >=
((InjectionVolume/((0.03492*Pressure)+0.00
324))*60000)) {
digitalWrite(SolenoidAPIN,LOW);
digitalWrite(SolenoidBPIN,LOW);
ReactionRUN = false; }
}
}
}

```

```

else if (Solvent==5){
TotalTime=(((TotalVolume+InjectionVolume)
/((0.01696*Pressure)-0.00308))*60000);
TotalMillis=(StartMillis+TotalTime);
Eflowrate=(((0.0193*Pressure)-0.0035);
if (millis() - StartMillis >=
((InjectionVolume/((0.01696*Pressure)-
0.00308))*60000)) {
digitalWrite(SolenoidAPIN,LOW);
digitalWrite(SolenoidBPIN,LOW);
ReactionRUN = false; }
}

```

```

else if (Solvent==6){
TotalTime=(((TotalVolume+InjectionVolume)
/((0.0244*Pressure)+0.1691))*60000);
TotalMillis=(StartMillis+TotalTime);
Eflowrate=(((0.0244*Pressure)+0.1691);
if (millis() - StartMillis >=
((InjectionVolume/((0.0244*Pressure)+0.169
1))*60000)) {
digitalWrite(SolenoidAPIN,LOW);
digitalWrite(SolenoidBPIN,LOW);
ReactionRUN = false; }
}

```

```

MyPanel.SetText(F("Progress"), ((millis()-
StartMillis)/TotalTime)*100);
MyPanel.SetText(F("TotalTime"),
(TotalTime/60000));
MyPanel.SetText(F("Eflowrate"),
(Eflowrate));
}

```

```

else if ((ReactionRUN == true)&&(Capillary
== 3)) {

```

```

if (Solvent==1){
TotalTime=(((TotalVolume+InjectionVolume)
/((0.1559*Pressure)+0.1585))*60000);
TotalMillis=(StartMillis+TotalTime);
Eflowrate=(((0.01559*Pressure)+0.1585);
if (millis() - StartMillis >=
((InjectionVolume/((0.1559*Pressure)+0.158
5))*60000)) {
digitalWrite(SolenoidAPIN,LOW);
digitalWrite(SolenoidBPIN,LOW);
ReactionRUN = false; }
}

```

```

else if (Solvent==2){
TotalTime=(((TotalVolume+InjectionVolume)
/((0.32*Pressure)+0.71))*60000);
TotalMillis=(StartMillis+TotalTime);
Eflowrate=(((0.3364*Pressure)+0.7051);
if (millis() - StartMillis >=
((InjectionVolume/((0.32*Pressure)+0.71))*6
0000)) {
digitalWrite(SolenoidAPIN,LOW);
digitalWrite(SolenoidBPIN,LOW);
ReactionRUN = false; }
}

```

```

else if (Solvent==3){
TotalTime=(((TotalVolume+InjectionVolume)
/((0.238*Pressure)+0.395))*60000);
TotalMillis=(StartMillis+TotalTime);
Eflowrate=(((0.2268*Pressure)+0.3761);
if (millis() - StartMillis >=
((InjectionVolume/((0.238*Pressure)+0.395))
*60000)) {
digitalWrite(SolenoidAPIN,LOW);
digitalWrite(SolenoidBPIN,LOW);
ReactionRUN = false; }
}

```

```

else if (Solvent==4){
TotalTime=(((TotalVolume+InjectionVolume)
/((0.1332*Pressure)+0.1992))*60000);
TotalMillis=(StartMillis+TotalTime);
Eflowrate=(((0.1436*Pressure)+0.2123);
if (millis() - StartMillis >=
((InjectionVolume/((0.1332*Pressure)+0.199
2))*60000)) {
digitalWrite(SolenoidAPIN,LOW);
digitalWrite(SolenoidBPIN,LOW);
ReactionRUN = false; }
}

```

```

else if (Solvent==5){
TotalTime=(((TotalVolume+InjectionVolume)
/((0.221*Pressure)+0.158))*60000);
TotalMillis=(StartMillis+TotalTime);
Eflowrate=(((0.0784*Pressure)+0.085);
if (millis() - StartMillis >=
((InjectionVolume/((0.221*Pressure)+0.158))
*60000)) {
digitalWrite(SolenoidAPIN,LOW);
digitalWrite(SolenoidBPIN,LOW);
ReactionRUN = false; }
}

```

```

else if (Solvent==6){
TotalTime=(((TotalVolume+InjectionVolume)
/((0.411*Pressure)+0.319))*60000);
TotalMillis=(StartMillis+TotalTime);
Eflowrate=((0.3891*Pressure)+0.4028);
if (millis() - StartMillis >=
((InjectionVolume/((0.411*Pressure)+0.319))
*60000)) {
digitalWrite(SolenoidAPIN,LOW);
digitalWrite(SolenoidBPIN,LOW);
ReactionRUN = false; }
}
MyPanel.SetText(F("Progress"), ((millis()-
StartMillis)/TotalTime)*100);
MyPanel.SetText(F("TotalTime"),
(TotalTime/60000));
MyPanel.SetText(F("Eflowrate"),
(Eflowrate));
}

else if ((ReactionRUN == true)&&(Capillary
== 4)) {

if (Solvent==1){
TotalTime=(((TotalVolume+InjectionVolume)
/((0.401*Pressure)+0.550))*60000);
TotalMillis=(StartMillis+TotalTime);
Eflowrate=((0.3904*Pressure)+0.5241);
if (millis() - StartMillis >=
((InjectionVolume/((0.401*Pressure)+0.550))
*60000)) {
digitalWrite(SolenoidAPIN,LOW);
digitalWrite(SolenoidBPIN,LOW);
ReactionRUN = false; }
}
else if (Solvent==2){
TotalTime=(((TotalVolume+InjectionVolume)
/((1.1175*Pressure)+1.4675))*60000);
TotalMillis=(StartMillis+TotalTime);
Eflowrate=((1.1175*Pressure)+1.4675);
if (millis() - StartMillis >=
((InjectionVolume/((1.1175*Pressure)+1.467
5))*60000)) {
digitalWrite(SolenoidAPIN,LOW);
digitalWrite(SolenoidBPIN,LOW);
ReactionRUN = false; }
}

else if (Solvent==3){

TotalTime=(((TotalVolume+InjectionVolume)
/((0.606*Pressure)+1.23))*60000);
TotalMillis=(StartMillis+TotalTime);
Eflowrate=((0.5513*Pressure)+1.1187);
if (millis() - StartMillis >=
((InjectionVolume/((0.606*Pressure)+1.23))*
60000)) {
digitalWrite(SolenoidAPIN,LOW);
digitalWrite(SolenoidBPIN,LOW);
ReactionRUN = false; }
}

else if (Solvent==4){
TotalTime=(((TotalVolume+InjectionVolume)
/((0.3093*Pressure)+0.5240))*60000);
TotalMillis=(StartMillis+TotalTime);
Eflowrate=((0.3362*Pressure)+0.5696);
if (millis() - StartMillis >=
((InjectionVolume/((0.3093*Pressure)+0.524
0))*60000)) {
digitalWrite(SolenoidAPIN,LOW);
digitalWrite(SolenoidBPIN,LOW);
ReactionRUN = false; }
}

else if (Solvent==5){
TotalTime=(((TotalVolume+InjectionVolume)
/((0.221*Pressure)+0.158))*60000);
TotalMillis=(StartMillis+TotalTime);
Eflowrate=((0.221*Pressure)+0.158);
if (millis() - StartMillis >=
((InjectionVolume/((0.221*Pressure)+0.158))
*60000)) {
digitalWrite(SolenoidAPIN,LOW);
digitalWrite(SolenoidBPIN,LOW);
ReactionRUN = false; }
}

else if (Solvent==6){
TotalTime=(((TotalVolume+InjectionVolume)
/((1.395*Pressure)+1.145))*60000);
TotalMillis=(StartMillis+TotalTime);
Eflowrate=((1.395*Pressure)+1.145);
if (millis() - StartMillis >=
((InjectionVolume/((1.395*Pressure)+1.145))
*60000)) {
digitalWrite(SolenoidAPIN,LOW);
digitalWrite(SolenoidBPIN,LOW);
ReactionRUN = false; }
}
}

```

```

MyPanel.SetText(F("Progress"), ((millis()-
StartMillis)/TotalTime)*100);
MyPanel.SetText(F("TotalTime"),
(TotalTime/60000));
MyPanel.SetText(F("Eflowrate"),
(Eflowrate));
}

if ((TemperatureStart == true)&& ((millis() -
LastSent) > SendInterval)) {
    LastSent=millis();
    long temp1 =1023 - analogRead (A0);
    float sensor1 = beta /(log(((1025.0 * 10 /
temp1) - 10) / 10) + beta / 298.0) - 273.0;
    long temp2 =1023 - analogRead (A1);
    float sensor2 = beta /(log(((1025.0 * 10 /
temp2) - 10) / 10) + beta / 298.0) - 273.0;
    long temp3 =1023 - analogRead (A2);
    float sensor3 = beta /(log(((1025.0 * 10 /
temp3) - 10) / 10) + beta / 298.0) - 273.0;
    TempPlot.SendData("ADCValue1",
millis(),sensor1);
    TempPlot.SendData("ADCValue2",
millis(),sensor2);
    TempPlot.SendData("ADCValue3",
millis(),sensor3);
}
if (TemperatureStop== false){
}

if ((FlowStart == true)&& ((millis() -
LastSent) > SendInterval)&& (Solvent == 1))
{
    LastSent=millis();
    int ret;
    Wire.beginTransmission(ADDRESS);
    Wire.write(0x36);
    Wire.write(0x08);
    ret = Wire.endTransmission();
    Wire.requestFrom(ADDRESS, 9);
    sensor_flow_value = Wire.read() << 8;
    sensor_flow_value |= Wire.read();
    float flow_value =
((int16_t)sensor_flow_value)/SCALE_FACT
OR_FLOW;
    FlowPlot.SendData("Flow rate",
millis(),flow_value);
}

```

```

else if ((FlowStart == true)&& ((millis() -
LastSent) > SendInterval)&& (Solvent == 2))
{
    LastSent=millis();
    int ret;
    Wire.beginTransmission(ADDRESS);
    Wire.write(0x36);
    Wire.write(0x08);
    ret = Wire.endTransmission();
    Wire.requestFrom(ADDRESS, 9);
    sensor_flow_value = Wire.read() << 8;
    sensor_flow_value |= Wire.read();
    float flow_value = ((5*(pow(10,(-
5))))*(pow((int16_t)sensor_flow_value,2))+0
.0051*sensor_flow_value)+0.0215);
    FlowPlot.SendData("Flow rate",
millis(),flow_value);
}

else if ((FlowStart == true)&& ((millis() -
LastSent) > SendInterval)&& (Solvent == 3))
{
    LastSent=millis();
    int ret;
    Wire.beginTransmission(ADDRESS);
    Wire.write(0x36);
    Wire.write(0x08);
    ret = Wire.endTransmission();
    Wire.requestFrom(ADDRESS, 9);
    sensor_flow_value = Wire.read() << 8;
    sensor_flow_value |= Wire.read();
    float flow_value = (pow(10,(-
5))*(pow((int16_t)sensor_flow_value,2))+0.
0071*sensor_flow_value)-0.0918);
    FlowPlot.SendData("Flow rate",
millis(),flow_value);
    FlowPlot.SendData("sensor",
millis(),sensor_flow_value);
}

else if ((FlowStart == true)&& ((millis() -
LastSent) > SendInterval)&& (Solvent == 4))
{
    LastSent=millis();
    int ret;
    Wire.beginTransmission(ADDRESS);
    Wire.write(0x36);
    Wire.write(0x08);
    ret = Wire.endTransmission();
    Wire.requestFrom(ADDRESS, 9);

```

```

    sensor_flow_value = Wire.read() << 8;
    sensor_flow_value |= Wire.read();
    float flow_value = ((2*(pow(10,(-
5))))*(pow((int16_t)sensor_flow_value,2)))+(0
.0085*sensor_flow_value)-0.1453);
    FlowPlot.SendData("Flow rate",
millis(),flow_value);
}

```

```

else if ((FlowStart == true)&& ((millis() -
LastSent) > SendInterval)&& (Solvent == 5))
{
    LastSent=millis();
    int ret;
    Wire.beginTransaction(ADDRESS);
    Wire.write(0x36);
    Wire.write(0x08);
    ret = Wire.endTransmission();
    Wire.requestFrom(ADDRESS, 9);
    sensor_flow_value = Wire.read() << 8;
    sensor_flow_value |= Wire.read();
    float flow_value = ((4*(pow(10,(-
5))))*(pow((int16_t)sensor_flow_value,2)))+(0
.0054*sensor_flow_value)-0.0335);
    FlowPlot.SendData("Flow rate",
millis(),flow_value);
}

```

```

else if ((FlowStart == true)&& ((millis() -
LastSent) > SendInterval)&& (Solvent == 6))
{
    LastSent=millis();
    int ret;
    Wire.beginTransaction(ADDRESS);
    Wire.write(0x36);
    Wire.write(0x08);
    ret = Wire.endTransmission();
    Wire.requestFrom(ADDRESS, 9);

```

```

    sensor_flow_value = Wire.read() << 8;
    sensor_flow_value |= Wire.read();
    float flow_value = ((3*(pow(10,(-
5))))*(pow((int16_t)sensor_flow_value,2)))+(0
.0022*sensor_flow_value)+0.1508);
    FlowPlot.SendData("Flow rate",
millis(),flow_value);
    FlowPlot.SendData("sensor",
millis(),sensor_flow_value);
}

```

```

if ((PhotoStart == true)&& ((millis() -
LastSent) > SendInterval)) {
    LastSent=millis();
    long temp4 =1023 - analogRead (A3);
    float sensor4 = beta /(log(((1025.0 * 10 /
temp4) - 10) / 10) + beta / 298.0) - 273.0;
    PhotoPlot.SendData("ADCValue4",
millis(),sensor4);
}
if (PhotoStop== false){
}

```

```

if ((millis()-StartMillis)/TotalTime < 1){
    MyPanel.SetText(F("Progress"), ((millis()-
StartMillis)/TotalTime)*100);
}

```

```

else if ((millis()-StartMillis)/TotalTime == 1){
    MyPanel.SetText(F("Progress"), 100);
}

```

```

else if ((millis()-StartMillis)/TotalTime > 1){
    MyPanel.SetText(F("Progress"), 100);
}
MyPanel.SetProgress(F("ReactionProgress
Bar"), ((millis()-StartMillis)/TotalTime)*100);

```

## S.7 Ultimaker Cura Settings

### S.7.1. PLA 3D Printing settings without support

|                              |                |                                    |                |
|------------------------------|----------------|------------------------------------|----------------|
| <b>Material</b>              | PLA            | <b>Profile</b>                     | Normal 0.15 mm |
| <b>Print Core</b>            | AA 0.4         | <b>Speed</b>                       |                |
| <b>Quality</b>               |                | Print Speed                        | 70 mm/s        |
| Layer height                 | 0.15 mm        | Infill Speed                       | 70 mm/s        |
| Initial layer height         | 0.27 mm        | Wall Speed                         | 55 mm/s        |
| Line Width                   | 0.35 mm        | Outer Wall Speed                   | 50 mm/s        |
| Wall Line Width              | 0.35 mm        | Inner Wall Speed                   | 55 mm/s        |
| Outer Wall Line Width        | 0.35 mm        | Top/Bottom Speed                   | 40 mm/s        |
| Inner Wall(s) Line Width     | 0.3 mm         | Travel Speed                       | 250 mm/s       |
| Top/Bottom Line Width        | 0.35 mm        | Initial Layer Speed                | 20 mm/s        |
| Infill Line Width            | 0.42 mm        | Skirt/Brim Speed                   | 20 mm/s        |
| Initial Layer Line Width     | 120 %          | Enable Acceleration Control        | Tick           |
| <b>Shell</b>                 |                | Enable Jerk Control                | Tick           |
| Wall Extruder                | Not overridden | <b>Travel</b>                      |                |
| Outer Wall Extruder          | Not overridden | Enable Retraction                  | Tick           |
| Inner Wall Extruder          | Not overridden | Retract at Layer Change            | Blank          |
| Wall Thickness               | 1 mm           | Retraction Distance                | 6.5 mm         |
| Wall Line Count              | 3              | Retraction Speed                   | 25 mm/s        |
| Top/Bottom Extruder          | Not overridden | Combing Mode                       | All            |
| Top/Bottom Thickness         | 1 mm           | Avoid Printer Parts When traveling | Tick           |
| Top thickness                | 1 mm           | Avoid Supports When Traveling      | Blank          |
| Top layers                   | 10             | Travel Avoid Distance              | 3 mm           |
| Bottom Thickness             | 1 mm           | Z Hop When Retracted               | Tick           |
| Bottom Layers                | 10             | Z Hop Only Over Printed Parts      | Tick           |
| Optimize Wall Printing Order | Tick           | Z Hop Height                       | 2 mm           |
| Fill Gaps Between Walls      | Everywhere     | Z Hop After Extruder Switch        | Tick           |
| Horizontal Expansions        | 0 mm           | <b>Cooling</b>                     |                |
| Enable ironing               | Blank          | Enable Print Cooling               | Tick           |
| <b>Infill</b>                |                | Fan Speed                          | 100 %          |
| Infill Extruder              | Not overridden | Regular Fan Speed                  | 100 %          |

|                                       |            |                                     |                      |
|---------------------------------------|------------|-------------------------------------|----------------------|
| Infill Density                        | 20 %       | Maximum Fan Speed                   | 100 %                |
| Infill Line Distance                  | 6.3 mm     | Regular/Maximum Fan Speed Threshold | 10 s                 |
| Infill Patter                         | Triangles  | Initial Fan Speed                   | 0 %                  |
| Infill Line Multiplier                | 1          | Regular Fan Speed at Height         | 0.47 mm              |
| Infill overlap Percentage             | 0 %        | Regular Fan Speed at Layer          | 4                    |
| Infill layer Thickness                | 0.1mm      | Minimum Layer Time                  | 5 s                  |
| Gradual Infill Steps                  | 0          | Minimum Speed                       | 5 mm/ s              |
| <b>Material</b>                       |            | Lift Head                           | Blank                |
| Printing Temperature                  | 205 °C     | <b>Support</b>                      |                      |
| Printing Temperature Initial Layer    | 210 °C     | Generate Support                    | Tick                 |
| Initial Printing Temperature          | 195 °C     | Support Extruder                    | Extruder 1           |
| Final Printing Temperature            | 190 °C     | Support Infill Extruder             | Extruder 1           |
| Build Plate Temperature               | 60 °C      | First Layer Support Extruder        | Extruder 1           |
| Build Plate Temperature Initial Layer | 60 °C      | Support Interface Extruder          | Extruder 1           |
| Standby Temperature                   | 100 °C     | Support Structure                   | Normal               |
| <b>Dual Extrusions</b>                |            | Support Placement                   | Touching Build plate |
| Enable Prime Tower                    | Blank      | Support Overhang Angle              | 60 °                 |
| <b>Special Modes</b>                  |            | Support Pattern                     | Zig Zag              |
| Surface Mode                          | Normal     | Support Density                     | 15 %                 |
| Spiralize Outer Contour               | Blank      | Support Horizontal Expansion        | 0 mm                 |
| <b>Build Plate Adhesion</b>           |            | Support Infill Layer Thickness      | 0.1 mm               |
| Enable Prime Blob                     | Tick       | Gradual Support Infill Steps        | 0                    |
| Build Plate Adhesion Type             | Brim       | Enable Support Interface            | Blank                |
| Build Plate Adhesion Extruder         | Extruder 1 | Enable Support Roof                 | Blank                |
| Brim Width                            | 7 mm       | Enable Support Floor                | Blank                |
| Brim Line Count                       | 17         | <b>Experimental</b>                 |                      |
| Brim Only on Outside                  | Tick       | Make Overhang printable             | Blank                |
|                                       |            | Use adaptive layers                 | Blank                |

**Supplementary Table 29:** PLA 3D Printing settings without support.

## S.7.2. PLA 3D Printing settings with support

|                              |                |                                    |                 |
|------------------------------|----------------|------------------------------------|-----------------|
| <b>Material</b>              | <b>PLA</b>     | <b>Quantity</b>                    | 131 g – 16.53 m |
| <b>Print Core</b>            | AA 0.4         | <b>Speed</b>                       |                 |
| <b>Quality</b>               |                | Print Speed                        | 70 mm/s         |
| Layer height                 | 0.15 mm        | Infill Speed                       | 70 mm/s         |
| Initial layer height         | 0.27 mm        | Wall Speed                         | 55 mm/s         |
| Line Width                   | 0.35 mm        | Outer Wall Speed                   | 50 mm/s         |
| Wall Line Width              | 0.35 mm        | Inner Wall Speed                   | 55 mm/s         |
| Outer Wall Line Width        | 0.35 mm        | Top/Bottom Speed                   | 40 mm/s         |
| Inner Wall(s) Line Width     | 0.3 mm         | Travel Speed                       | 250 mm/s        |
| Top/Bottom Line Width        | 0.35 mm        | Initial Layer Speed                | 20 mm/s         |
| Infill Line Width            | 0.42 mm        | Skirt/Brim Speed                   | 20 mm/s         |
| Initial Layer Line Width     | 120 %          | Enable Acceleration Control        | Tick            |
| <b>Shell</b>                 |                | Enable Jerk Control                | Tick            |
| Wall Extruder                | Not overridden | <b>Travel</b>                      |                 |
| Outer Wall Extruder          | Not overridden | Enable Retraction                  | Tick            |
| Inner Wall Extruder          | Not overridden | Retract at Layer Change            | Blank           |
| Wall Thickness               | 1 mm           | Retraction Distance                | 6.5 mm          |
| Wall Line Count              | 3              | Retraction Speed                   | 25 mm/s         |
| Top/Bottom Extruder          | Not overridden | Combing Mode                       | All             |
| Top/Bottom Thickness         | 1 mm           | Avoid Printer Parts When traveling | Tick            |
| Top thickness                | 1 mm           | Avoid Supports When Traveling      | Blank           |
| Top layers                   | 10             | Travel Avoid Distance              | 3 mm            |
| Bottom Thickness             | 1 mm           | Z Hop When Retracted               | Tick            |
| Bottom Layers                | 10             | Z Hop Only Over Printed Parts      | Tick            |
| Optimize Wall Printing Order | Tick           | Z Hop Height                       | 2 mm            |
| Fill Gaps Between Walls      | Everywhere     | Z Hop After Extruder Switch        | Tick            |
| Horizontal Expansions        | 0 mm           | <b>Cooling</b>                     |                 |
| Enable ironing               | Blank          | Enable Print Cooling               | Tick            |
| <b>Infill</b>                |                | Fan Speed                          | 100 %           |
| Infill Extruder              | Not overridden | Regular Fan Speed                  | 100 %           |
| Infill Density               | 20 %           | Maximum Fan Speed                  | 100 %           |



|                                       |            |                                     |                      |
|---------------------------------------|------------|-------------------------------------|----------------------|
| Infill Line Distance                  | 6.3 mm     | Regular/Maximum Fan Speed Threshold | 10 s                 |
| Infill Patter                         | Triangles  | Initial Fan Speed                   | 0%                   |
| Infill Line Multiplier                | 1          | Regular Fan Speed at Height         | 0.47 mm              |
| Infill overlap Percentage             | 0 %        | Regular Fan Speed at Layer          | 4                    |
| Infill layer Thickness                | 0.1 mm     | Minimum Layer Time                  | 5 s                  |
| Gradual Infill Steps                  | 0          | Minimum Speed                       | 5 mm/s               |
| <b>Material</b>                       |            | Lift Head                           | Blank                |
| Printing Temperature                  | 205 °C     | <b>Support</b>                      |                      |
| Printing Temperature Initial Layer    | 210 °C     | Generate Support                    | Tick                 |
| Initial Printing Temperature          | 195 °C     | Support Extruder                    | Extruder 1           |
| Final Printing Temperature            | 190 °C     | Support Infill Extruder             | Extruder 1           |
| Build Plate Temperature               | 60 °C      | First Layer Support Extruder        | Extruder 1           |
| Build Plate Temperature Initial Layer | 60 °C      | Support Interface Extruder          | Extruder 1           |
| Standby Temperature                   | 100 °C     | Support Structure                   | Normal               |
| <b>Dual Extrusions</b>                |            | Support Placement                   | Touching Build plate |
| Enable Prime Tower                    | Blank      | Support Overhang Angle              | 60°                  |
| <b>Special Modes</b>                  |            | Support Pattern                     | Zig Zag              |
| Surface Mode                          | Normal     | Support Density                     | 15 %                 |
| Spiralize Outer Contour               | Blank      | Support Horizontal Expansion        | 0 mm                 |
| <b>Build Plate Adhesion</b>           |            | Support Infill Layer Thickness      | 0.1 mm               |
| Enable Prime Blob                     | Tick       | Gradual Support Infill Steps        | 0                    |
| Build Plate Adhesion Type             | Brim       | Enable Support Interface            | Blank                |
| Build Plate Adhesion Extruder         | Extruder 1 | Enable Support Roof                 | Blank                |
| Brim Width                            | 7 mm       | Enable Support Floor                | Blank                |
| Brim Line Count                       | 17         | <b>Experimental</b>                 |                      |
| Brim Only on Outside                  | Tick       | Make Overhang printable             | Blank                |
|                                       |            | Use adaptive layers                 | Blank                |

**Supplementary Table 30: PLA 3D Printing settings with support.**

This design requires support printing because a part of it is not in contact with the plate and thus will not print correctly.

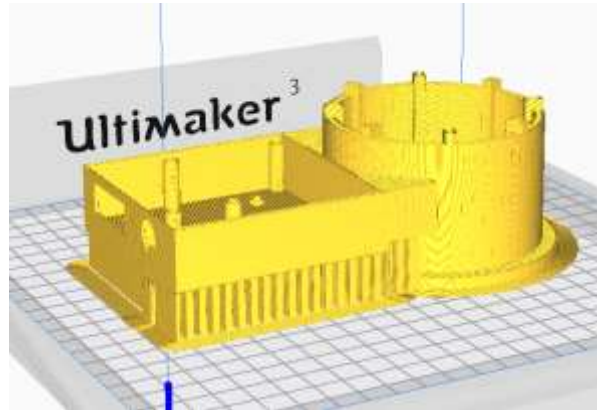

**Supplementary Figure 82:** Cura preview file showing the Phototemperature Sensor Module with the support placement to 3D print.

### S.7.3. PP 3D Printing settings

|                          |                |                                    |                |
|--------------------------|----------------|------------------------------------|----------------|
| <b>Material</b>          | PP             | <b>Profile</b>                     | Normal 0.15 mm |
| <b>Print Core</b>        | AA 0.4         | <b>Speed</b>                       |                |
| <b>Quality</b>           |                | Print Speed                        | 25 mm/s        |
| Layer height             | 0.15 mm        | Infill Speed                       | 25 mm/s        |
| Initial layer height     | 0.27 mm        | Wall Speed                         | 25 mm/s        |
| Line Width               | 0.38 mm        | Outer Wall Speed                   | 25 mm/s        |
| Wall Line Width          | 0.38 mm        | Inner Wall Speed                   | 25 mm/s        |
| Outer Wall Line Width    | 0.38 mm        | Top/Bottom Speed                   | 25 mm/s        |
| Inner Wall(s) Line Width | 0.38 mm        | Travel Speed                       | 300 mm/s       |
| Top/Bottom Line Width    | 0.38 mm        | Initial Layer Speed                | 15 mm/s        |
| Infill Line Width        | 0.38 mm        | Skirt/Brim Speed                   | 15 mm/s        |
| Initial Layer Line Width | 120 %          | Enable Acceleration Control        | Tick           |
| <b>Shell</b>             |                | Enable Jerk Control                | Tick           |
| Wall Extruder            | Not overridden | <b>Travel</b>                      |                |
| Outer Wall Extruder      | Not overridden | Enable Retraction                  | Tick           |
| Inner Wall Extruder      | Not overridden | Retract at Layer Change            | Blank          |
| Wall Thickness           | 1.14 mm        | Retraction Distance                | 6.5 mm         |
| Wall Line Count          | 3              | Retraction Speed                   | 35 mm/s        |
| Top/Bottom Extruder      | Not overridden | Combing Mode                       | All            |
| Top/Bottom Thickness     | 1.1 mm         | Avoid Printer Parts When traveling | Tick           |

|                                       |                |                                     |            |
|---------------------------------------|----------------|-------------------------------------|------------|
| Top thickness                         | 1.1 mm         | Avoid Supports When Traveling       | Blank      |
| Top layers                            | 0              | Travel Avoid Distance               | 3 mm       |
| Bottom Thickness                      | 1.1 mm         | Z Hop When Retracted                | Tick       |
| Bottom Layers                         | 999999         | Z Hop Only Over Printed Parts       | Tick       |
| Optimize Wall Printing Order          | Tick           | Z Hop Height                        | 2 mm       |
| Fill Gaps Between Walls               | Everywhere     | Z Hop After Extruder Switch         | Tick       |
| Horizontal Expansions                 | 0mm            | <b>Cooling</b>                      |            |
| Enable ironing                        | Blank          | Enable Print Cooling                | Tick       |
| <b>Infill</b>                         |                | Fan Speed                           | 20 %       |
| Infill Extruder                       | Not overridden | Regular Fan Speed                   | 20 %       |
| Infill Density                        | 100 %          | Maximum Fan Speed                   | 100 %      |
| Infill Line Distance                  | 0.76 mm        | Regular/Maximum Fan Speed Threshold | 7 s        |
| Infill Patter                         | Octet          | Initial Fan Speed                   | 0 %        |
| Infill Line Multiplier                | 1              | Regular Fan Speed at Height         | 0.87 mm    |
| Infill overlap Percentage             | 0 %            | Regular Fan Speed at Layer          | 6          |
| Infill layer Thickness                | 0.15 mm        | Minimum Layer Time                  | 7 s        |
| Gradual Infill Steps                  | 0              | Minimum Speed                       | 2.5 mm/s   |
| <b>Material</b>                       |                | Lift Head                           | Blank      |
| Printing Temperature                  | 235 °C         | <b>Support</b>                      |            |
| Printing Temperature Initial Layer    | 240 °C         | Generate Support                    | Blank      |
| Initial Printing Temperature          | 230 °C         | <b>Build Plate Adhesion</b>         |            |
| Final Printing Temperature            | 225 °C         | Enable Prime Blob                   | Tick       |
| Build Plate Temperature               | 85 °C          | Build Plate Adhesion Type           | Brim       |
| Build Plate Temperature Initial Layer | 90 °C          | Build Plate Adhesion Extruder       | Extruder 1 |
| Standby Temperature                   | 100 °C         | Brim Width                          | 20 mm      |
| <b>Dual Extrusions</b>                |                | Brim Line Count                     | 44         |
| Enable Prime Tower                    | Blank          | Brim Only on Outside                | Tick       |
| <b>Special Modes</b>                  |                | <b>Experimental</b>                 |            |
| Surface Mode                          | Normal         | Make Overhang printable             | Blank      |
| Spiralize Outer Contour               | Blank          | Use adaptive layers                 | Blank      |

**Supplementary Table 31: PP 3D Printing settings.**

## S.8 Desings for 3D printed reactors

Different types of reactors were designed to be able to fit a temperature sensor or a temperature probe sensor inside the CDR or the channels. Once the design of the reactors was completed in Tinkercad, they were exported individually as an STL (Standard Tessellation Language) file and uploaded to Cura software. The settings used to print each component are shown in shown in section 7.3. The printing of these reactors need to have post processing modifications which are specified in each reactor section. Finally, the models were sliced and USB-connected to the printer. All the reactors were printed with white Polypropylene 2.85mm filament.

### S.8.1 CDR for the Phototemperature module with a temperature sensor slot

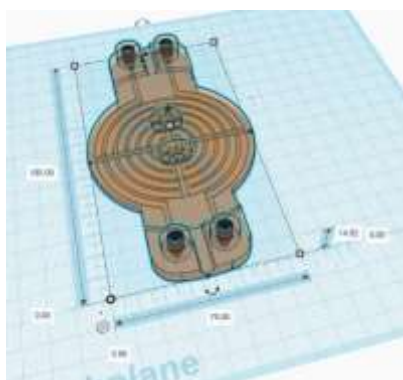

**Supplementary Figure 83:** Tinkercad design illustrating the planned reactor for the Phototemperature module.

|                 |                |
|-----------------|----------------|
| <b>Material</b> | <b>PP</b>      |
| <b>Time</b>     | 6 h 8 min      |
| <b>Quantity</b> | 26 g – 4.63 m  |
| <b>Profile</b>  | Normal 0.15 mm |

**Supplementary Table 32:** Ultimaker Cura Settings for 3D printing of the reactor for the Phototemperature module.

Post processing plugin modifications – change At Z 5.2.1 :

|                        |                        |        |
|------------------------|------------------------|--------|
| <b>Layer number 2</b>  | Flow rate              | 115 °C |
| <b>Layer number 14</b> | Flow rate              | 120 °C |
| <b>Layer number 38</b> | Flow rate              | 100 °C |
|                        | Change extruder 1 Temp | 220 °C |

**Supplementary Table 33:** Ultimaker Cura Post processing modification settings for 3D printing of the reactor for the Phototemperature module.

## S.8.2 CDR with a temperature sensor slot

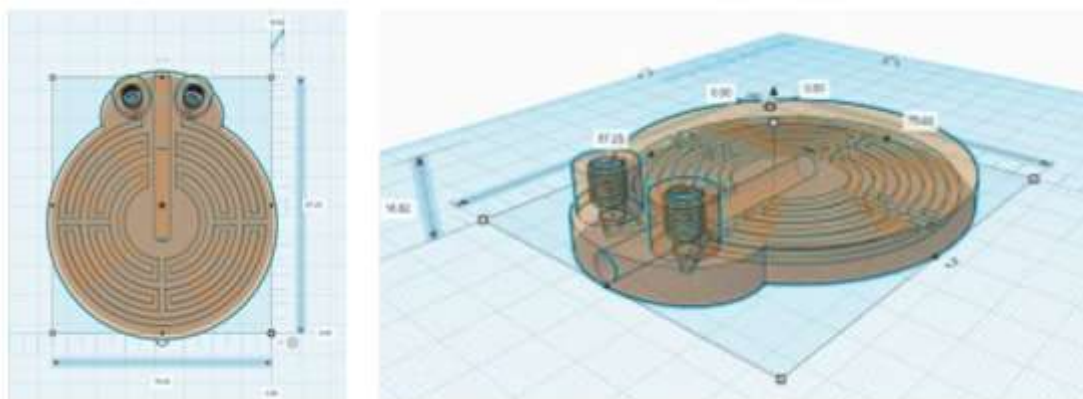

**Supplementary Figure 84:** Tinkercad design illustrating the planned reactor with a temperature sensor slot.

|                 |                |
|-----------------|----------------|
| <b>Material</b> | <b>PP</b>      |
| <b>Time</b>     | 6 h 55 min     |
| <b>Quantity</b> | 30 g – 5.26 m  |
| <b>Profile</b>  | Normal 0.15 mm |

**Supplementary Table 34:** Ultimaker Cura Settings for 3D printing of the reactor with a temperature sensor slot.

Post processing plugin modifications – change At Z 5.2.1 :

|                        |                        |        |
|------------------------|------------------------|--------|
| <b>Layer number 2</b>  | Flow rate              | 115 °C |
| <b>Layer number 27</b> | Flow rate              | 120 °C |
| <b>Layer number 49</b> | Flow rate              | 100 °C |
|                        | Change extruder 1 Temp | 220 °C |

**Supplementary Table 35:** Ultimaker Cura Post processing modification settings for 3D printing of the reactor with a temperature sensor slot.

### S.8.3 CDR with a probe slot inserted into the channel

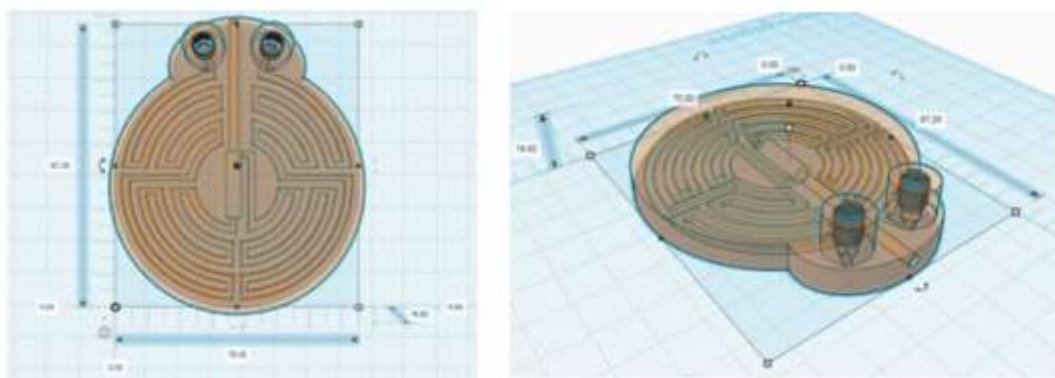

**Supplementary Figure 85:** Tinkercad design illustrating the planned reactor with a probe slot inserted into the channel.

|                 |                |
|-----------------|----------------|
| <b>Material</b> | <b>PP</b>      |
| <b>Time</b>     | 7 h 3 min      |
| <b>Quantity</b> | 30 g – 5.35 m  |
| <b>Profile</b>  | Normal 0.15 mm |

**Supplementary Table 36:** Ultimaker Cura Settings for 3D printing of the reactor inserted into the channel.

Post processing plugin modifications – change At Z 5.2.1 :

|                        |                        |        |
|------------------------|------------------------|--------|
| <b>Layer number 2</b>  | Flow rate              | 115 °C |
| <b>Layer number 27</b> | Flow rate              | 120 °C |
| <b>Layer number 49</b> | Flow rate              | 100 °C |
|                        | Change extruder 1 Temp | 220 °C |

**Supplementary Table 37:** Ultimaker Cura Post processing modification settings for 3D printing of the reactor inserted into the channel.

## S.9 Technical data of electronics

### S.9.1 Arduino boards

The following table lists the technical specifications of the Arduino Uno Wi-Fi Rev 2 and Arduino Mega 2560:

| Arduino Board   |                        | Arduino Uno Wiffi Rev 2                | Arduino Mega                        |
|-----------------|------------------------|----------------------------------------|-------------------------------------|
| Microcontroller |                        | ATmega4809                             | ATmega2560                          |
| Pins            | Built-in LED Pin       | 25                                     | 13                                  |
|                 | Digital I/O input pins | 14                                     | 54                                  |
|                 | Analog input pins      | 6                                      | 16                                  |
|                 | PWM pins               | 5                                      |                                     |
| Connectivity    | Bluetooth and Wi-Fi    | Nina W102 uBlox module                 |                                     |
| Communication   | UART                   | Yes                                    |                                     |
|                 | I2C                    | Yes                                    |                                     |
|                 | SPI                    | Yes                                    |                                     |
| Power           | I/O Voltage            | 5V                                     |                                     |
|                 | Input Voltage          | 7-12V                                  |                                     |
|                 | DC current per I/O Pin | 20mA                                   |                                     |
| Memory          | ATmega4809             | 6KB SRAM, 48KB flash, 256 bytes EEPROM | 8 KB SRAM, 256 KB flash, 4KB EEPROM |
|                 | Nina W102 uBlox module | 448 KB ROM, 520KB SRAM, 2MB Flash      |                                     |
| Dimensions      | Weight                 | 25 g                                   | 37 g                                |
|                 | Width                  | 53.4 mm                                | 53.3 mm                             |
|                 | Length                 | 68.6 mm                                | 101.52 mm                           |

**Supplementary Table 38:** Arduino Uno Wifi Rev 2 and Arduino Mega Features. 2.

### S.9.2 Relay Shield

The relay shield used is the Keyestudio 4-channel Relay shield.

|                           |                        |
|---------------------------|------------------------|
| <b>DC Power Interface</b> | 5V                     |
| <b>Size</b>               | 69 mm x 54 mm x 26 mm  |
| <b>Weight</b>             | 39.4 g                 |
| <b>Contact capacity</b>   | AC120V / 3A ; DC24V/3A |
| <b>Relay channels</b>     | 4 channels             |
| <b>Compatibility</b>      | UNO R3 boards          |

**Supplementary Table 39:** Relay shield Features. 3.

### S.9.3 Temperature Sensor

|                           |                       |
|---------------------------|-----------------------|
| <b>DC Power Interface</b> | 5V                    |
| <b>Size</b>               | 65 mm x 40 mm x 15 mm |
| <b>Weight</b>             | 9.2 g                 |
| <b>Waterproof</b>         | Yes                   |
| <b>Compatibility</b>      | UNO R3 boards         |

**Supplementary Table 40:** Temperature sensor Features.



### S.9.3.1 Calibration

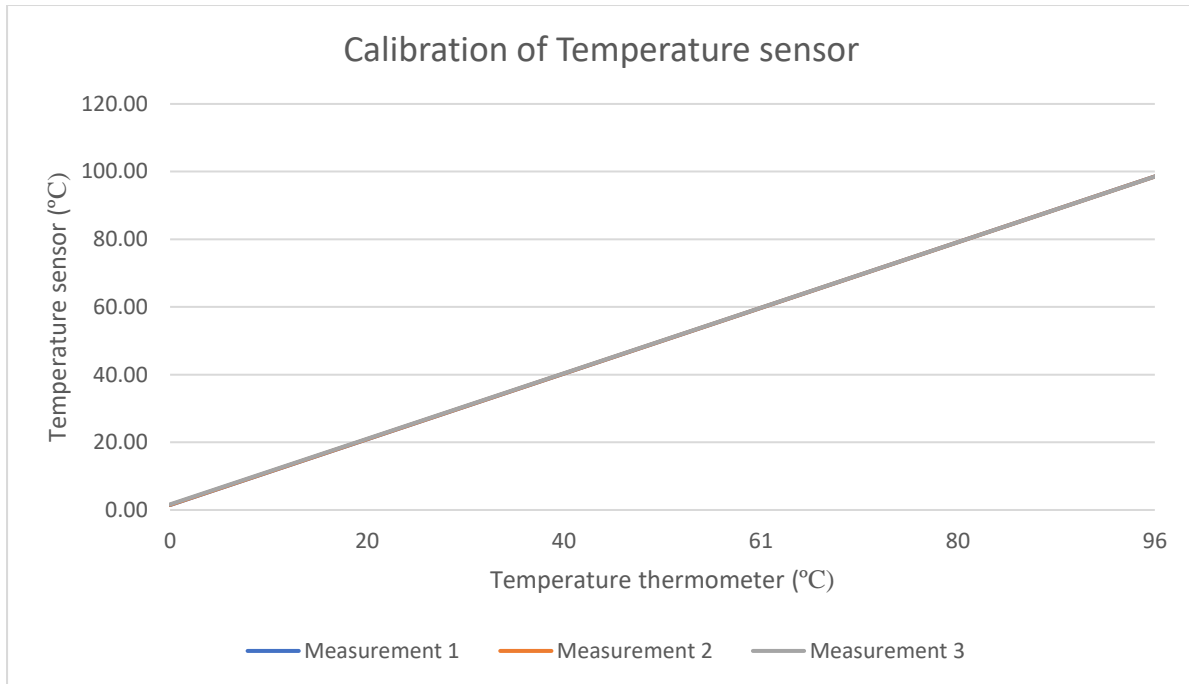

**Supplementary Graph 7:** relation between temperature from three different temperature sensors and a thermometer.

| TEMPERATURE (°C) | 0 °C | 20 °C | 40 °C | 61 °C | 80 °C | 96 °C |
|------------------|------|-------|-------|-------|-------|-------|
| <b>Sensor 1</b>  | 0.92 | 20.32 | 40.41 | 61.34 | 80.60 | 96.50 |
| <b>Sensor 2</b>  | 0.96 | 20.27 | 40.66 | 61.40 | 80.17 | 96.72 |
| <b>Sensor 3</b>  | 1.04 | 20.45 | 40.57 | 61.45 | 80.79 | 96.29 |

**Supplementary Table 41:** Supplementary Table 26: Temperature calibrations.

### S.9.4 Flow rate sensor

The flow rate sensor used is an SLF3S-1300F Liquid Flow sensor from Sensirion.

|                                            |                           |
|--------------------------------------------|---------------------------|
| <b>H<sub>2</sub>O Full scale flow rate</b> | ±40 mL/min                |
| <b>H<sub>2</sub>O Sensor output limit</b>  | ±65 mL/min                |
| <b>Accuracy</b>                            | ±5% of the measured value |
| <b>Typical Supply Voltage DC</b>           | 3.5 V                     |
| <b>Operating Temperature</b>               | +5 ... +50 °C             |

**Supplementary Table 42:** Flow rate Sensor Features.<sup>7</sup>

|                   |                                                              | Product Family         | SLF3S                       | LD20            | LPG10 | SLI, LG16                    | SLS, LS32                   | SLQ-QT               | SLG                    |
|-------------------|--------------------------------------------------------------|------------------------|-----------------------------|-----------------|-------|------------------------------|-----------------------------|----------------------|------------------------|
|                   |                                                              | Wetted Materials       | PPS, Stainless steel, Epoxy | PEI, LCP, Epoxy | Glass | Glass or Quartz, PEEK, (FEP) | Stainless steel, PEEK, PTFE | Quartz, PFA, (PCTFE) | Quartz, Titanium, PEEK |
| Type              | Chemical                                                     | Concentration          |                             |                 |       |                              |                             |                      |                        |
| Aqueous solutions | NaCl (Sodium chloride)                                       | 0.9%                   | +                           | +               | +     | +                            | +                           | +                    | +                      |
|                   | NaOH (Sodium hydroxide)                                      | 1 M (=4%)              | o                           | -               | -     | -                            | +                           | -                    | -                      |
|                   | HCl (Hydrochloric acid)                                      | 1 M (=3%)              | o                           | -               | o     | o                            | -                           | +                    | o                      |
|                   | H2O2 (Hydrogen peroxide)                                     | 30%                    | -                           | -               | +     | +                            | o <sup>1</sup>              | +                    | +                      |
|                   | NaClO (Sodium hypochlorite)                                  | 30%                    | o                           | o               | o     | o                            | o                           | o                    | o                      |
|                   | Ca(ClO) <sub>2</sub> (Calcium hypochlorite)                  | 32%                    | o                           | o               | o     | o                            | o                           | o                    | o                      |
| Organic solvent   | Ethanol<br>IPA (Isopropyl alcohol or 2-propanol)<br>Methanol | 100%                   | +                           | +               | +     | +                            | +                           | +                    | +                      |
|                   | ACN (Acetonitrile)                                           | 10 - 100% <sup>2</sup> | o/-                         | -               | +     | +                            | +                           | +                    | +                      |
|                   | THF (Tetrahydrofuran)                                        | 10 - 100%              | o/-                         | -               | +     | o                            | +/o                         | +                    | o                      |
|                   | DMSO (Dimethylsulfoxid)                                      | 10 - 100%              | o/-                         | -               | +     | o                            | +/o                         | +                    | o                      |
|                   | Acetone                                                      | 100%                   | +                           | -               | +     | +                            | +                           | +                    | +                      |
|                   | Toluene                                                      | 100%                   | o                           | -               | +     | o                            | o                           | +                    | o                      |
|                   | Heptane                                                      | 100%                   | +                           | +               | +     | +                            | +                           | +                    | +                      |
|                   | Gasoline<br>Diesel fuel<br>Kerosene (Jet fuel)               | 100%                   | +                           | o               | +     | +                            | +                           | +                    | +                      |
| Other             | Mineral oil, Vegetable oil                                   | 100%                   | +                           | +               | +     | +                            | +                           | +                    | +                      |
|                   | Silicone oil                                                 | 100%                   | +                           | +               | +     | +                            | +                           | +                    | +                      |
|                   | Engine oil, Lubricant oil                                    | 100%                   | +                           | o               | +     | +                            | +                           | +                    | +                      |

+ : most likely suitable for long term usage  
o : possibly suitable for short/medium duration usage  
- : likely not suitable

**Supplementary Figure 86:** Flow rate sensor liquid chemical compatibilities.<sup>7</sup>

The flow rate sensor SLF3C-1300F was also calibrated. Almost all liquid sensors available on the market have been calibrated with water; however, if other solvents are to be used, the sensor must first be calibrated for each one in order to provide accurate measurements. The Arduino code was modified to remove the conversion of the sensor value to the flow rate so that we could only read the sensor value and correlate it to the flow rate of the solvent under test. The calibrated solvents were selected based on which ones were most probable to be used in reactions; these included isopropanol (IPA), methanol, ethanol, acetone, and acetonitrile. The table of compatibilities (**Sup. Fig. 86**) indicates that all of them, except for acetonitrile, can be used for extended periods of time.

To obtain the correlation between the flow rate and the sensor value, we measured the flow rate of the solvent at room temperature in triplicate at specific sensor value until the entire sensor value range was covered. The 3D printed flow chemistry system uses PEEK capillaries as a back-pressure regulator, however they tend to expand when used with some solvents, such as acetone, so metal capillaries were used to provide a more accurate measurement.

The data from each solvent is shown in the following Graph. In order to calibrate the sensor with acetonitrile, which is not highly compatible with the sensor, fewer values were measured, and the sensor was flushed with ethanol after each measurement to prevent potential damage.

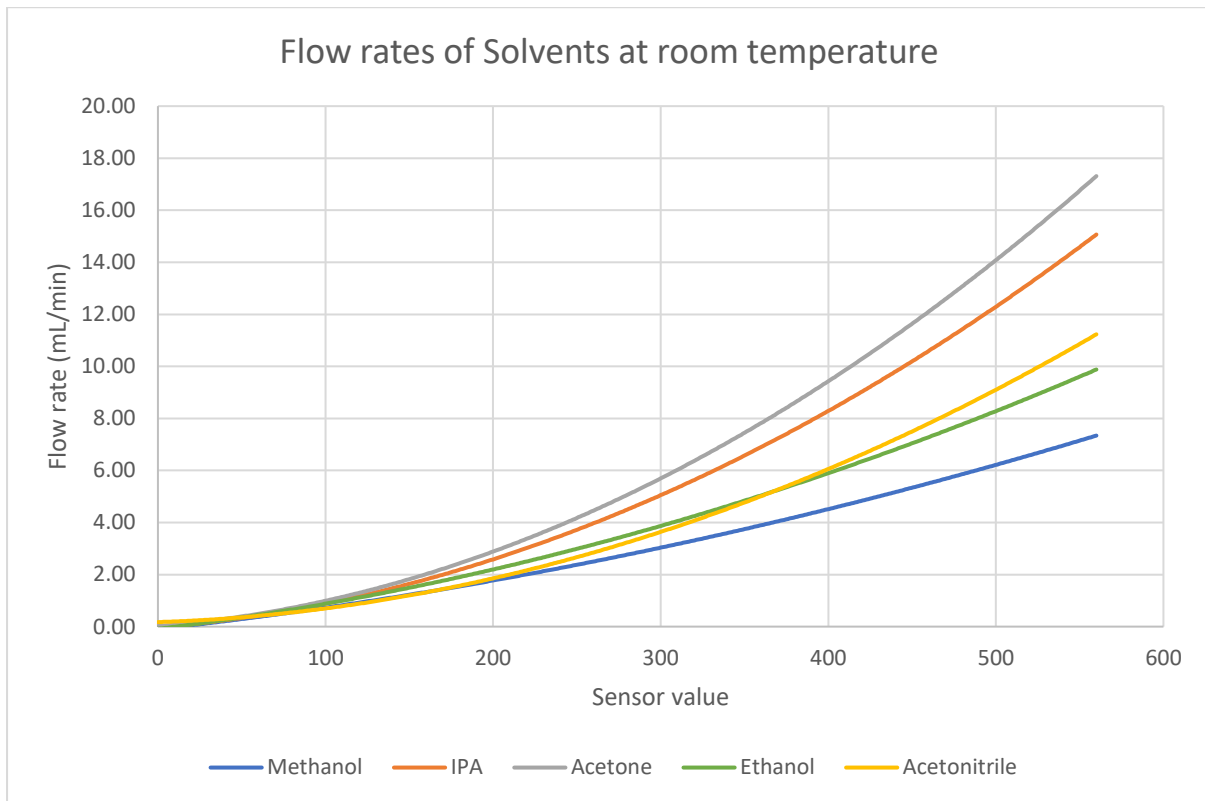

**Supplementary Graph 8:** Correlation of the flow rates of multiple solvents and the liquid flow sensor value at room temperature.

### S.9.4.1 Flow rate sensor calibration Methanol

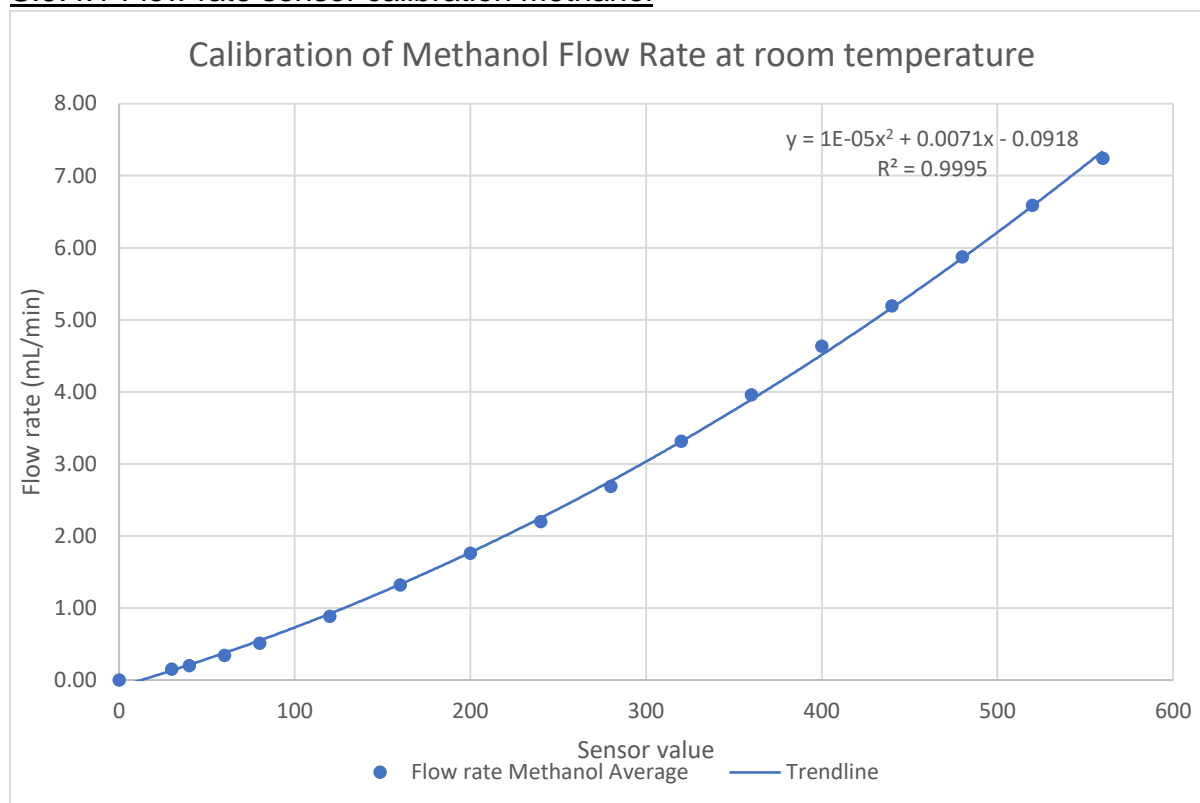

**Supplementary Graph 9:** Correlation of the flow rates of Methanol and the liquid flow sensor value at room temperature.

| Flow rate Sensor value | Flow rate 1 | Flow rate 2 | Flow rate 3 | Flow rate Methanol Average |
|------------------------|-------------|-------------|-------------|----------------------------|
| 0                      | 0           | 0           | 0           | 0                          |
| 30                     | 0.15        | 0.15        | 0.15        | 0.15                       |
| 40                     | 0.18        | 0.21        | 0.21        | 0.20                       |
| 60                     | 0.34        | 0.34        | 0.35        | 0.34                       |
| 80                     | 0.51        | 0.52        | 0.50        | 0.51                       |
| 120                    | 0.89        | 0.89        | 0.87        | 0.88                       |
| 160                    | 1.30        | 1.34        | 1.32        | 1.32                       |
| 200                    | 1.74        | 1.77        | 1.77        | 1.76                       |
| 240                    | 2.22        | 2.17        | 2.21        | 2.20                       |
| 280                    | 2.66        | 2.69        | 2.71        | 2.69                       |
| 320                    | 3.28        | 3.37        | 3.29        | 3.32                       |
| 360                    | 3.98        | 3.96        | 3.93        | 3.96                       |
| 400                    | 4.50        | 4.71        | 4.69        | 4.64                       |
| 440                    | 5.26        | 5.10        | 5.23        | 5.19                       |
| 480                    | 5.77        | 5.87        | 6.00        | 5.88                       |
| 520                    | 6.53        | 6.69        | 6.55        | 6.59                       |
| 560                    | 7.14        | 7.38        | 7.19        | 7.24                       |

**Supplementary Table 43:** Flow rate of Methanol calibrations.

### S.9.4.2 Flow rate sensor calibration IPA

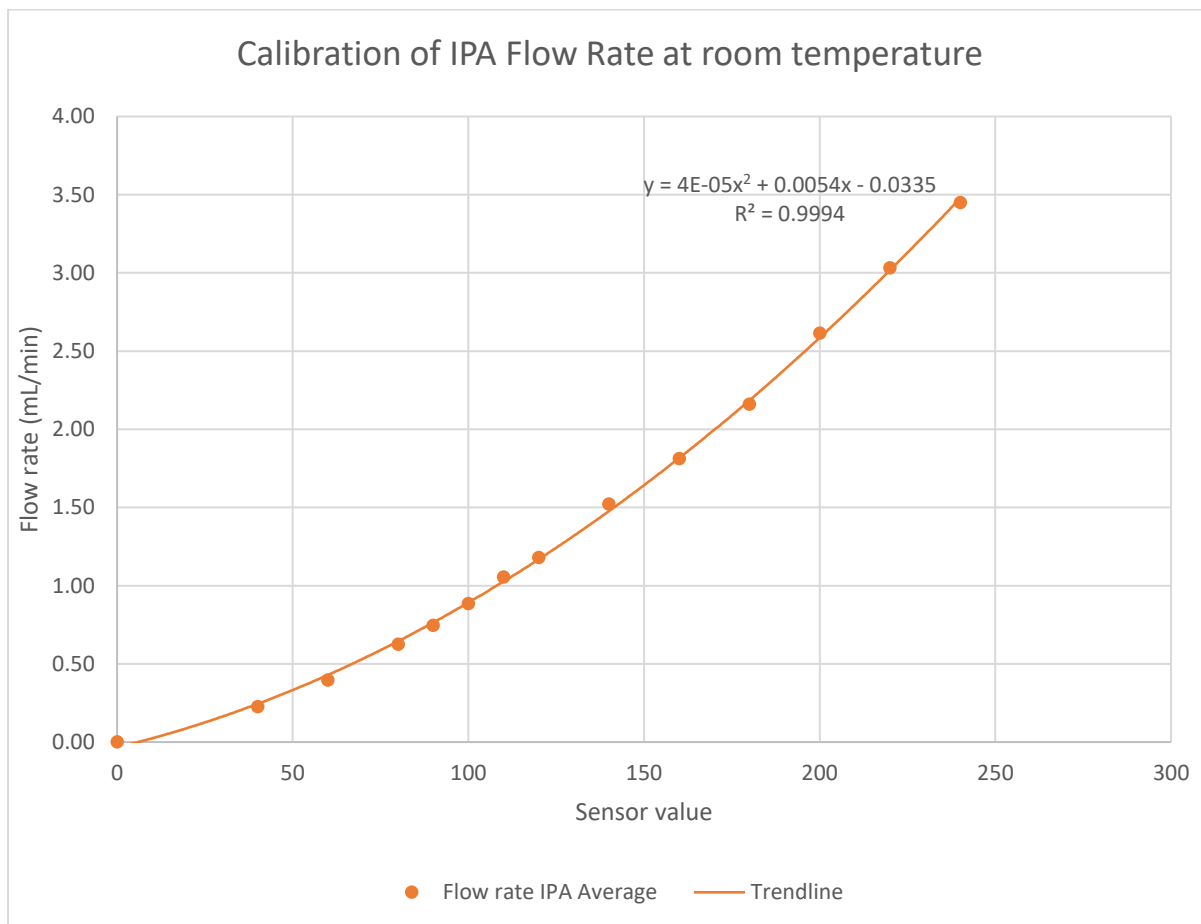

**Supplementary Graph 10:** Correlation of the flow rates of IPA and the liquid flow sensor value at room temperature.

| Flow rate Sensor value | Flow rate IPA 1 | Flow rate IPA 2 | Flow rate IPA 3 | Flow rate IPA Average |
|------------------------|-----------------|-----------------|-----------------|-----------------------|
| 0                      | 0.00            | 0.00            | 0.00            | 0.00                  |
| 40                     | 0.22            | 0.22            | 0.24            | 0.23                  |
| 60                     | 0.38            | 0.40            | 0.40            | 0.39                  |
| 80                     | 0.62            | 0.62            | 0.64            | 0.63                  |
| 90                     | 0.75            | 0.75            | 0.74            | 0.75                  |
| 100                    | 0.89            | 0.88            | 0.88            | 0.88                  |
| 110                    | 1.05            | 1.06            | 1.06            | 1.05                  |
| 120                    | 1.19            | 1.14            | 1.20            | 1.18                  |
| 140                    | 1.49            | 1.53            | 1.55            | 1.52                  |
| 160                    | 1.84            | 1.77            | 1.82            | 1.81                  |
| 180                    | 2.12            | 2.19            | 2.17            | 2.16                  |
| 200                    | 2.63            | 2.63            | 2.58            | 2.61                  |
| 220                    | 3.05            | 2.99            | 3.06            | 3.03                  |
| 240                    | 3.43            | 3.44            | 3.48            | 3.45                  |

**Supplementary Table 44:** Flow rate of IPA calibrations.

### S.9.4.3 Flow rate sensor calibration Acetone

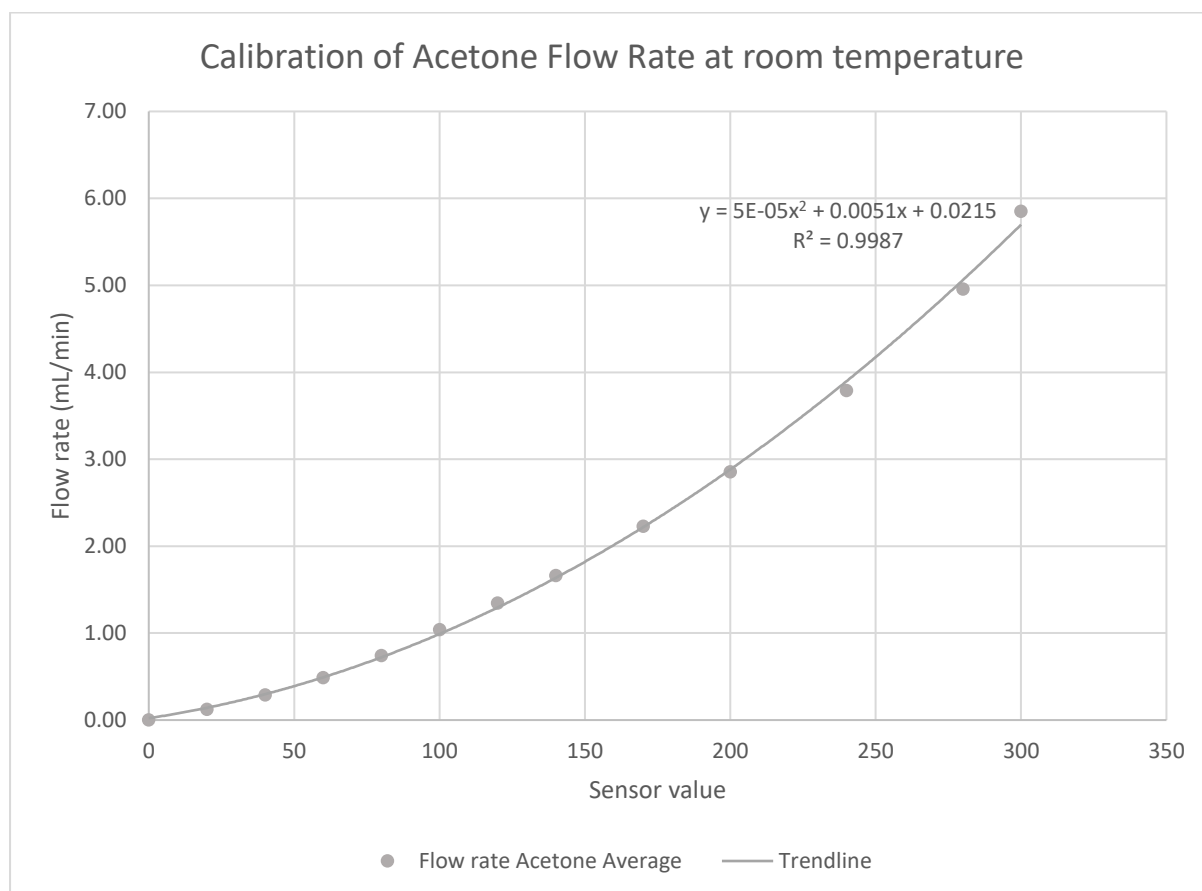

**Supplementary Graph 11:** Correlation of the flow rates of Acetone and the liquid flow sensor value at room temperature.

| Flow rate Sensor value | Flow rate Acetone 1 | Flow rate Acetone 2 | Flow rate Acetone 3 | Flow rate Acetone Average |
|------------------------|---------------------|---------------------|---------------------|---------------------------|
| 0                      | 0                   | 0                   | 0                   | 0.00                      |
| 20                     | 0.12                | 0.12                | 0.12                | 0.12                      |
| 40                     | 0.29                | 0.28                | 0.30                | 0.29                      |
| 60                     | 0.45                | 0.50                | 0.51                | 0.49                      |
| 80                     | 0.74                | 0.74                | 0.73                | 0.74                      |
| 100                    | 1.00                | 1.05                | 1.06                | 1.04                      |
| 120                    | 1.37                | 1.31                | 1.34                | 1.34                      |
| 140                    | 1.65                | 1.66                | 1.66                | 1.66                      |
| 170                    | 2.23                | 2.22                | 2.22                | 2.23                      |
| 200                    | 2.84                | 2.82                | 2.91                | 2.86                      |
| 240                    | 3.81                | 3.75                | 3.81                | 3.79                      |
| 280                    | 4.98                | 4.92                | 4.96                | 4.95                      |
| 300                    | 5.92                | 5.77                | 5.87                | 5.85                      |

**Supplementary Table 45:** Flow rate of Acetone calibrations.

### S.9.4.4 Flow rate sensor calibration Ethanol

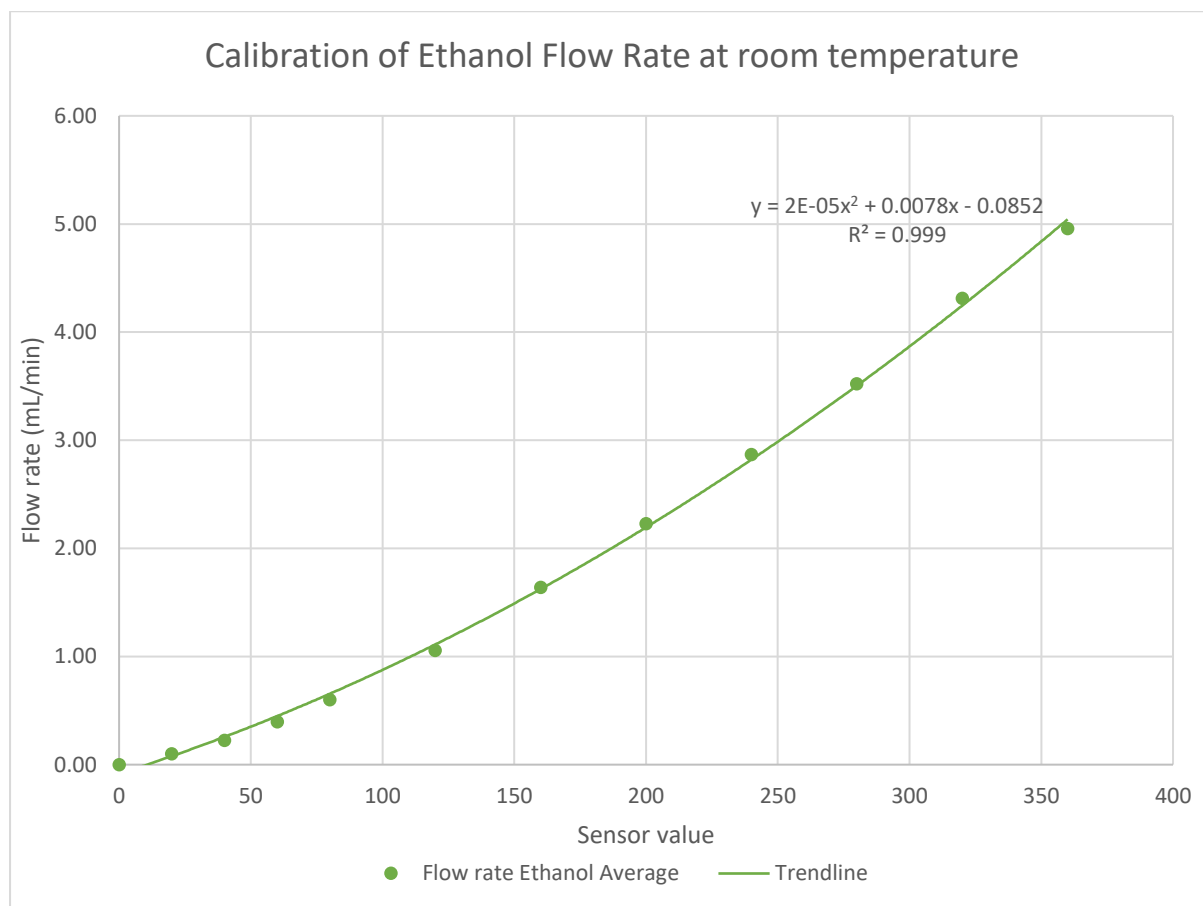

**Supplementary Graph 12:** Correlation of the flow rates of Ethanol and the liquid flow sensor value at room temperature.

| Flow rate Sensor value | Flow rate 1 | Flow rate 2 | Flow rate 3 | Flow rate Ethanol Average |
|------------------------|-------------|-------------|-------------|---------------------------|
| 0                      | 0           | 0           | 0           | 0.00                      |
| 20                     | 0.09        | 0.10        | 0.11        | 0.10                      |
| 40                     | 0.22        | 0.21        | 0.24        | 0.22                      |
| 60                     | 0.39        | 0.40        | 0.40        | 0.40                      |
| 80                     | 0.60        | 0.60        | 0.60        | 0.60                      |
| 120                    | 1.07        | 1.05        | 1.05        | 1.06                      |
| 160                    | 1.61        | 1.64        | 1.67        | 1.64                      |
| 200                    | 2.23        | 2.23        | 2.22        | 2.23                      |
| 240                    | 2.82        | 2.85        | 2.92        | 2.87                      |
| 280                    | 3.51        | 3.48        | 3.57        | 3.52                      |
| 320                    | 4.32        | 4.31        | 4.30        | 4.31                      |
| 360                    | 4.95        | 4.96        | 4.96        | 4.96                      |

**Supplementary Table 46:** Flow rate of Ethanol calibrations.

### S.9.4.5 Flow rate sensor calibration Acetonitrile

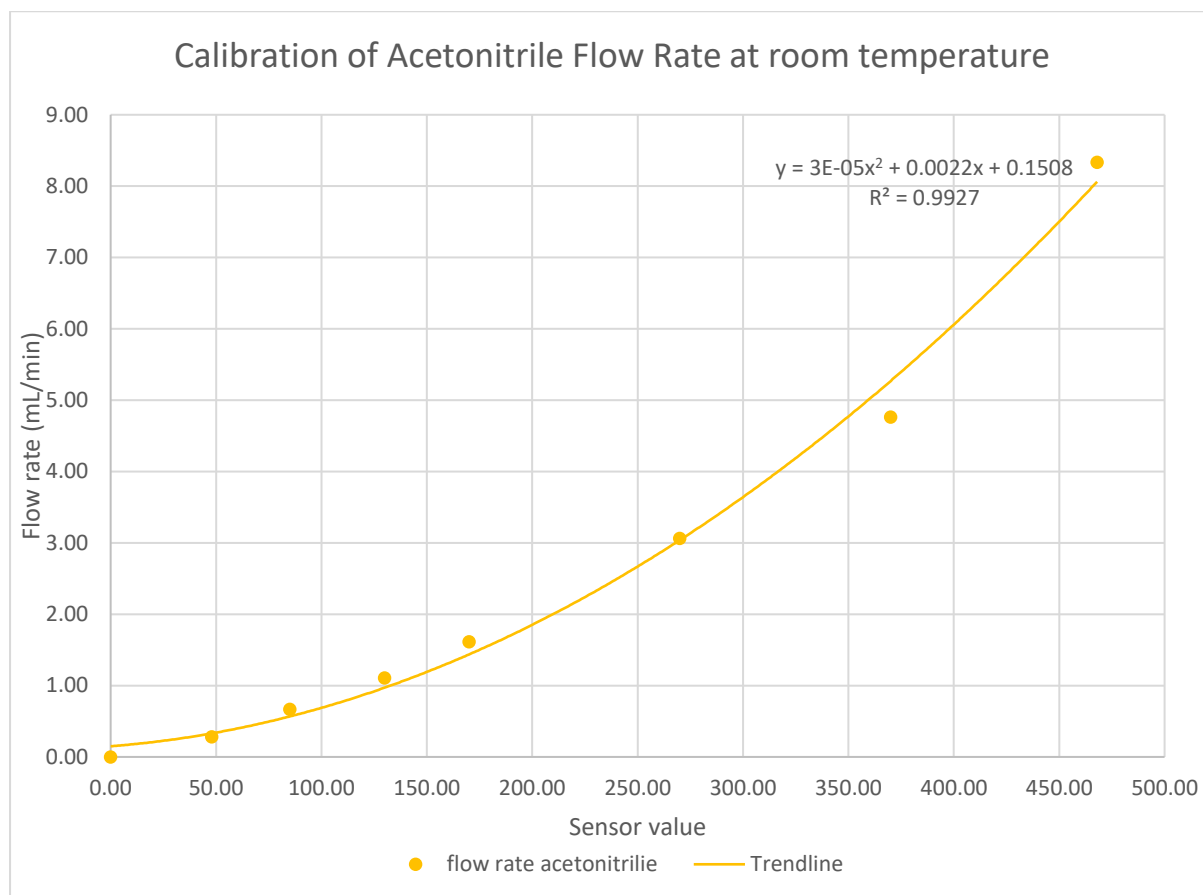

**Supplementary Graph 13:** Correlation of the flow rates of Acetonitrile and the liquid flow sensor value at room temperature.

| Flow rate sensor | flow rate Acetonitrile |
|------------------|------------------------|
| 0.00             | 0.00                   |
| 48.00            | 0.28                   |
| 85.00            | 0.67                   |
| 130.00           | 1.11                   |
| 170.00           | 1.61                   |
| 270.00           | 3.06                   |
| 370.00           | 4.76                   |
| 468.00           | 8.33                   |

**Supplementary Table 47:** Flow rate of Acetonitrile calibrations.



## S.10 General reaction procedures

### Scheme 1: Synthesis of 5-Nitro-2-(4-nitrophenoxy)pyridine (**3**)<sup>1</sup>

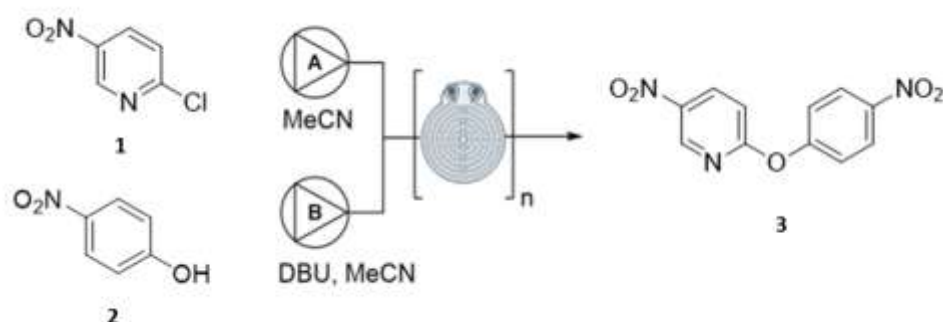

A solution of 2-chloro-5-nitropyridine (0.07 g, 0.442 mmol) **1** in acetonitrile (2 mL) was injected into loop A. A solution of 4-nitrophenol (0.08 g, 0.574 mmol) **2** and DBU (0.13 mL, 0.861 mmol) in acetonitrile (2 mL) was injected into loop B. The temperature on the hotplate was set to 65 °C, 75 °C and 100 °C in order for the second CDR internal temperature to be 55 °C, 65 °C and 85 °C respectively. The first 15 minutes only ACN was running through the CDRs. Once the hotplate temperature was reached and stabilized, the valves were turned to the left to run the reaction for 60 min approximately. They were made to pass through two to six CDRs (3D printed in PP) at 5 psi (0.33 mL/min). A 120 mm RED capillary was fitted after the last CDR in order to maintain the constant flow.<sup>1</sup> The reaction mixture was then concentrated under reduced pressure to give the crude product.

**Entry 1:** the residue was purified via Biotage (9:1 Hex/EtOAc; snap 10 g column) to give 5-nitro-2-(4-nitrophenoxy)pyridine **3** (0.025 g, 0.097 mmol, 22 % yield) as a white solid.

**Entry 2:** the residue was purified via Biotage (9:1 Hex/EtOAc; snap 10 g column) to give 5-nitro-2-(4-nitrophenoxy)pyridine **3** (0.031 g, 0.119 mmol, 27 % yield) as a white solid.

**Entry 3:** the residue was purified via Biotage (9:1 Hex/EtOAc; snap 10 g column) to give 5-nitro-2-(4-nitrophenoxy)pyridine **3** (0.044 g, 0.168 mmol, 38 % yield) as a white solid.

**Entry 4:** the residue was purified via Biotage (9:1 Hex/EtOAc; snap 10 g column) to give 5-nitro-2-(4-nitrophenoxy)pyridine **3** (0.044 g, 0.168 mmol, 38 % yield) as a white solid.

**Entry 5:** the residue was purified via Biotage (9:1 Hex/EtOAc; snap 10 g column) to give 5-nitro-2-(4-nitrophenoxy)pyridine **3** (0.074 g, 0.283 mmol, 64 % yield) as a white solid.

**Entry 6:** the residue was purified via Biotage (9:1 Hex/EtOAc; snap 10 g column) to give 5-nitro-2-(4-nitrophenoxy)pyridine **3** (0.080 g, 0.305 mmol, 69 % yield) as a white solid.

**Entry 7:** the residue was purified via Biotage (9:1 Hex/EtOAc; snap 10 g column) to give 5-nitro-2-(4-nitrophenoxy)pyridine **3** (0.1078 g, 0.413 mmol, 93 % yield) as a white solid.

**Entry 8:** Scale up

A Duran pressure bottle was charged with ACN (250 mL). Bottle A was charged with 80 mL of a solution 1 2-chloro-5-nitropyridine (containing 2.8 g) **1** in ACN and connected to loop A. Bottle B was charged with 80 mL a solution of 4-nitrophenol (containing 3.2 g) **2** in the presence of DBU (containing 5.2 mL) in ACN and connected to loop B. The temperature on the hotplate was set at 100 °C in order for the second CDR internal temperature to be 83 °C. The system was set up at 6 PSI, 6 CDRs and a 120 mm RED capillary was fitted at the end of the 6<sup>th</sup> reactor in order to maintain the constant flow. All tubing was filled with acetonitrile prior to carrying out the reaction. The scaled up version of the SnAr reaction was controlled through the Megunolink platform:

- System Volume: 2 mL
- Loop volume: 2 mL (Loop A) and 2 mL (Loop B)
- Pre Collect: 5 mL
- Post Collect: 10 mL
- Injection Volume: 60 mL

The residue was purified via Biotage (9:1, Hex/EtOAc; zip sphere 45 column) to give 5-nitro-2-(4-nitrophenoxy)pyridine (1.557 g, 5.96 mmol, 90 % yield) as a white solid.

Mp 95-98 °C; <sup>1</sup>H NMR (400 MHz, Chloroform-d) δ 9.03 (d, J = 2.8 Hz, 1H), 8.56 (dd, J = 9.0, 2.8 Hz, 1H), 8.38 – 8.30 (m, 2H), 7.40 – 7.32 (m, 2H), 7.18 (d, J = 9.0 Hz, 1H). <sup>13</sup>C NMR (101 MHz, Chloroform-d) δ 165.4 , 157.5 , 145.2 , 144.6 , 141.1 , 135.4 , 125.6 , 122.1 , 112.2

**Scheme 2:** Synthesis of 1,2-bis(4-methoxyphenyl)-1,2-diphenylethane-1,2-diol (**4**)<sup>8</sup>

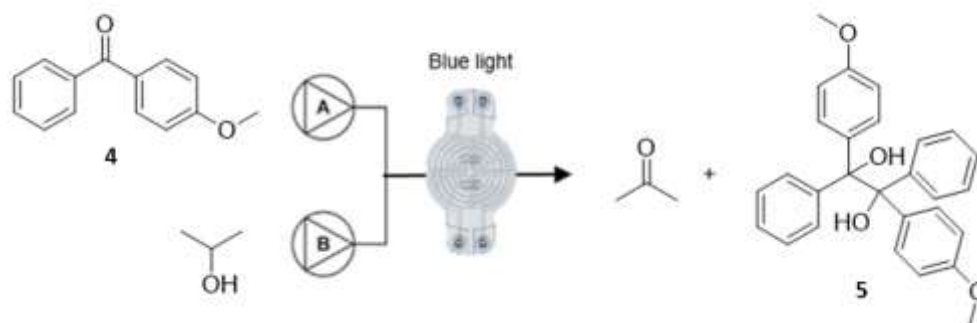

**Entry 9:** a solution of 4-methoxybenzophenone (0.176 g, 0.829 mmol) **4** in 5 mL of acetone and 5 mL of 2-propanol was reacted in the presence of acetic acid to obtain the product **5**. 10 mL of a 0.2 M stock solution was taken for reaction and 5 drops of acetic acid added as a catalyst. The solution was placed into two 2 mL syringes, each one injected to a different loop (A and B) and passed through one photoreactor at 0.1 mL/ min. The lamp used was a Kessil 395 nm lamp, blue light and maximum intensity while being air cooled, placed 30 mm above CDR, mirror and reflective coating. A 120mm RED capillary was fitted after the photoreactor in order to maintain the constant flow. The reaction took 100 minutes to be completed. The reaction mixture was then concentrated under reduced pressure to give the crude product. The residue was purified by column chromatography via Biotage ( 9:1 Hex/EtOAc; snap 10 g column) to give 1,2-bis(4-methoxyphenyl)-1,2-diphenylethane-1,2-diol (0.108 g, 0.253 mmol, 61%) as a colorless oil.

**Entry 10:** Scale up

A 250 mL Duran pressure bottle was charged with 60mL of a solution of 4-methoxybenzophenone **4** (1.1 g, 5.18 mmol) in acetone (30 mL) and 2-propanol (30 mL) in the presence of acetic acid (20 drops) to obtain the product **5**. Bottle A and B were charged with 80 mL of a 1:1 solution of 2-propanol and acetone. The duran foil was covered with foil to avoid contact with light. The solution was passed through one photoreactor at 0.066 mL/ min. The lamp used was 395 nm, blue light and maximum intensity while being air cooled, placed 30 mm above CDR, mirror and reflective coating. A 120mm RED capillary was fitted after the photoreactor in order to maintain the constant flow. The reaction took 375 minutes to be completed. The scaled up version of the SnAr reaction was controlled through the Megunolink platform:

- System Volume: 2 mL
- Loop volume: 2 mL (Loop A) and 2 mL (Loop B)

- Pre Collect: 5 mL
- Post Collect: 5 mL
- Injection Volume: 25 mL

The residue was purified by column chromatography via Biotage ( 9:1 Hex/EtOAc; snap 10 g column) to give 1,2-bis(4-methoxyphenyl)-1,2-diphenylethane-1,2-diol (0.9057 g, 2.124 mmol, 82%) as a colorless oil.

<sup>1</sup>H NMR (400 MHz, Propanol)  $\delta$  7.31 (dd, J = 8.7, 4.5 Hz, 2H), 7.17 (dd, J = 8.6, 3.4 Hz, 5H), 6.74 – 6.68 (m, 2H), 3.76 (d, J = 4.8 Hz, 3H). <sup>13</sup>C NMR (101 MHz, CDCl<sub>3</sub>)  $\delta$  158.5, 158.4, 144.6, 144.6, 136.5, 136.4, 130.0, 129.9, 128.7, 128.6, 127.4, 127.3, 112.7, 112.7, 99.9, 83.0, 55.2, 55.2.

**Scheme 3:** Synthesis of methyl 3-bromo-3-phenylpropanoate (**8**)<sup>9</sup>

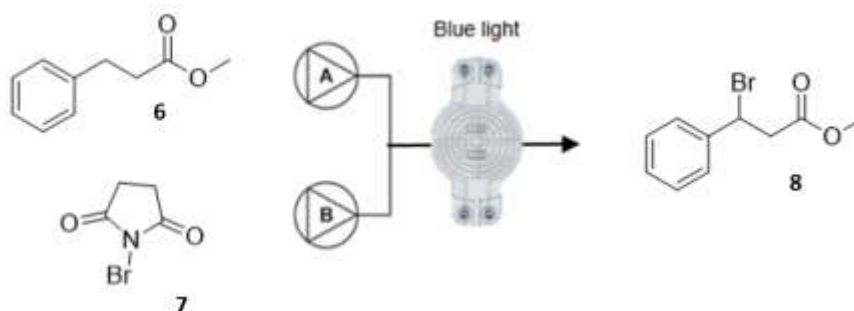

**Entry 11:** solution of methyl 3-phenylpropanoate **6** (0.470 mL) and NBS **7** (0.561 g) were dissolved in acetonitrile (10 mL) to make a 10 mL stock solution of 0.5 M. The solution was placed into two 2 mL syringes (4 mL in total), each one injected to a different loop (A and B) and passed through the photoreactor at 5 mL/ min. CDR was air cooled. Kessil A160WE (lamp A), 0% colour (blue), 100% intensity placed 30 mm above CDR, mirror & reflective coating. A 120 mm RED capillary was fitted after the last CDR in order to maintain the constant flow. After the injection of the reactants into the flow path, the reaction was collected over a period of 4 minutes. The residue was purified via Biotage (2-5% Hex/EtOAc; snap 10 g column) to give methyl 3-bromo-3-phenylpropanoate (0.43 g, 1.79 mmol, 89%) **8** as a colorless oil.

**Entry 12:** Scale up

A 250 mL Duran pressure bottle was charged with 50 mL of a solution of methyl 3-phenylpropanoate **6** (containing 2.05 g) and NBS **7** (containing 2.33 g) were dissolved in acetonitrile (50 mL) to make a 50 mL stock solution of 0.25 M. Bottle A and B were charged with 80 mL of acetonitrile. The solution passed through the photoreactor at 5 mL/ min. CDR was air cooled. Kessil A160WE (lamp A), 0% colour (blue), 100% intensity placed 30 mm above CDR, mirror & reflective coating. A 120mm RED capillary was fitted after the last CDR in order to maintain the constant flow. After the injection of the reactants into the flow path, the reaction was collected over a period of 20 minutes. The scaled up version of the SnAr reaction was controlled through the Megunolink platform:

- System Volume: 2 mL
- Loop volume: 2 mL (Loop A) and 2 mL (Loop B)
- Pre Collect: 5 mL
- Post Collect: 5 mL
- Injection Volume: 40 mL

The residue was purified via Biotage (2-5% Hex/EtOAc; snap 50 g column) to give methyl 3-bromo-3-phenylpropanoate (2.07 g, 8.52 mmol, 85%) **8** as a yellow oil.

$^1\text{H}$  NMR (400 MHz, Chloroform- $d$ )  $\delta$  7.47 – 7.25 (m, 5H), 5.45 – 5.37 (m, 1H), 3.70 (s, 3H), 3.36 (dd,  $J$  = 16.2, 9.1 Hz, 1H), 3.22 (dd,  $J$  = 16.2, 6.1 Hz, 1H).  $^{13}\text{C}$  NMR (101 MHz,  $\text{CDCl}_3$ )  $\delta$  169.9, 140.5, 128.6, 126.9, 51.8, 47.6, 44.4.

### H-NMR Product 3

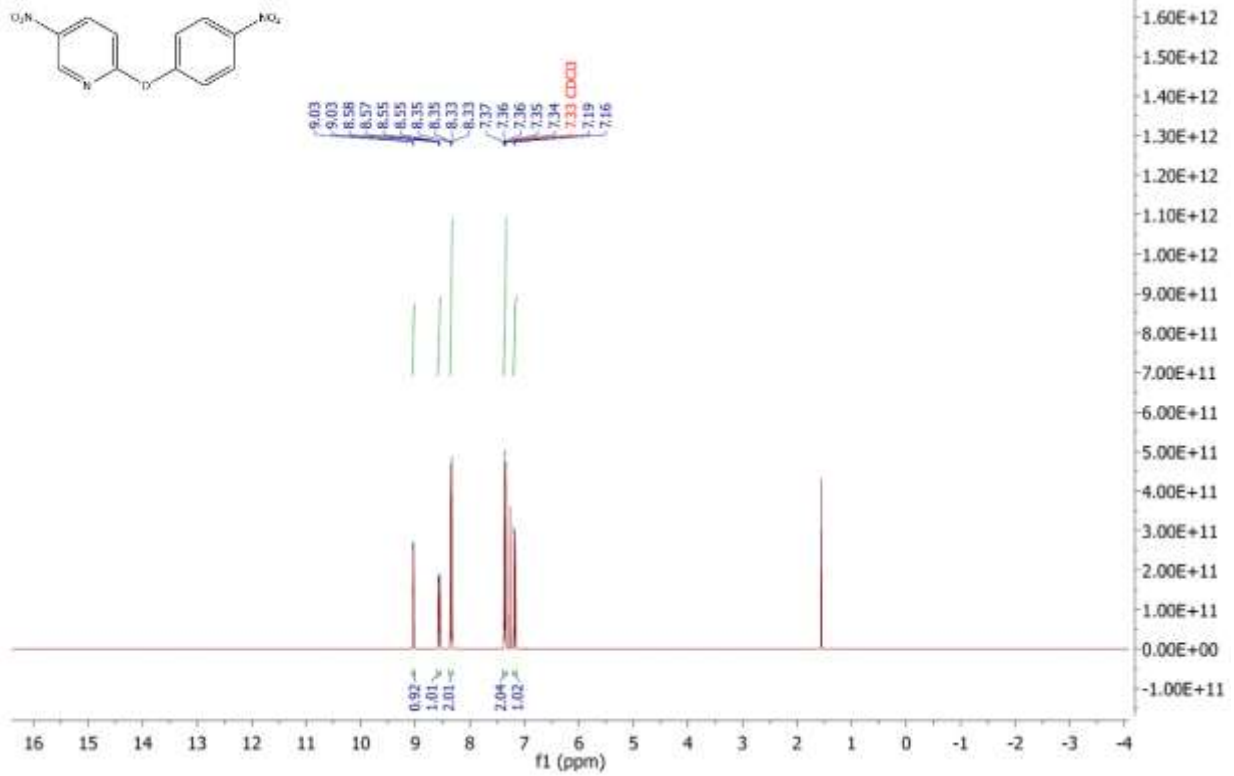

### C-NMR Product 3

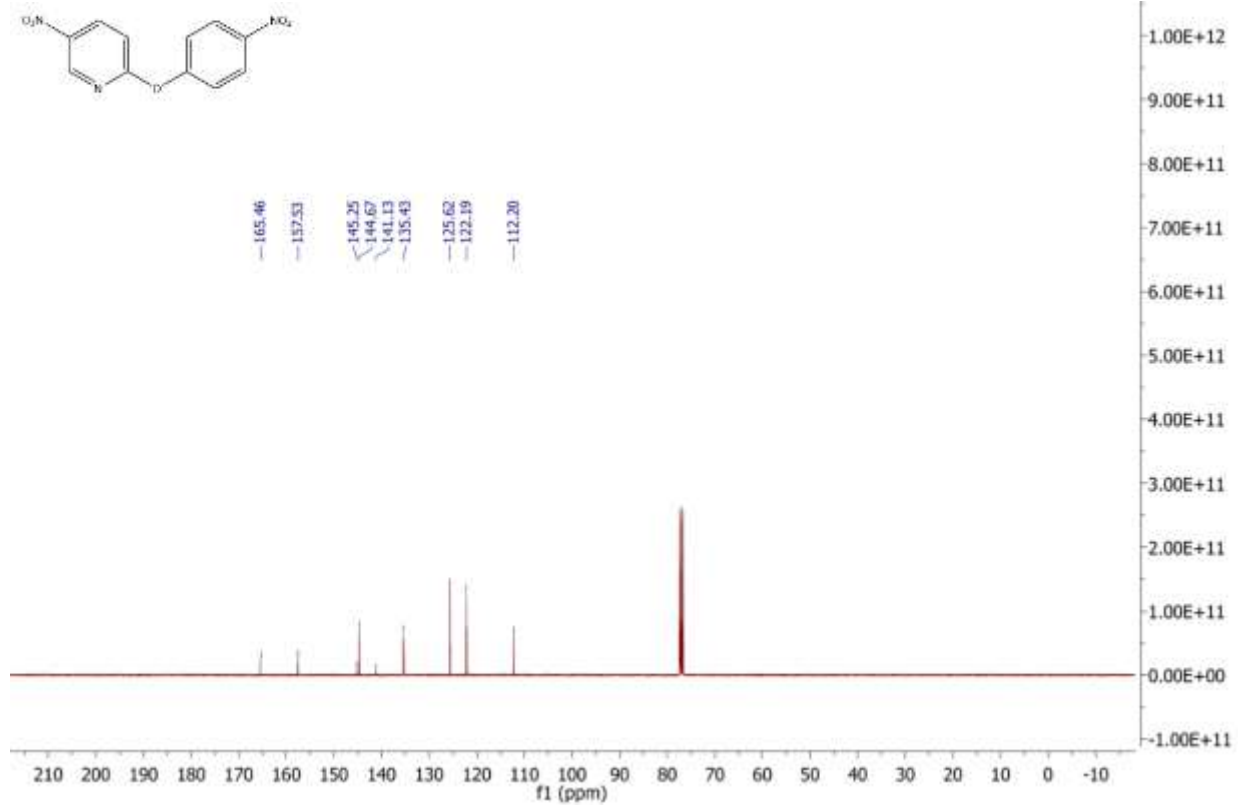

### H- NMR Product 5

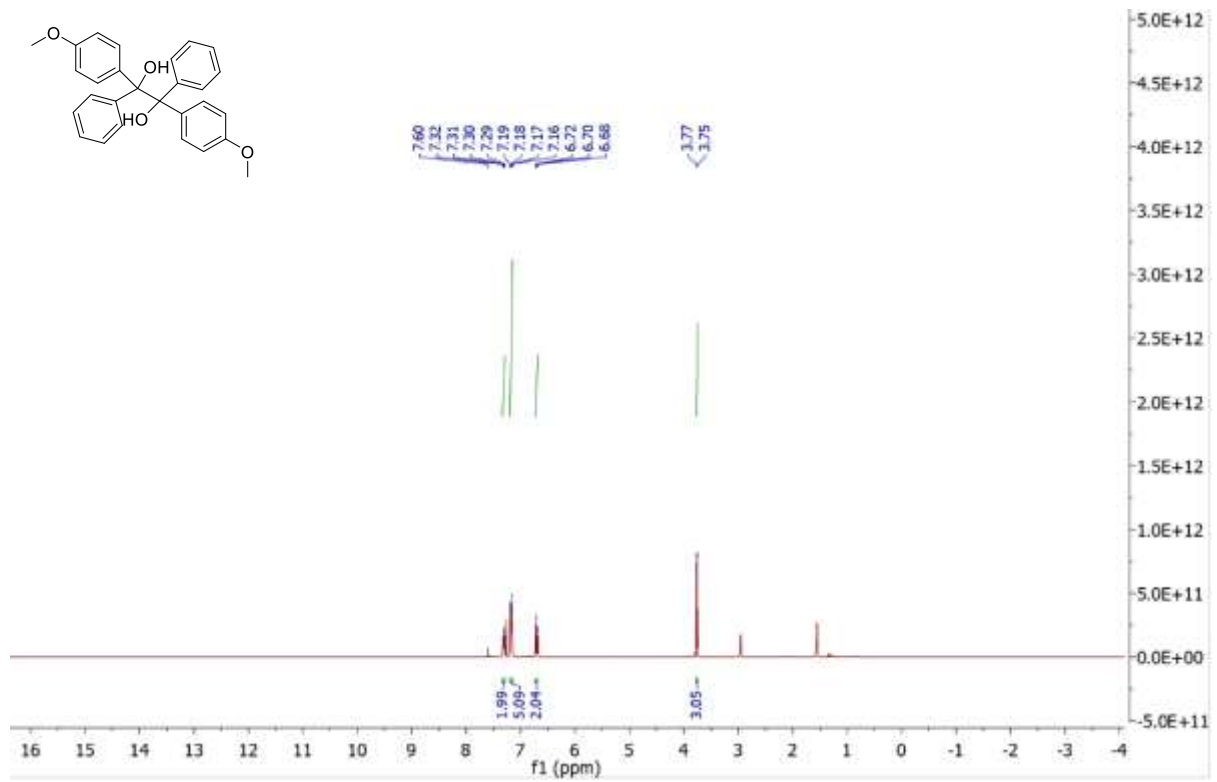

### C- NMR Product 5

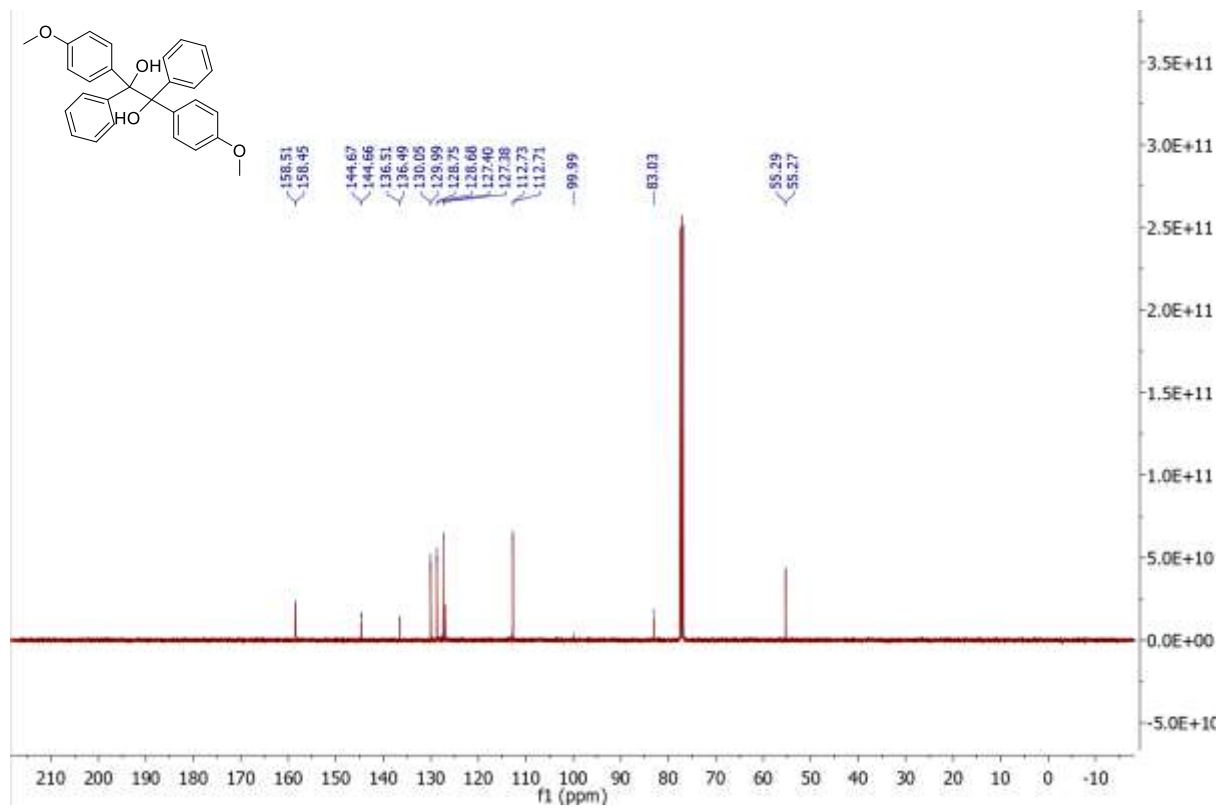



### H- NMR Product 8

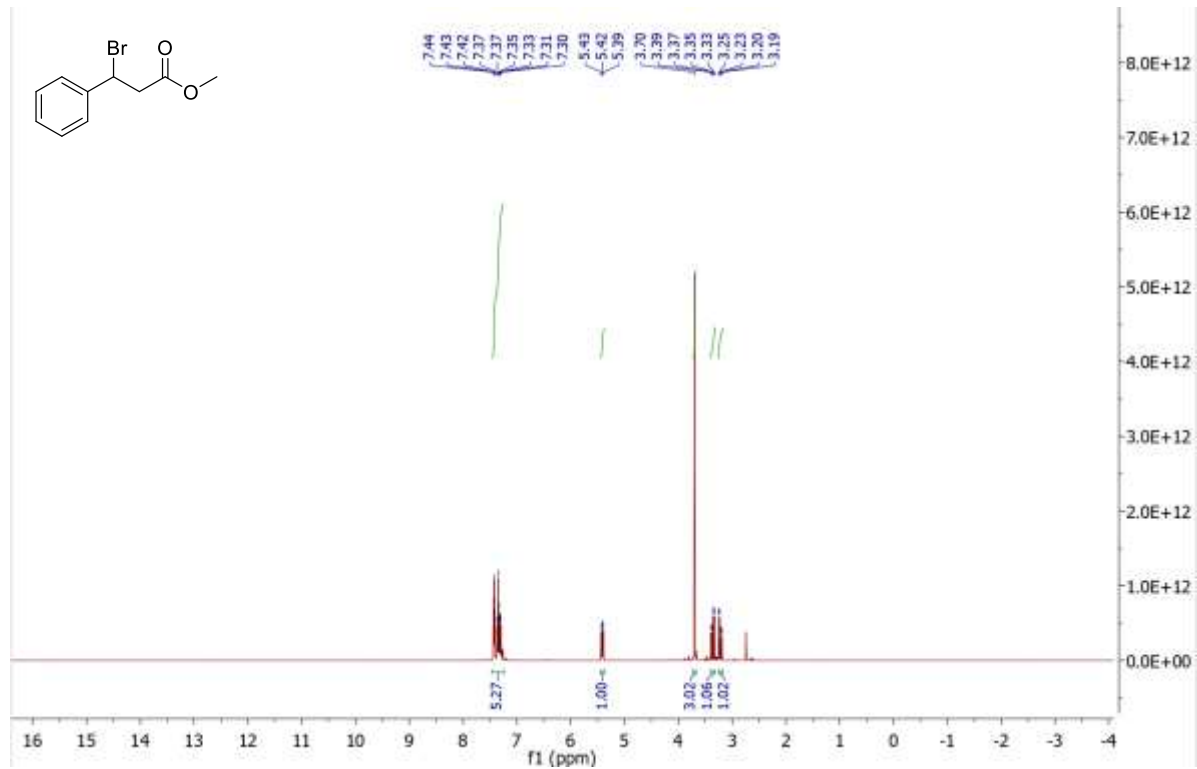

### C- NMR Product 8

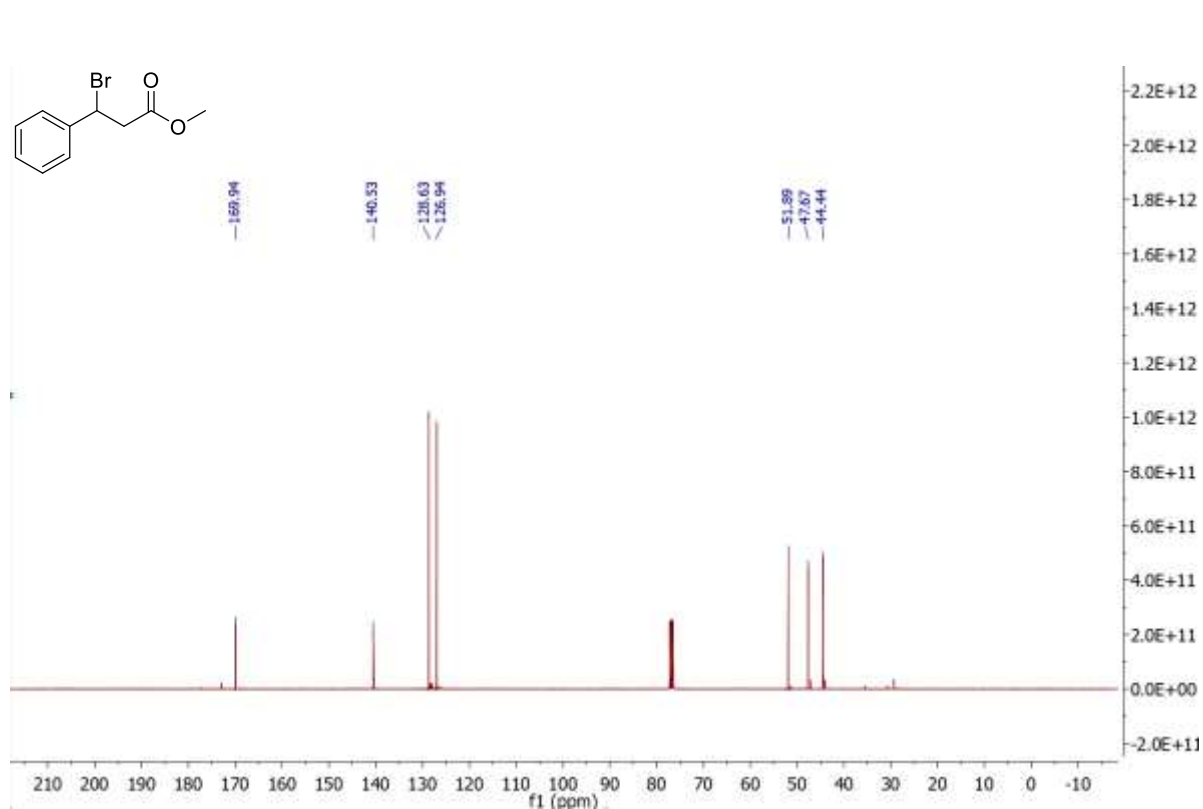

## S.11 References

- 1) Penny MR, Rao ZX, Peniche BF, Hilton ST Modular 3D printed compressed air driven continuous-flow systems for chemical synthesis. *Eur J Org Chem* **2019**:3783–3787.
- 2) <https://3dgbire.com/pages/about-us> Accessed 8<sup>th</sup> April 2023.
- 3) <https://www.tinkercad.com/> Accessed 8<sup>th</sup> April 2023.
- 4) <https://ultimaker.com/software/ultimaker-cura/> Accessed 8<sup>th</sup> April 2023.
- 5) <https://www.megunolink.com/> Accessed 8<sup>th</sup> April 2023.
- 6) Walmsley L, Hilton S, Sellier E, Penny M, Maddox D. Control and Monitoring of Temperature in 3D-Printed Circular Disk Reactors for Continuous Flow Photochemistry using Raspberry Pi Based Software. *ChemRxiv*. Cambridge: Cambridge Open Engage; **2021**.
- 7) <https://sensirion.com/products/catalog/SLF3C-1300F/> Accessed 8<sup>th</sup> April 2023.
- 8) Kate Volpe K., Podlesny, E. E., Modernization of a Photochemical Reaction for the Undergraduate Laboratory: Continuous Flow Photopinacol Coupling *J. Chem. Educ.* **2020**, 97, 2, 586–591
- 9) Penny M, Hilton S. 3D Printed Reactors and Kessil Lamp Holders for Flow Photochemistry: Design and System Standardization . *ChemRxiv*. Cambridge: Cambridge Open Engage; **2021**.
